# Supplementary material for: Identification of circRNA-miRNA-mRNA Networks to investigate lung adenocarcinoma pathogenesis based on whole-transcriptome analysis
Source: Research Square preprint supplement (doi:10.21203/rs.3.rs-1559899/v1), 2022-04-15
Supplement: Supplementary file 1 [file 2a61784785aade6f85168eb9.xls]

## Sheet: miRNA -靶RNA对应关系表
miRNA	Target transcript id	Target RNA type	Target gene id	Target gene name	Target gene description	Corr	pvalue	padjust	miRTarBase
hsa-miR-1343-3p	19_5016257_5041251	circRNA	ENSG00000127663	KDM4B	lysine demethylase 4B [Source:HGNC Symbol;Acc:HGNC:29136]	-0.588235	0.0130009	0.0956732	no
hsa-miR-574-3p	3_18463480_18530185	circRNA				-0.631335	0.00656652	0.078789	no
hsa-miR-92b-5p	19_5016257_5041251	circRNA	ENSG00000127663	KDM4B	lysine demethylase 4B [Source:HGNC Symbol;Acc:HGNC:29136]	-0.502451	0.039833	0.142386	no
hsa-miR-636	4_51860543_51891851	circRNA	ENSG00000109184	DCUN1D4	defective in cullin neddylation 1 domain containing 4 [Source:HGNC Symbol;Acc:HGNC:28998]	-0.559934	0.0194142	0.110269	no
hsa-miR-6734-5p	3_121844453_121857156	circRNA	ENSG00000145088	EAF2	ELL associated factor 2 [Source:HGNC Symbol;Acc:HGNC:23115]	-0.593098	0.0120922	0.0934061	no
hsa-miR-766-3p	2_172568741_172596023	circRNA	ENSG00000152256	PDK1	pyruvate dehydrogenase kinase 1 [Source:HGNC Symbol;Acc:HGNC:8809]	-0.689148	0.00221314	0.0566907	no
hsa-miR-6509-3p	3_141509568_141540609	circRNA	ENSG00000155903	RASA2	RAS p21 protein activator 2 [Source:HGNC Symbol;Acc:HGNC:9872]	-0.586954	0.0132491	0.0962338	no
hsa-miR-125a-3p	4_51860543_51891851	circRNA	ENSG00000109184	DCUN1D4	defective in cullin neddylation 1 domain containing 4 [Source:HGNC Symbol;Acc:HGNC:28998]	-0.760019	0.000399374	0.0365503	no
hsa-miR-6511b-3p	3_20119598_20140364	circRNA	ENSG00000114166	KAT2B	lysine acetyltransferase 2B [Source:HGNC Symbol;Acc:HGNC:8638]	-0.526095	0.0300633	0.127718	no
hsa-miR-5100	3_18463480_18527326	circRNA				-0.622877	0.00756587	0.0818629	no
hsa-miR-6882-3p	9_36581644_36583712	circRNA	ENSG00000165304	MELK	maternal embryonic leucine zipper kinase [Source:HGNC Symbol;Acc:HGNC:16870]	-0.529847	0.0287001	0.126445	no
hsa-miR-616-3p	17_12081356_12113360	circRNA	ENSG00000065559	MAP2K4	mitogen-activated protein kinase kinase 4 [Source:HGNC Symbol;Acc:HGNC:6844]	-0.599363	0.0109963	0.0903179	no
hsa-miR-423-5p	14_102194938_102209862	circRNA	ENSG00000140153	WDR20	WD repeat domain 20 [Source:HGNC Symbol;Acc:HGNC:19667]	-0.550583	0.0220034	0.114531	no
hsa-miR-363-5p	1_51745536_51765981	circRNA	ENSG00000117859	OSBPL9	oxysterol binding protein like 9 [Source:HGNC Symbol;Acc:HGNC:16386]	-0.662475	0.00375842	0.0671316	no
hsa-miR-6780a-5p	3_19975601_19978403	circRNA	ENSG00000144566,ENSG00000183977	RAB5A,PP2D1		-0.620098	0.00791952	0.0825871	no
hsa-miR-328-3p	19_5016257_5041251	circRNA	ENSG00000127663	KDM4B	lysine demethylase 4B [Source:HGNC Symbol;Acc:HGNC:29136]	-0.556373	0.0203706	0.111852	no
hsa-miR-6780a-5p	15_75854386_75873568	circRNA	ENSG00000140367	UBE2Q2	ubiquitin conjugating enzyme E2 Q2 [Source:HGNC Symbol;Acc:HGNC:19248]	-0.636671	0.00599274	0.0771711	no
hsa-miR-197-3p	19_5016257_5041251	circRNA	ENSG00000127663	KDM4B	lysine demethylase 4B [Source:HGNC Symbol;Acc:HGNC:29136]	-0.529412	0.0288557	0.12676	no
hsa-miR-6509-3p	4_6967304_7001251	circRNA	ENSG00000132405	TBC1D14	TBC1 domain family member 14 [Source:HGNC Symbol;Acc:HGNC:29246]	-0.543325	0.0241919	0.118559	no
hsa-miR-6862-5p	15_75854386_75873568	circRNA	ENSG00000140367	UBE2Q2	ubiquitin conjugating enzyme E2 Q2 [Source:HGNC Symbol;Acc:HGNC:19248]	-0.613164	0.00886001	0.0845842	no
hsa-miR-6855-5p	4_51860543_51891851	circRNA	ENSG00000109184	DCUN1D4	defective in cullin neddylation 1 domain containing 4 [Source:HGNC Symbol;Acc:HGNC:28998]	-0.682694	0.00252788	0.0585734	no
hsa-miR-5100	3_18463480_18530185	circRNA				-0.61004	0.00931175	0.0858297	no
hsa-miR-6749-3p	17_42568470_42570183	circRNA	ENSG00000108788	MLX	MLX, MAX dimerization protein [Source:HGNC Symbol;Acc:HGNC:11645]	-0.539162	0.025521	0.120987	no
hsa-miR-6780a-5p	3_155114994_155118811	circRNA	ENSG00000196549	MME	membrane metalloendopeptidase [Source:HGNC Symbol;Acc:HGNC:7154]	-0.660815	0.00387791	0.0681937	no
hsa-miR-1976	6_156901376_156935576	circRNA	ENSG00000049618	ARID1B	AT-rich interaction domain 1B [Source:HGNC Symbol;Acc:HGNC:18040]	-0.551557	0.0217217	0.11424	no
hsa-miR-6511b-3p	3_141501949_141529802	circRNA	ENSG00000155903	RASA2	RAS p21 protein activator 2 [Source:HGNC Symbol;Acc:HGNC:9872]	-0.557045	0.0201872	0.111852	no
hsa-miR-6855-5p	6_87215903_87233527	circRNA	ENSG00000188994	ZNF292	zinc finger protein 292 [Source:HGNC Symbol;Acc:HGNC:18410]	-0.662855	0.00373147	0.0671316	no
hsa-miR-1226-3p	4_51860543_51891851	circRNA	ENSG00000109184	DCUN1D4	defective in cullin neddylation 1 domain containing 4 [Source:HGNC Symbol;Acc:HGNC:28998]	-0.533628	0.0273748	0.123051	no
hsa-miR-6734-5p	3_18463480_18530185	circRNA				-0.64762	0.00494146	0.0723654	no
hsa-miR-6825-5p	15_75854386_75873568	circRNA	ENSG00000140367	UBE2Q2	ubiquitin conjugating enzyme E2 Q2 [Source:HGNC Symbol;Acc:HGNC:19248]	-0.586545	0.0133291	0.0965006	no
hsa-miR-363-5p	5_134969939_134975324	circRNA	ENSG00000152705	CATSPER3	cation channel sperm associated 3 [Source:HGNC Symbol;Acc:HGNC:20819]	-0.604249	0.0101977	0.0893874	no
hsa-miR-23a-5p	4_51860543_51891851	circRNA	ENSG00000109184	DCUN1D4	defective in cullin neddylation 1 domain containing 4 [Source:HGNC Symbol;Acc:HGNC:28998]	-0.77539	0.000255201	0.0335771	no
hsa-miR-629-3p	9_19286769_19305527	circRNA	ENSG00000137145	DENND4C	DENN domain containing 4C [Source:HGNC Symbol;Acc:HGNC:26079]	-0.643066	0.00535886	0.0739968	no
hsa-miR-3180-3p	2_24496320_24584560	circRNA	ENSG00000084676	NCOA1	nuclear receptor coactivator 1 [Source:HGNC Symbol;Acc:HGNC:7668]	-0.60189	0.0105774	0.0903179	no
hsa-miR-4745-3p	6_144781922_144803147	circRNA	ENSG00000152818	UTRN	utrophin [Source:HGNC Symbol;Acc:HGNC:12635]	-0.559166	0.0196173	0.110762	no
hsa-miR-6825-5p	3_18463480_18530185	circRNA				-0.65951	0.00397397	0.0686084	no
hsa-miR-1229-3p	10_20147784_20177409	circRNA	ENSG00000120594	PLXDC2	plexin domain containing 2 [Source:HGNC Symbol;Acc:HGNC:21013]	-0.501859	0.0401051	0.142916	no
hsa-miR-2110	4_6967304_7001251	circRNA	ENSG00000132405	TBC1D14	TBC1 domain family member 14 [Source:HGNC Symbol;Acc:HGNC:29246]	-0.529605	0.0287867	0.126554	no
hsa-miR-6881-3p	12_100591736_100618587	circRNA	ENSG00000139354	GAS2L3	growth arrest specific 2 like 3 [Source:HGNC Symbol;Acc:HGNC:27475]	-0.683824	0.00247029	0.0582504	no
hsa-miR-6511a-3p	7_139269394_139279360	circRNA	ENSG00000157741	UBN2	ubinuclein 2 [Source:HGNC Symbol;Acc:HGNC:21931]	-0.495998	0.0428765	0.146887	no
hsa-miR-1229-3p	3_18463480_18527326	circRNA				-0.585653	0.013505	0.0967742	no
hsa-miR-6855-5p	12_100591736_100618587	circRNA	ENSG00000139354	GAS2L3	growth arrest specific 2 like 3 [Source:HGNC Symbol;Acc:HGNC:27475]	-0.737745	0.000723825	0.0414409	no
hsa-miR-6799-3p	8_67164391_67179926	circRNA	ENSG00000104218	CSPP1	centrosome and spindle pole associated protein 1 [Source:HGNC Symbol;Acc:HGNC:26193]	-0.521372	0.0318494	0.129966	no
hsa-miR-363-5p	18_51046920_51049324	circRNA	ENSG00000141646	SMAD4	SMAD family member 4 [Source:HGNC Symbol;Acc:HGNC:6770]	-0.601272	0.0106787	0.0903179	no
hsa-miR-18b-3p	13_28256292_28272071	circRNA	ENSG00000152520	PAN3	poly(A) specific ribonuclease subunit PAN3 [Source:HGNC Symbol;Acc:HGNC:29991]	-0.604443	0.0101671	0.0893874	no
hsa-miR-363-5p	7_128591850_128609579	circRNA				-0.533427	0.0274443	0.123051	no
hsa-miR-194-3p	18_36959316_36977223	circRNA	ENSG00000150477	KIAA1328	KIAA1328 [Source:HGNC Symbol;Acc:HGNC:29248]	-0.504619	0.038848	0.140367	no
hsa-miR-204-5p	X_124022531_124031125	circRNA	ENSG00000101972	STAG2	stromal antigen 2 [Source:HGNC Symbol;Acc:HGNC:11355]	-0.589275	0.0128023	0.0949058	no
hsa-miR-486-3p	5_169747396_169761625	circRNA	ENSG00000134516	DOCK2	dedicator of cytokinesis 2 [Source:HGNC Symbol;Acc:HGNC:2988]	-0.729585	0.000887289	0.0436841	no
hsa-miR-6511b-3p	22_41135813_41146816	circRNA	ENSG00000100393	EP300	E1A binding protein p300 [Source:HGNC Symbol;Acc:HGNC:3373]	-0.51314	0.0351559	0.13465	no
hsa-miR-363-5p	14_49723874_49743805	circRNA	ENSG00000197776	KLHDC1	kelch domain containing 1 [Source:HGNC Symbol;Acc:HGNC:19836]	-0.634276	0.00624505	0.0779102	no
hsa-miR-6799-3p	16_15664736_15687511	circRNA	ENSG00000133392,ENSG00000072864	MYH11,NDE1		-0.493621	0.0440409	0.148458	no
hsa-miR-1229-3p	14_65721775_65733381	circRNA	ENSG00000033170	FUT8	fucosyltransferase 8 [Source:HGNC Symbol;Acc:HGNC:4019]	-0.601662	0.0106147	0.0903179	no
hsa-miR-25-5p	2_172568741_172596023	circRNA	ENSG00000152256	PDK1	pyruvate dehydrogenase kinase 1 [Source:HGNC Symbol;Acc:HGNC:8809]	-0.641324	0.00552587	0.0742008	no
hsa-miR-4685-3p	8_21974670_21990407	circRNA	ENSG00000130227	XPO7	exportin 7 [Source:HGNC Symbol;Acc:HGNC:14108]	-0.508576	0.0370989	0.138027	no
hsa-miR-1260a	12_998324_1028572	circRNA	ENSG00000082805	ERC1	ELKS/RAB6-interacting/CAST family member 1 [Source:HGNC Symbol;Acc:HGNC:17072]	-0.491156	0.045273	0.150875	no
hsa-miR-3180-3p	17_59257122_59267174	circRNA	ENSG00000153982	GDPD1	glycerophosphodiester phosphodiesterase domain containing 1 [Source:HGNC Symbol;Acc:HGNC:20883]	-0.522613	0.0313725	0.129958	no
hsa-miR-6509-3p	15_78488647_78497311	circRNA	ENSG00000136381	IREB2	iron responsive element binding protein 2 [Source:HGNC Symbol;Acc:HGNC:6115]	-0.558417	0.0198171	0.111337	no
hsa-miR-224-5p	2_120127688_120146289	circRNA	ENSG00000115109	EPB41L5	erythrocyte membrane protein band 4.1 like 5 [Source:HGNC Symbol;Acc:HGNC:19819]	-0.636671	0.00599274	0.0771711	no
hsa-miR-6855-5p	18_36959316_36977223	circRNA	ENSG00000150477	KIAA1328	KIAA1328 [Source:HGNC Symbol;Acc:HGNC:29248]	-0.606837	0.00979385	0.0876022	no
hsa-miR-6780a-5p	14_102194938_102209862	circRNA	ENSG00000140153	WDR20	WD repeat domain 20 [Source:HGNC Symbol;Acc:HGNC:19667]	-0.506438	0.0380364	0.139205	no
hsa-miR-766-3p	13_28266715_28288122	circRNA	ENSG00000152520	PAN3	poly(A) specific ribonuclease subunit PAN3 [Source:HGNC Symbol;Acc:HGNC:29991]	-0.606837	0.00979385	0.0876022	no
hsa-miR-363-5p	13_28256292_28272071	circRNA	ENSG00000152520	PAN3	poly(A) specific ribonuclease subunit PAN3 [Source:HGNC Symbol;Acc:HGNC:29991]	-0.655236	0.00430221	0.0689632	no
hsa-miR-92b-3p	2_24496320_24584560	circRNA	ENSG00000084676	NCOA1	nuclear receptor coactivator 1 [Source:HGNC Symbol;Acc:HGNC:7668]	-0.594468	0.0118455	0.0924212	no
hsa-miR-3180-3p	14_65561337_65629606	circRNA	ENSG00000033170	FUT8	fucosyltransferase 8 [Source:HGNC Symbol;Acc:HGNC:4019]	-0.618486	0.00813066	0.0832493	no
hsa-miR-125a-3p	18_79096476_79176907	circRNA	ENSG00000166377	ATP9B	ATPase phospholipid transporting 9B (putative) [Source:HGNC Symbol;Acc:HGNC:13541]	-0.526675	0.0298494	0.127718	no
hsa-miR-5010-5p	3_149846011_149921227	circRNA	ENSG00000082996	RNF13	ring finger protein 13 [Source:HGNC Symbol;Acc:HGNC:10057]	-0.504902	0.038721	0.140176	no
hsa-miR-6855-5p	14_102194938_102209862	circRNA	ENSG00000140153	WDR20	WD repeat domain 20 [Source:HGNC Symbol;Acc:HGNC:19667]	-0.637646	0.00589238	0.0766612	no
hsa-miR-6855-5p	15_24962114_24968082	circRNA	ENSG00000273173,ENSG00000128739	SNURF,SNRPN		-0.6273	0.00702915	0.0801718	no
hsa-miR-6780a-5p	5_170878097_170896115	circRNA	ENSG00000204764	RANBP17	RAN binding protein 17 [Source:HGNC Symbol;Acc:HGNC:14428]	-0.522744	0.0313223	0.129958	no
hsa-miR-4433b-5p	6_156901376_156935576	circRNA	ENSG00000049618	ARID1B	AT-rich interaction domain 1B [Source:HGNC Symbol;Acc:HGNC:18040]	-0.58037	0.0145843	0.0992083	no
hsa-miR-6825-5p	3_141509568_141540609	circRNA	ENSG00000155903	RASA2	RAS p21 protein activator 2 [Source:HGNC Symbol;Acc:HGNC:9872]	-0.512684	0.0353465	0.135126	no
hsa-miR-6511b-3p	18_79126267_79214038	circRNA	ENSG00000166377	ATP9B	ATPase phospholipid transporting 9B (putative) [Source:HGNC Symbol;Acc:HGNC:13541]	-0.519927	0.0324121	0.130412	no
hsa-miR-363-5p	6_156901376_156935576	circRNA	ENSG00000049618	ARID1B	AT-rich interaction domain 1B [Source:HGNC Symbol;Acc:HGNC:18040]	-0.532349	0.0278179	0.124414	no
hsa-miR-6825-5p	3_128795360_128813471	circRNA	ENSG00000075785	RAB7A	RAB7A, member RAS oncogene family [Source:HGNC Symbol;Acc:HGNC:9788]	-0.537688	0.026005	0.121271	no
hsa-miR-629-3p	12_110503806_110506693	circRNA	ENSG00000151164	RAD9B	RAD9 checkpoint clamp component B [Source:HGNC Symbol;Acc:HGNC:21700]	-0.491188	0.0452571	0.150875	no
hsa-miR-6855-5p	2_24496320_24584560	circRNA	ENSG00000084676	NCOA1	nuclear receptor coactivator 1 [Source:HGNC Symbol;Acc:HGNC:7668]	-0.628968	0.00683481	0.0792511	no
hsa-miR-766-3p	3_18463480_18530185	circRNA				-0.706494	0.00152246	0.0502767	no
hsa-miR-616-3p	3_183736718_183762279	circRNA	ENSG00000163872	YEATS2	YEATS domain containing 2 [Source:HGNC Symbol;Acc:HGNC:25489]	-0.563319	0.0185381	0.108718	no
hsa-miR-1229-3p	3_18463480_18530185	circRNA				-0.492291	0.0447024	0.149976	no
hsa-miR-636	12_100591736_100612141	circRNA	ENSG00000139354	GAS2L3	growth arrest specific 2 like 3 [Source:HGNC Symbol;Acc:HGNC:27475]	-0.531058	0.0282703	0.125534	no
hsa-miR-194-3p	16_15664736_15687511	circRNA	ENSG00000133392,ENSG00000072864	MYH11,NDE1		-0.536083	0.0265403	0.121707	no
hsa-miR-3180-3p	2_32664303_32678922	circRNA	ENSG00000018699	TTC27	tetratricopeptide repeat domain 27 [Source:HGNC Symbol;Acc:HGNC:25986]	-0.727701	0.000929056	0.0436841	no
hsa-miR-6855-5p	6_169759838_169768171	circRNA	ENSG00000130023	ERMARD	ER membrane associated RNA degradation [Source:HGNC Symbol;Acc:HGNC:21056]	-0.598406	0.0111585	0.0906626	no
hsa-miR-3180-3p	6_169759838_169768171	circRNA	ENSG00000130023	ERMARD	ER membrane associated RNA degradation [Source:HGNC Symbol;Acc:HGNC:21056]	-0.531384	0.0281556	0.125534	no
hsa-miR-6825-5p	8_86374030_86381629	circRNA	ENSG00000123124	WWP1	WW domain containing E3 ubiquitin protein ligase 1 [Source:HGNC Symbol;Acc:HGNC:17004]	-0.565942	0.0178808	0.107247	no
hsa-miR-6780a-5p	8_90015541_90021056	circRNA	ENSG00000104325	DECR1	2,4-dienoyl-CoA reductase 1 [Source:HGNC Symbol;Acc:HGNC:2753]	-0.628833	0.00685033	0.0792511	no
hsa-miR-6780a-5p	X_78009102_78020398	circRNA	ENSG00000165240	ATP7A	ATPase copper transporting alpha [Source:HGNC Symbol;Acc:HGNC:869]	-0.622877	0.00756587	0.0818629	no
hsa-miR-629-3p	17_12081356_12113360	circRNA	ENSG00000065559	MAP2K4	mitogen-activated protein kinase kinase 4 [Source:HGNC Symbol;Acc:HGNC:6844]	-0.551109	0.0218507	0.114495	no
hsa-miR-6802-3p	3_183736718_183762279	circRNA	ENSG00000163872	YEATS2	YEATS domain containing 2 [Source:HGNC Symbol;Acc:HGNC:25489]	-0.536021	0.0265609	0.121707	no
hsa-miR-2110	3_141509568_141540609	circRNA	ENSG00000155903	RASA2	RAS p21 protein activator 2 [Source:HGNC Symbol;Acc:HGNC:9872]	-0.769427	0.000304824	0.0335771	no
hsa-miR-6780a-5p	9_36197551_36204179	circRNA	ENSG00000122705	CLTA	clathrin light chain A [Source:HGNC Symbol;Acc:HGNC:2090]	-0.487618	0.0470874	0.153138	no
hsa-miR-3180-3p	3_141509568_141540609	circRNA	ENSG00000155903	RASA2	RAS p21 protein activator 2 [Source:HGNC Symbol;Acc:HGNC:9872]	-0.705133	0.00156927	0.0512266	no
hsa-miR-224-5p	4_42001616_42049479	circRNA	ENSG00000014824	SLC30A9	solute carrier family 30 member 9 [Source:HGNC Symbol;Acc:HGNC:1329]	-0.507652	0.0375017	0.138296	no
hsa-miR-210-5p	18_79126267_79214038	circRNA	ENSG00000166377	ATP9B	ATPase phospholipid transporting 9B (putative) [Source:HGNC Symbol;Acc:HGNC:13541]	-0.529736	0.0287395	0.126445	no
hsa-miR-6780a-5p	9_19286769_19305527	circRNA	ENSG00000137145	DENND4C	DENN domain containing 4C [Source:HGNC Symbol;Acc:HGNC:26079]	-0.824212	4.72839e-05	0.0313655	no
hsa-miR-4685-3p	17_12081356_12113360	circRNA	ENSG00000065559	MAP2K4	mitogen-activated protein kinase kinase 4 [Source:HGNC Symbol;Acc:HGNC:6844]	-0.596824	0.0114306	0.0909578	no
hsa-miR-1226-3p	3_141509568_141540609	circRNA	ENSG00000155903	RASA2	RAS p21 protein activator 2 [Source:HGNC Symbol;Acc:HGNC:9872]	-0.656902	0.00417173	0.0689632	no
hsa-miR-6511a-3p	3_141509568_141540609	circRNA	ENSG00000155903	RASA2	RAS p21 protein activator 2 [Source:HGNC Symbol;Acc:HGNC:9872]	-0.660348	0.00391203	0.0685813	no
hsa-miR-6727-3p	10_12081472_12113064	circRNA	ENSG00000181192	DHTKD1	dehydrogenase E1 and transketolase domain containing 1 [Source:HGNC Symbol;Acc:HGNC:23537]	-0.657827	0.00410072	0.0689632	no
hsa-miR-204-5p	3_18463480_18527326	circRNA				-0.507538	0.0375518	0.138296	no
hsa-miR-363-5p	8_90015541_90021056	circRNA	ENSG00000104325	DECR1	2,4-dienoyl-CoA reductase 1 [Source:HGNC Symbol;Acc:HGNC:2753]	-0.57449	0.0158643	0.102049	no
hsa-miR-6825-5p	5_155854549_155870424	circRNA				-0.677887	0.00278527	0.0598154	no
hsa-miR-6511b-3p	12_98677425_98699569	circRNA	ENSG00000185046,ENSG00000120868	ANKS1B,APAF1		-0.533721	0.0273431	0.123051	no
hsa-miR-629-3p	3_183736718_183762279	circRNA	ENSG00000163872	YEATS2	YEATS domain containing 2 [Source:HGNC Symbol;Acc:HGNC:25489]	-0.563319	0.0185381	0.108718	no
hsa-miR-766-3p	19_5016257_5041251	circRNA	ENSG00000127663	KDM4B	lysine demethylase 4B [Source:HGNC Symbol;Acc:HGNC:29136]	-0.571078	0.0166464	0.104361	no
hsa-miR-6855-5p	19_5016257_5041251	circRNA	ENSG00000127663	KDM4B	lysine demethylase 4B [Source:HGNC Symbol;Acc:HGNC:29136]	-0.566176	0.0178228	0.107247	no
hsa-miR-3127-5p	4_42001616_42049479	circRNA	ENSG00000014824	SLC30A9	solute carrier family 30 member 9 [Source:HGNC Symbol;Acc:HGNC:1329]	-0.543325	0.0241919	0.118559	no
hsa-miR-6780a-5p	3_182884753_182898772	circRNA	ENSG00000058063	ATP11B	ATPase phospholipid transporting 11B (putative) [Source:HGNC Symbol;Acc:HGNC:13553]	-0.48728	0.0472631	0.153227	no
hsa-miR-363-5p	18_36959316_36977223	circRNA	ENSG00000150477	KIAA1328	KIAA1328 [Source:HGNC Symbol;Acc:HGNC:29248]	-0.508501	0.0371312	0.138027	no
hsa-miR-6734-5p	3_149846011_149921227	circRNA	ENSG00000082996	RNF13	ring finger protein 13 [Source:HGNC Symbol;Acc:HGNC:10057]	-0.526961	0.0297444	0.127686	no
hsa-miR-4732-5p	1_65364635_65395032	circRNA	ENSG00000116675	DNAJC6	DnaJ heat shock protein family (Hsp40) member C6 [Source:HGNC Symbol;Acc:HGNC:15469]	-0.496049	0.0428517	0.146887	no
hsa-miR-4732-5p	9_19286769_19305527	circRNA	ENSG00000137145	DENND4C	DENN domain containing 4C [Source:HGNC Symbol;Acc:HGNC:26079]	-0.758223	0.000419938	0.0365503	no
hsa-miR-6511a-3p	15_24962114_24968082	circRNA	ENSG00000273173,ENSG00000128739	SNURF,SNRPN		-0.592107	0.0122732	0.0936876	no
hsa-miR-6799-3p	2_120127688_120146289	circRNA	ENSG00000115109	EPB41L5	erythrocyte membrane protein band 4.1 like 5 [Source:HGNC Symbol;Acc:HGNC:19819]	-0.625199	0.00728012	0.0811251	no
hsa-miR-423-5p	19_5016257_5041251	circRNA	ENSG00000127663	KDM4B	lysine demethylase 4B [Source:HGNC Symbol;Acc:HGNC:29136]	-0.504902	0.038721	0.140176	no
hsa-miR-4732-3p	5_155854549_155870424	circRNA				-0.640098	0.00564593	0.0747556	no
hsa-miR-6511a-3p	3_18463480_18530185	circRNA				-0.614174	0.00871761	0.0845842	no
hsa-miR-6511a-3p	14_102194938_102209862	circRNA	ENSG00000140153	WDR20	WD repeat domain 20 [Source:HGNC Symbol;Acc:HGNC:19667]	-0.52638	0.0299579	0.127718	no
hsa-miR-486-3p	3_130992951_131001344	circRNA	ENSG00000017260	ATP2C1	ATPase secretory pathway Ca2+ transporting 1 [Source:HGNC Symbol;Acc:HGNC:13211]	-0.49256	0.0445681	0.149703	no
hsa-miR-616-3p	1_151231671_151232703	circRNA	ENSG00000143398	PIP5K1A	phosphatidylinositol-4-phosphate 5-kinase type 1 alpha [Source:HGNC Symbol;Acc:HGNC:8994]	-0.702632	0.00165834	0.0532169	no
hsa-miR-1229-3p	19_5016257_5041251	circRNA	ENSG00000127663	KDM4B	lysine demethylase 4B [Source:HGNC Symbol;Acc:HGNC:29136]	-0.497549	0.0421293	0.146179	no
hsa-miR-92b-3p	7_128591850_128609579	circRNA				-0.553502	0.0211679	0.11306	no
hsa-miR-6782-3p	6_110210707_110213160	circRNA	ENSG00000168438	CDC40	cell division cycle 40 [Source:HGNC Symbol;Acc:HGNC:17350]	-0.519849	0.0324424	0.130412	no
hsa-miR-125a-3p	2_97122887_97127134	circRNA	ENSG00000135976	ANKRD36	ankyrin repeat domain 36 [Source:HGNC Symbol;Acc:HGNC:24079]	-0.712873	0.00131815	0.0466046	no
hsa-miR-3180-3p	3_128795360_128813471	circRNA	ENSG00000075785	RAB7A	RAB7A, member RAS oncogene family [Source:HGNC Symbol;Acc:HGNC:9788]	-0.537688	0.026005	0.121271	no
hsa-miR-6747-3p	3_141509568_141540609	circRNA	ENSG00000155903	RASA2	RAS p21 protein activator 2 [Source:HGNC Symbol;Acc:HGNC:9872]	-0.541336	0.0248201	0.120443	no
hsa-miR-6747-3p	3_18463480_18527326	circRNA				-0.617914	0.00820673	0.0832493	no
hsa-miR-6749-3p	7_24623663_24650712	circRNA	ENSG00000105926	MPP6	membrane palmitoylated protein 6 [Source:HGNC Symbol;Acc:HGNC:18167]	-0.513586	0.0349704	0.134301	no
hsa-miR-6511b-3p	4_6967304_7001251	circRNA	ENSG00000132405	TBC1D14	TBC1 domain family member 14 [Source:HGNC Symbol;Acc:HGNC:29246]	-0.599578	0.0109602	0.0903179	no
hsa-miR-6511a-3p	9_19286769_19305527	circRNA	ENSG00000137145	DENND4C	DENN domain containing 4C [Source:HGNC Symbol;Acc:HGNC:26079]	-0.656408	0.00421013	0.0689632	no
hsa-miR-23a-5p	1_65486392_65498770	circRNA	ENSG00000116678	LEPR	leptin receptor [Source:HGNC Symbol;Acc:HGNC:6554]	-0.548939	0.0224849	0.115683	no
hsa-miR-6855-5p	4_6967304_7001251	circRNA	ENSG00000132405	TBC1D14	TBC1 domain family member 14 [Source:HGNC Symbol;Acc:HGNC:29246]	-0.533721	0.0273431	0.123051	no
hsa-miR-92a-1-5p	17_12081356_12113360	circRNA	ENSG00000065559	MAP2K4	mitogen-activated protein kinase kinase 4 [Source:HGNC Symbol;Acc:HGNC:6844]	-0.735772	0.00076086	0.0414409	no
hsa-miR-6511b-3p	6_169759838_169768171	circRNA	ENSG00000130023	ERMARD	ER membrane associated RNA degradation [Source:HGNC Symbol;Acc:HGNC:21056]	-0.485592	0.0481505	0.154255	no
hsa-miR-363-5p	8_67164391_67179926	circRNA	ENSG00000104218	CSPP1	centrosome and spindle pole associated protein 1 [Source:HGNC Symbol;Acc:HGNC:26193]	-0.482955	0.0495608	0.156915	no
hsa-miR-363-5p	5_155854549_155870424	circRNA				-0.687922	0.00227033	0.0566907	no
hsa-miR-6780a-5p	10_12081472_12113064	circRNA	ENSG00000181192	DHTKD1	dehydrogenase E1 and transketolase domain containing 1 [Source:HGNC Symbol;Acc:HGNC:23537]	-0.533429	0.0274436	0.123051	no
hsa-miR-636	12_100591736_100618587	circRNA	ENSG00000139354	GAS2L3	growth arrest specific 2 like 3 [Source:HGNC Symbol;Acc:HGNC:27475]	-0.615196	0.00857557	0.0842721	no
hsa-miR-125a-3p	19_5016257_5041251	circRNA	ENSG00000127663	KDM4B	lysine demethylase 4B [Source:HGNC Symbol;Acc:HGNC:29136]	-0.521588	0.031766	0.129966	no
hsa-miR-6747-3p	2_120127688_120146289	circRNA	ENSG00000115109	EPB41L5	erythrocyte membrane protein band 4.1 like 5 [Source:HGNC Symbol;Acc:HGNC:19819]	-0.679689	0.00268639	0.0596043	no
hsa-miR-1260a	12_110503806_110506693	circRNA	ENSG00000151164	RAD9B	RAD9 checkpoint clamp component B [Source:HGNC Symbol;Acc:HGNC:21700]	-0.536465	0.0264122	0.121707	no
hsa-miR-194-3p	6_169759838_169768171	circRNA	ENSG00000130023	ERMARD	ER membrane associated RNA degradation [Source:HGNC Symbol;Acc:HGNC:21056]	-0.541999	0.0246093	0.120158	no
hsa-miR-363-5p	9_19286769_19305527	circRNA	ENSG00000137145	DENND4C	DENN domain containing 4C [Source:HGNC Symbol;Acc:HGNC:26079]	-0.771162	0.00028962	0.0335771	no
hsa-miR-6855-5p	4_42001616_42049479	circRNA	ENSG00000014824	SLC30A9	solute carrier family 30 member 9 [Source:HGNC Symbol;Acc:HGNC:1329]	-0.530977	0.0282991	0.125534	no
hsa-miR-6825-5p	1_154251041_154257434	circRNA	ENSG00000143569	UBAP2L	ubiquitin associated protein 2 like [Source:HGNC Symbol;Acc:HGNC:29877]	-0.566925	0.0176391	0.106699	no
hsa-miR-6799-3p	8_67172416_67179926	circRNA	ENSG00000104218	CSPP1	centrosome and spindle pole associated protein 1 [Source:HGNC Symbol;Acc:HGNC:26193]	-0.596834	0.0114288	0.0909578	no
hsa-miR-6825-5p	2_120127688_120146289	circRNA	ENSG00000115109	EPB41L5	erythrocyte membrane protein band 4.1 like 5 [Source:HGNC Symbol;Acc:HGNC:19819]	-0.548798	0.0225268	0.115794	no
hsa-miR-574-3p	3_18463480_18527326	circRNA				-0.588135	0.0130203	0.0956732	no
hsa-miR-363-5p	3_18463480_18530185	circRNA				-0.677683	0.00279664	0.0598154	no
hsa-let-7d-3p	14_49723874_49743805	circRNA	ENSG00000197776	KLHDC1	kelch domain containing 1 [Source:HGNC Symbol;Acc:HGNC:19836]	-0.55466	0.0208434	0.112539	no
hsa-miR-363-5p	4_6967304_7001251	circRNA	ENSG00000132405	TBC1D14	TBC1 domain family member 14 [Source:HGNC Symbol;Acc:HGNC:29246]	-0.541953	0.0246239	0.120158	no
hsa-miR-6780a-5p	7_139269394_139279360	circRNA	ENSG00000157741	UBN2	ubinuclein 2 [Source:HGNC Symbol;Acc:HGNC:21931]	-0.554881	0.0207818	0.112527	no
hsa-miR-6780a-5p	15_42558198_42566706	circRNA	ENSG00000137814	HAUS2	HAUS augmin like complex subunit 2 [Source:HGNC Symbol;Acc:HGNC:25530]	-0.524028	0.0308353	0.129512	no
hsa-miR-6882-3p	4_51860543_51891851	circRNA	ENSG00000109184	DCUN1D4	defective in cullin neddylation 1 domain containing 4 [Source:HGNC Symbol;Acc:HGNC:28998]	-0.554237	0.0209614	0.11264	no
hsa-miR-6747-3p	19_34341422_34342455	circRNA	ENSG00000166398	KIAA0355	KIAA0355 [Source:HGNC Symbol;Acc:HGNC:29016]	-0.631135	0.00658887	0.078789	no
hsa-miR-3127-5p	1_154251041_154257434	circRNA	ENSG00000143569	UBAP2L	ubiquitin associated protein 2 like [Source:HGNC Symbol;Acc:HGNC:29877]	-0.546155	0.0233193	0.116788	no
hsa-miR-1976	3_18463480_18527326	circRNA				-0.588135	0.0130203	0.0956732	no
hsa-miR-3180-3p	3_183736718_183762279	circRNA	ENSG00000163872	YEATS2	YEATS domain containing 2 [Source:HGNC Symbol;Acc:HGNC:25489]	-0.527638	0.0294967	0.127505	no
hsa-miR-6780a-5p	7_24623663_24650712	circRNA	ENSG00000105926	MPP6	membrane palmitoylated protein 6 [Source:HGNC Symbol;Acc:HGNC:18167]	-0.538639	0.0256921	0.120987	no
hsa-miR-4732-3p	13_28256292_28272071	circRNA	ENSG00000152520	PAN3	poly(A) specific ribonuclease subunit PAN3 [Source:HGNC Symbol;Acc:HGNC:29991]	-0.551109	0.0218507	0.114495	no
hsa-miR-629-3p	6_156901376_156935576	circRNA	ENSG00000049618	ARID1B	AT-rich interaction domain 1B [Source:HGNC Symbol;Acc:HGNC:18040]	-0.555673	0.0205626	0.111981	no
hsa-miR-3127-5p	2_24496320_24584560	circRNA	ENSG00000084676	NCOA1	nuclear receptor coactivator 1 [Source:HGNC Symbol;Acc:HGNC:7668]	-0.552006	0.0215929	0.113706	no
hsa-miR-6727-3p	3_18463480_18530185	circRNA				-0.540973	0.0249361	0.120443	no
hsa-miR-6894-3p	8_21974670_21990407	circRNA	ENSG00000130227	XPO7	exportin 7 [Source:HGNC Symbol;Acc:HGNC:14108]	-0.49886	0.0415056	0.1449	no
hsa-miR-6780a-5p	6_144781922_144803147	circRNA	ENSG00000152818	UTRN	utrophin [Source:HGNC Symbol;Acc:HGNC:12635]	-0.571429	0.0165647	0.104361	no
hsa-miR-6511b-3p	17_59257122_59267174	circRNA	ENSG00000153982	GDPD1	glycerophosphodiester phosphodiesterase domain containing 1 [Source:HGNC Symbol;Acc:HGNC:20883]	-0.501279	0.040373	0.143137	no
hsa-miR-3619-3p	10_12081472_12113064	circRNA	ENSG00000181192	DHTKD1	dehydrogenase E1 and transketolase domain containing 1 [Source:HGNC Symbol;Acc:HGNC:23537]	-0.493621	0.0440409	0.148458	no
hsa-miR-125a-3p	18_79126267_79214038	circRNA	ENSG00000166377	ATP9B	ATPase phospholipid transporting 9B (putative) [Source:HGNC Symbol;Acc:HGNC:13541]	-0.536714	0.0263288	0.121707	no
hsa-miR-4732-5p	12_42374863_42398994	circRNA	ENSG00000134283	PPHLN1	periphilin 1 [Source:HGNC Symbol;Acc:HGNC:19369]	-0.535868	0.0266126	0.121707	no
hsa-miR-6894-3p	3_18463480_18527326	circRNA				-0.566147	0.01783	0.107247	no
hsa-miR-6825-5p	3_18463480_18527326	circRNA				-0.690955	0.00213102	0.0566907	no
hsa-miR-423-5p	12_42374863_42398994	circRNA	ENSG00000134283	PPHLN1	periphilin 1 [Source:HGNC Symbol;Acc:HGNC:19369]	-0.503985	0.0391341	0.140952	no
hsa-miR-6894-3p	4_51860543_51891851	circRNA	ENSG00000109184	DCUN1D4	defective in cullin neddylation 1 domain containing 4 [Source:HGNC Symbol;Acc:HGNC:28998]	-0.556517	0.020331	0.111852	no
hsa-miR-125a-3p	3_150562542_150568292	circRNA	ENSG00000120742,ENSG00000144895	SERP1,EIF2A		-0.571128	0.0166349	0.104361	no
hsa-miR-92b-3p	12_998324_1028572	circRNA	ENSG00000082805	ERC1	ELKS/RAB6-interacting/CAST family member 1 [Source:HGNC Symbol;Acc:HGNC:17072]	-0.527651	0.0294922	0.127505	no
hsa-miR-1976	3_18463480_18530185	circRNA				-0.511081	0.0360226	0.136079	no
hsa-miR-423-5p	7_139269394_139279360	circRNA	ENSG00000157741	UBN2	ubinuclein 2 [Source:HGNC Symbol;Acc:HGNC:21931]	-0.557347	0.0201053	0.111852	no
hsa-miR-4732-5p	12_100591736_100612141	circRNA	ENSG00000139354	GAS2L3	growth arrest specific 2 like 3 [Source:HGNC Symbol;Acc:HGNC:27475]	-0.645211	0.00515885	0.073125	no
hsa-miR-197-3p	4_51860543_51891851	circRNA	ENSG00000109184	DCUN1D4	defective in cullin neddylation 1 domain containing 4 [Source:HGNC Symbol;Acc:HGNC:28998]	-0.56745	0.0175111	0.106378	no
hsa-miR-22-5p	2_120127688_120146289	circRNA	ENSG00000115109	EPB41L5	erythrocyte membrane protein band 4.1 like 5 [Source:HGNC Symbol;Acc:HGNC:19819]	-0.74565	0.000590096	0.0394323	no
hsa-miR-4685-3p	4_51860543_51891851	circRNA	ENSG00000109184	DCUN1D4	defective in cullin neddylation 1 domain containing 4 [Source:HGNC Symbol;Acc:HGNC:28998]	-0.552418	0.0214751	0.113473	no
hsa-miR-1229-3p	2_24496320_24584560	circRNA	ENSG00000084676	NCOA1	nuclear receptor coactivator 1 [Source:HGNC Symbol;Acc:HGNC:7668]	-0.549352	0.0223632	0.115609	no
hsa-miR-22-5p	8_86374030_86381629	circRNA	ENSG00000123124	WWP1	WW domain containing E3 ubiquitin protein ligase 1 [Source:HGNC Symbol;Acc:HGNC:17004]	-0.586135	0.0134098	0.0965368	no
hsa-miR-23a-5p	18_79126267_79214038	circRNA	ENSG00000166377	ATP9B	ATPase phospholipid transporting 9B (putative) [Source:HGNC Symbol;Acc:HGNC:13541]	-0.55794	0.0199452	0.111615	no
hsa-miR-363-5p	2_24496320_24584560	circRNA	ENSG00000084676	NCOA1	nuclear receptor coactivator 1 [Source:HGNC Symbol;Acc:HGNC:7668]	-0.578545	0.0149726	0.100418	no
hsa-miR-204-5p	14_39177412_39177916	circRNA	ENSG00000100941	PNN	pinin, desmosome associated protein [Source:HGNC Symbol;Acc:HGNC:9162]	-0.590978	0.0124819	0.0940282	no
hsa-miR-616-3p	9_19286769_19305527	circRNA	ENSG00000137145	DENND4C	DENN domain containing 4C [Source:HGNC Symbol;Acc:HGNC:26079]	-0.768574	0.00031254	0.0335771	no
hsa-miR-5010-5p	12_1754258_1784073	circRNA	ENSG00000006831	ADIPOR2	adiponectin receptor 2 [Source:HGNC Symbol;Acc:HGNC:24041]	-0.507616	0.0375176	0.138296	no
hsa-miR-92b-3p	4_51860543_51891851	circRNA	ENSG00000109184	DCUN1D4	defective in cullin neddylation 1 domain containing 4 [Source:HGNC Symbol;Acc:HGNC:28998]	-0.537386	0.026105	0.121439	no
hsa-miR-486-3p	4_6967304_7001251	circRNA	ENSG00000132405	TBC1D14	TBC1 domain family member 14 [Source:HGNC Symbol;Acc:HGNC:29246]	-0.539209	0.0255059	0.120987	no
hsa-miR-6894-3p	3_18463480_18530185	circRNA				-0.622948	0.00755692	0.0818629	no
hsa-miR-23a-5p	17_12081356_12113360	circRNA	ENSG00000065559	MAP2K4	mitogen-activated protein kinase kinase 4 [Source:HGNC Symbol;Acc:HGNC:6844]	-0.576506	0.0154158	0.101526	no
hsa-miR-204-5p	7_24623663_24650712	circRNA	ENSG00000105926	MPP6	membrane palmitoylated protein 6 [Source:HGNC Symbol;Acc:HGNC:18167]	-0.597364	0.0113371	0.0909578	no
hsa-miR-3180	2_32664303_32678922	circRNA	ENSG00000018699	TTC27	tetratricopeptide repeat domain 27 [Source:HGNC Symbol;Acc:HGNC:25986]	-0.727701	0.000929056	0.0436841	no
hsa-miR-629-3p	2_24496320_24584560	circRNA	ENSG00000084676	NCOA1	nuclear receptor coactivator 1 [Source:HGNC Symbol;Acc:HGNC:7668]	-0.536083	0.0265403	0.121707	no
hsa-miR-766-3p	17_12081356_12113360	circRNA	ENSG00000065559	MAP2K4	mitogen-activated protein kinase kinase 4 [Source:HGNC Symbol;Acc:HGNC:6844]	-0.599363	0.0109963	0.0903179	no
hsa-miR-6882-3p	13_28266715_28288122	circRNA	ENSG00000152520	PAN3	poly(A) specific ribonuclease subunit PAN3 [Source:HGNC Symbol;Acc:HGNC:29991]	-0.555058	0.0207329	0.112476	no
hsa-miR-125a-3p	14_102194938_102209862	circRNA	ENSG00000140153	WDR20	WD repeat domain 20 [Source:HGNC Symbol;Acc:HGNC:19667]	-0.613211	0.00885326	0.0845842	no
hsa-miR-6780a-5p	6_156901376_156935576	circRNA	ENSG00000049618	ARID1B	AT-rich interaction domain 1B [Source:HGNC Symbol;Acc:HGNC:18040]	-0.723061	0.00103893	0.0436841	no
hsa-miR-5010-5p	2_172568741_172596023	circRNA	ENSG00000152256	PDK1	pyruvate dehydrogenase kinase 1 [Source:HGNC Symbol;Acc:HGNC:8809]	-0.732066	0.000834639	0.0419535	no
hsa-miR-6780a-5p	4_6967304_7001251	circRNA	ENSG00000132405	TBC1D14	TBC1 domain family member 14 [Source:HGNC Symbol;Acc:HGNC:29246]	-0.535093	0.0268745	0.12251	no
hsa-miR-6782-3p	8_67172416_67179926	circRNA	ENSG00000104218	CSPP1	centrosome and spindle pole associated protein 1 [Source:HGNC Symbol;Acc:HGNC:26193]	-0.544697	0.0237658	0.117484	no
hsa-miR-224-5p	3_183736718_183762279	circRNA	ENSG00000163872	YEATS2	YEATS domain containing 2 [Source:HGNC Symbol;Acc:HGNC:25489]	-0.503761	0.0392358	0.141095	no
hsa-miR-1976	10_20147784_20177409	circRNA	ENSG00000120594	PLXDC2	plexin domain containing 2 [Source:HGNC Symbol;Acc:HGNC:21013]	-0.512957	0.0352325	0.134852	no
hsa-miR-6780a-5p	2_24496320_24584560	circRNA	ENSG00000084676	NCOA1	nuclear receptor coactivator 1 [Source:HGNC Symbol;Acc:HGNC:7668]	-0.538736	0.0256602	0.120987	no
hsa-miR-301b-3p	8_99431537_99521010	circRNA	ENSG00000132549	VPS13B	vacuolar protein sorting 13 homolog B [Source:HGNC Symbol;Acc:HGNC:2183]	-0.58948	0.0127634	0.0949058	no
hsa-miR-3619-3p	14_49723874_49743805	circRNA	ENSG00000197776	KLHDC1	kelch domain containing 1 [Source:HGNC Symbol;Acc:HGNC:19836]	-0.692661	0.00205578	0.0566907	no
hsa-miR-125a-3p	14_65561337_65629606	circRNA	ENSG00000033170	FUT8	fucosyltransferase 8 [Source:HGNC Symbol;Acc:HGNC:4019]	-0.613195	0.00885562	0.0845842	no
hsa-miR-6511b-3p	5_134969939_134975324	circRNA	ENSG00000152705	CATSPER3	cation channel sperm associated 3 [Source:HGNC Symbol;Acc:HGNC:20819]	-0.483917	0.0490428	0.156161	no
hsa-miR-766-3p	3_18463480_18527326	circRNA				-0.640248	0.00563118	0.0747556	no
hsa-miR-6862-5p	17_47590717_47596462	circRNA	ENSG00000141279	NPEPPS	aminopeptidase puromycin sensitive [Source:HGNC Symbol;Acc:HGNC:7900]	-0.522325	0.0314829	0.129958	no
hsa-miR-6511b-3p	3_18463480_18527326	circRNA				-0.684916	0.00241562	0.05773	no
hsa-miR-486-3p	5_155854549_155870424	circRNA				-0.659718	0.00395851	0.0686084	no
hsa-miR-6780a-5p	10_20147784_20177409	circRNA	ENSG00000120594	PLXDC2	plexin domain containing 2 [Source:HGNC Symbol;Acc:HGNC:21013]	-0.673256	0.0030531	0.0621199	no
hsa-miR-6855-5p	12_100591736_100612141	circRNA	ENSG00000139354	GAS2L3	growth arrest specific 2 like 3 [Source:HGNC Symbol;Acc:HGNC:27475]	-0.672508	0.00309823	0.0621835	no
hsa-miR-125a-3p	17_12081356_12113360	circRNA	ENSG00000065559	MAP2K4	mitogen-activated protein kinase kinase 4 [Source:HGNC Symbol;Acc:HGNC:6844]	-0.627346	0.00702369	0.0801718	no
hsa-miR-6780a-5p	2_32664303_32678922	circRNA	ENSG00000018699	TTC27	tetratricopeptide repeat domain 27 [Source:HGNC Symbol;Acc:HGNC:25986]	-0.612062	0.00901733	0.0851467	no
hsa-miR-197-3p	3_19975601_19978403	circRNA	ENSG00000144566,ENSG00000183977	RAB5A,PP2D1		-0.507353	0.0376329	0.138296	no
hsa-miR-6749-3p	14_102194938_102209862	circRNA	ENSG00000140153	WDR20	WD repeat domain 20 [Source:HGNC Symbol;Acc:HGNC:19667]	-0.497854	0.0419835	0.14607	no
hsa-miR-5010-3p	3_18463480_18530185	circRNA				-0.621314	0.00776318	0.0820705	no
hsa-miR-6882-3p	3_18463480_18530185	circRNA				-0.528277	0.0292644	0.127166	no
hsa-miR-5100	2_172568741_172596023	circRNA	ENSG00000152256	PDK1	pyruvate dehydrogenase kinase 1 [Source:HGNC Symbol;Acc:HGNC:8809]	-0.708768	0.00144685	0.0486277	no
hsa-miR-6747-3p	1_65364635_65395032	circRNA	ENSG00000116675	DNAJC6	DnaJ heat shock protein family (Hsp40) member C6 [Source:HGNC Symbol;Acc:HGNC:15469]	-0.502312	0.0398966	0.142524	no
hsa-miR-6894-3p	4_39075965_39086727	circRNA	ENSG00000109790	KLHL5	kelch like family member 5 [Source:HGNC Symbol;Acc:HGNC:6356]	-0.483139	0.0494615	0.156915	no
hsa-miR-6825-5p	10_20147784_20177409	circRNA	ENSG00000120594	PLXDC2	plexin domain containing 2 [Source:HGNC Symbol;Acc:HGNC:21013]	-0.842713	2.17363e-05	0.0293687	no
hsa-miR-23a-5p	8_21974670_21990407	circRNA	ENSG00000130227	XPO7	exportin 7 [Source:HGNC Symbol;Acc:HGNC:14108]	-0.48728	0.0472631	0.153227	no
hsa-miR-204-5p	3_18463480_18530185	circRNA				-0.650632	0.00468006	0.0707906	no
hsa-miR-328-3p	2_120127688_120146289	circRNA	ENSG00000115109	EPB41L5	erythrocyte membrane protein band 4.1 like 5 [Source:HGNC Symbol;Acc:HGNC:19819]	-0.694028	0.00199708	0.0566907	no
hsa-miR-509-3-5p	13_28256292_28272071	circRNA	ENSG00000152520	PAN3	poly(A) specific ribonuclease subunit PAN3 [Source:HGNC Symbol;Acc:HGNC:29991]	-0.516983	0.0335812	0.132087	no
hsa-miR-6799-3p	3_18463480_18530185	circRNA				-0.645114	0.00516774	0.073125	no
hsa-miR-1260a	12_100591736_100618587	circRNA	ENSG00000139354	GAS2L3	growth arrest specific 2 like 3 [Source:HGNC Symbol;Acc:HGNC:27475]	-0.610294	0.00927434	0.0857952	no
hsa-miR-204-5p	8_67172416_67179926	circRNA	ENSG00000104218	CSPP1	centrosome and spindle pole associated protein 1 [Source:HGNC Symbol;Acc:HGNC:26193]	-0.502877	0.0396381	0.141902	no
hsa-miR-6803-3p	15_78488647_78497311	circRNA	ENSG00000136381	IREB2	iron responsive element binding protein 2 [Source:HGNC Symbol;Acc:HGNC:6115]	-0.584486	0.0137378	0.0975385	no
hsa-miR-5010-3p	12_100591736_100618587	circRNA	ENSG00000139354	GAS2L3	growth arrest specific 2 like 3 [Source:HGNC Symbol;Acc:HGNC:27475]	-0.735294	0.000770053	0.0414409	no
hsa-miR-6780a-5p	19_5016257_5041251	circRNA	ENSG00000127663	KDM4B	lysine demethylase 4B [Source:HGNC Symbol;Acc:HGNC:29136]	-0.688725	0.0022327	0.0566907	no
hsa-miR-4732-5p	10_20147784_20177409	circRNA	ENSG00000120594	PLXDC2	plexin domain containing 2 [Source:HGNC Symbol;Acc:HGNC:21013]	-0.681887	0.00256965	0.0588533	no
hsa-miR-125a-3p	18_36959316_36977223	circRNA	ENSG00000150477	KIAA1328	KIAA1328 [Source:HGNC Symbol;Acc:HGNC:29248]	-0.664619	0.00360854	0.066982	no
hsa-miR-6780a-5p	17_47590717_47596462	circRNA	ENSG00000141279	NPEPPS	aminopeptidase puromycin sensitive [Source:HGNC Symbol;Acc:HGNC:7900]	-0.605124	0.0100598	0.088668	no
hsa-miR-92a-1-5p	13_28266715_28288122	circRNA	ENSG00000152520	PAN3	poly(A) specific ribonuclease subunit PAN3 [Source:HGNC Symbol;Acc:HGNC:29991]	-0.574606	0.0158382	0.102049	no
hsa-miR-6799-3p	3_18463480_18527326	circRNA				-0.508724	0.0370344	0.138027	no
hsa-miR-3180-3p	19_5016257_5041251	circRNA	ENSG00000127663	KDM4B	lysine demethylase 4B [Source:HGNC Symbol;Acc:HGNC:29136]	-0.536021	0.0265609	0.121707	no
hsa-miR-6862-5p	15_63553715_63574403	circRNA	ENSG00000140455	AC007950.1	ubiquitin specific peptidase 3 [Source:NCBI gene;Acc:9960]	-0.576641	0.0153862	0.101526	no
hsa-miR-6780a-5p	3_183736718_183762279	circRNA	ENSG00000163872	YEATS2	YEATS domain containing 2 [Source:HGNC Symbol;Acc:HGNC:25489]	-0.555874	0.0205073	0.111981	no
hsa-miR-194-3p	7_128591850_128609579	circRNA				-0.487541	0.0471275	0.153138	no
hsa-miR-6780a-5p	8_67164391_67179926	circRNA	ENSG00000104218	CSPP1	centrosome and spindle pole associated protein 1 [Source:HGNC Symbol;Acc:HGNC:26193]	-0.558417	0.0198171	0.111337	no
hsa-miR-6511b-3p	5_134682373_134688299	circRNA	ENSG00000113615,ENSG00000152700	SEC24A,SAR1B		-0.614252	0.0087067	0.0845842	no
hsa-miR-6859-3p	10_20147784_20177409	circRNA	ENSG00000120594	PLXDC2	plexin domain containing 2 [Source:HGNC Symbol;Acc:HGNC:21013]	-0.574788	0.0157973	0.102049	no
hsa-miR-4732-5p	7_128591850_128609579	circRNA				-0.662482	0.00375794	0.0671316	no
hsa-miR-6782-3p	2_24496320_24584560	circRNA	ENSG00000084676	NCOA1	nuclear receptor coactivator 1 [Source:HGNC Symbol;Acc:HGNC:7668]	-0.610391	0.0092601	0.0857952	no
hsa-miR-4732-5p	12_100591736_100618587	circRNA	ENSG00000139354	GAS2L3	growth arrest specific 2 like 3 [Source:HGNC Symbol;Acc:HGNC:27475]	-0.720588	0.00110174	0.0456379	no
hsa-miR-6862-5p	22_41164053_41170571	circRNA	ENSG00000100393	EP300	E1A binding protein p300 [Source:HGNC Symbol;Acc:HGNC:3373]	-0.511835	0.0357034	0.135468	no
hsa-miR-5100	7_32544694_32554596	circRNA	ENSG00000105778	AVL9	AVL9 cell migration associated [Source:HGNC Symbol;Acc:HGNC:28994]	-0.603311	0.0103474	0.0903179	no
hsa-miR-197-3p	3_141509568_141540609	circRNA	ENSG00000155903	RASA2	RAS p21 protein activator 2 [Source:HGNC Symbol;Acc:HGNC:9872]	-0.507883	0.0374008	0.138296	no
hsa-miR-3180-3p	3_141501949_141529802	circRNA	ENSG00000155903	RASA2	RAS p21 protein activator 2 [Source:HGNC Symbol;Acc:HGNC:9872]	-0.49732	0.042239	0.146195	no
hsa-miR-766-3p	3_141509568_141540609	circRNA	ENSG00000155903	RASA2	RAS p21 protein activator 2 [Source:HGNC Symbol;Acc:HGNC:9872]	-0.518527	0.0329641	0.131486	no
hsa-miR-6780a-5p	14_49723874_49743805	circRNA	ENSG00000197776	KLHDC1	kelch domain containing 1 [Source:HGNC Symbol;Acc:HGNC:19836]	-0.798816	0.000120231	0.0316266	no
hsa-miR-6881-3p	5_155854549_155870424	circRNA				-0.48927	0.0462332	0.151707	no
hsa-miR-6881-3p	12_103976918_103980962	circRNA	ENSG00000139372	TDG	thymine DNA glycosylase [Source:HGNC Symbol;Acc:HGNC:11700]	-0.491156	0.045273	0.150875	no
hsa-miR-6511b-3p	6_156901376_156935576	circRNA	ENSG00000049618	ARID1B	AT-rich interaction domain 1B [Source:HGNC Symbol;Acc:HGNC:18040]	-0.58723	0.0131954	0.0959841	no
hsa-miR-629-3p	3_18463480_18527326	circRNA				-0.61295	0.00889027	0.0845842	no
hsa-miR-3173-5p	8_67164391_67179926	circRNA	ENSG00000104218	CSPP1	centrosome and spindle pole associated protein 1 [Source:HGNC Symbol;Acc:HGNC:26193]	-0.49256	0.0445681	0.149703	no
hsa-miR-3127-5p	2_120127688_120146289	circRNA	ENSG00000115109	EPB41L5	erythrocyte membrane protein band 4.1 like 5 [Source:HGNC Symbol;Acc:HGNC:19819]	-0.808744	8.48413e-05	0.0313655	no
hsa-miR-2110	2_24496320_24584560	circRNA	ENSG00000084676	NCOA1	nuclear receptor coactivator 1 [Source:HGNC Symbol;Acc:HGNC:7668]	-0.663468	0.00368834	0.0671316	no
hsa-miR-363-5p	9_36581644_36583712	circRNA	ENSG00000165304	MELK	maternal embryonic leucine zipper kinase [Source:HGNC Symbol;Acc:HGNC:16870]	-0.49908	0.0414014	0.144876	no
hsa-miR-4732-5p	11_120447874_120459320	circRNA	ENSG00000196914	ARHGEF12	Rho guanine nucleotide exchange factor 12 [Source:HGNC Symbol;Acc:HGNC:14193]	-0.485659	0.048115	0.154229	no
hsa-miR-363-5p	3_18463480_18527326	circRNA				-0.568282	0.0173098	0.106256	no
hsa-miR-1292-5p	7_128591850_128609579	circRNA				-0.656746	0.00418385	0.0689632	no
hsa-miR-6780a-5p	1_65364635_65395032	circRNA	ENSG00000116675	DNAJC6	DnaJ heat shock protein family (Hsp40) member C6 [Source:HGNC Symbol;Acc:HGNC:15469]	-0.538639	0.0256921	0.120987	no
hsa-miR-224-5p	19_5016257_5041251	circRNA	ENSG00000127663	KDM4B	lysine demethylase 4B [Source:HGNC Symbol;Acc:HGNC:29136]	-0.553922	0.0210498	0.113009	no
hsa-miR-6747-3p	10_20147784_20177409	circRNA	ENSG00000120594	PLXDC2	plexin domain containing 2 [Source:HGNC Symbol;Acc:HGNC:21013]	-0.537618	0.0260283	0.12128	no
hsa-miR-4685-3p	14_65561337_65629606	circRNA	ENSG00000033170	FUT8	fucosyltransferase 8 [Source:HGNC Symbol;Acc:HGNC:4019]	-0.510484	0.036277	0.136344	no
hsa-miR-6882-3p	6_144781922_144803147	circRNA	ENSG00000152818	UTRN	utrophin [Source:HGNC Symbol;Acc:HGNC:12635]	-0.527306	0.0296181	0.127578	no
hsa-miR-6855-5p	X_118378419_118393271	circRNA	ENSG00000131725	WDR44	WD repeat domain 44 [Source:HGNC Symbol;Acc:HGNC:30512]	-0.54473	0.0237555	0.117484	no
hsa-miR-23a-5p	3_149846011_149921227	circRNA	ENSG00000082996	RNF13	ring finger protein 13 [Source:HGNC Symbol;Acc:HGNC:10057]	-0.598039	0.0112211	0.0906626	no
hsa-miR-6780a-5p	8_86374030_86381629	circRNA	ENSG00000123124	WWP1	WW domain containing E3 ubiquitin protein ligase 1 [Source:HGNC Symbol;Acc:HGNC:17004]	-0.592604	0.0121821	0.0935057	no
hsa-miR-6780a-5p	14_65721775_65733381	circRNA	ENSG00000033170	FUT8	fucosyltransferase 8 [Source:HGNC Symbol;Acc:HGNC:4019]	-0.590017	0.012662	0.0945672	no
hsa-miR-6734-5p	18_79126267_79214038	circRNA	ENSG00000166377	ATP9B	ATPase phospholipid transporting 9B (putative) [Source:HGNC Symbol;Acc:HGNC:13541]	-0.492949	0.044374	0.149227	no
hsa-miR-5010-3p	12_100591736_100612141	circRNA	ENSG00000139354	GAS2L3	growth arrest specific 2 like 3 [Source:HGNC Symbol;Acc:HGNC:27475]	-0.58069	0.0145171	0.0991068	no
hsa-miR-6894-3p	7_139269394_139279360	circRNA	ENSG00000157741	UBN2	ubinuclein 2 [Source:HGNC Symbol;Acc:HGNC:21931]	-0.557689	0.0200129	0.111852	no
hsa-miR-6511b-3p	9_19286769_19305527	circRNA	ENSG00000137145	DENND4C	DENN domain containing 4C [Source:HGNC Symbol;Acc:HGNC:26079]	-0.718112	0.00116772	0.0462436	no
hsa-miR-509-3-5p	10_12081472_12113064	circRNA	ENSG00000181192	DHTKD1	dehydrogenase E1 and transketolase domain containing 1 [Source:HGNC Symbol;Acc:HGNC:23537]	-0.517241	0.0334774	0.132087	no
hsa-miR-6509-3p	22_41164053_41170571	circRNA	ENSG00000100393	EP300	E1A binding protein p300 [Source:HGNC Symbol;Acc:HGNC:3373]	-0.643862	0.00528398	0.073742	no
hsa-miR-877-5p	18_196637_203190	circRNA	ENSG00000101557	USP14	ubiquitin specific peptidase 14 [Source:HGNC Symbol;Acc:HGNC:12612]	-0.552415	0.021476	0.113473	no
hsa-miR-125a-3p	6_169759838_169768171	circRNA	ENSG00000130023	ERMARD	ER membrane associated RNA degradation [Source:HGNC Symbol;Acc:HGNC:21056]	-0.653927	0.004407	0.0700063	no
hsa-miR-6780a-5p	3_121844453_121857156	circRNA	ENSG00000145088	EAF2	ELL associated factor 2 [Source:HGNC Symbol;Acc:HGNC:23115]	-0.622877	0.00756587	0.0818629	no
hsa-miR-616-3p	2_68502731_68526242	circRNA	ENSG00000169621	APLF	aprataxin and PNKP like factor [Source:HGNC Symbol;Acc:HGNC:28724]	-0.587916	0.0130623	0.0958581	no
hsa-miR-22-5p	17_12081356_12113360	circRNA	ENSG00000065559	MAP2K4	mitogen-activated protein kinase kinase 4 [Source:HGNC Symbol;Acc:HGNC:6844]	-0.502856	0.0396477	0.141902	no
hsa-miR-629-3p	1_22078429_22091501	circRNA	ENSG00000070831	CDC42	cell division cycle 42 [Source:HGNC Symbol;Acc:HGNC:1736]	-0.557314	0.0201144	0.111852	no
hsa-miR-486-3p	3_149846011_149921227	circRNA	ENSG00000082996	RNF13	ring finger protein 13 [Source:HGNC Symbol;Acc:HGNC:10057]	-0.526961	0.0297444	0.127686	no
hsa-miR-6734-5p	18_196637_203190	circRNA	ENSG00000101557	USP14	ubiquitin specific peptidase 14 [Source:HGNC Symbol;Acc:HGNC:12612]	-0.506791	0.0378801	0.138723	no
hsa-miR-6881-3p	12_998324_1028572	circRNA	ENSG00000082805	ERC1	ELKS/RAB6-interacting/CAST family member 1 [Source:HGNC Symbol;Acc:HGNC:17072]	-0.529171	0.028942	0.126845	no
hsa-miR-6511a-3p	3_18463480_18527326	circRNA				-0.685336	0.00239486	0.05773	no
hsa-miR-6509-3p	17_47590717_47596462	circRNA	ENSG00000141279	NPEPPS	aminopeptidase puromycin sensitive [Source:HGNC Symbol;Acc:HGNC:7900]	-0.633803	0.00629591	0.0779102	no
hsa-miR-6780a-5p	3_18463480_18530185	circRNA				-0.7328	0.000819586	0.0419392	no
hsa-miR-3180-3p	4_6967304_7001251	circRNA	ENSG00000132405	TBC1D14	TBC1 domain family member 14 [Source:HGNC Symbol;Acc:HGNC:29246]	-0.618177	0.00817163	0.0832493	no
hsa-miR-1260a	3_18463480_18527326	circRNA				-0.531058	0.0282703	0.125534	no
hsa-miR-3173-5p	14_49723874_49743805	circRNA	ENSG00000197776	KLHDC1	kelch domain containing 1 [Source:HGNC Symbol;Acc:HGNC:19836]	-0.575891	0.0155516	0.101536	no
hsa-miR-6511b-3p	2_172568741_172596023	circRNA	ENSG00000152256	PDK1	pyruvate dehydrogenase kinase 1 [Source:HGNC Symbol;Acc:HGNC:8809]	-0.676885	0.0028415	0.0598154	no
hsa-miR-1976	4_51860543_51891851	circRNA	ENSG00000109184	DCUN1D4	defective in cullin neddylation 1 domain containing 4 [Source:HGNC Symbol;Acc:HGNC:28998]	-0.539892	0.0252842	0.120987	no
hsa-miR-1538	1_154251041_154257434	circRNA	ENSG00000143569	UBAP2L	ubiquitin associated protein 2 like [Source:HGNC Symbol;Acc:HGNC:29877]	-0.621314	0.00776318	0.0820705	no
hsa-miR-3127-5p	6_156901376_156935576	circRNA	ENSG00000049618	ARID1B	AT-rich interaction domain 1B [Source:HGNC Symbol;Acc:HGNC:18040]	-0.718945	0.00114517	0.0462031	no
hsa-miR-6802-3p	4_55411614_55424643	circRNA	ENSG00000134851	TMEM165	transmembrane protein 165 [Source:HGNC Symbol;Acc:HGNC:30760]	-0.52613	0.0300504	0.127718	no
hsa-miR-197-3p	3_18463480_18527326	circRNA				-0.575727	0.015588	0.101536	no
hsa-miR-6825-5p	19_5016257_5041251	circRNA	ENSG00000127663	KDM4B	lysine demethylase 4B [Source:HGNC Symbol;Acc:HGNC:29136]	-0.665064	0.00357807	0.0666342	no
hsa-miR-766-3p	2_24496320_24584560	circRNA	ENSG00000084676	NCOA1	nuclear receptor coactivator 1 [Source:HGNC Symbol;Acc:HGNC:7668]	-0.594468	0.0118455	0.0924212	no
hsa-miR-6881-3p	14_102194938_102209862	circRNA	ENSG00000140153	WDR20	WD repeat domain 20 [Source:HGNC Symbol;Acc:HGNC:19667]	-0.550583	0.0220034	0.114531	no
hsa-miR-197-3p	2_172568741_172596023	circRNA	ENSG00000152256	PDK1	pyruvate dehydrogenase kinase 1 [Source:HGNC Symbol;Acc:HGNC:8809]	-0.609442	0.00940028	0.08598	no
hsa-miR-6780a-5p	6_87215903_87233527	circRNA	ENSG00000188994	ZNF292	zinc finger protein 292 [Source:HGNC Symbol;Acc:HGNC:18410]	-0.629839	0.00673505	0.0792511	no
hsa-miR-423-5p	6_156901376_156935576	circRNA	ENSG00000049618	ARID1B	AT-rich interaction domain 1B [Source:HGNC Symbol;Acc:HGNC:18040]	-0.502164	0.0399648	0.142677	no
hsa-miR-5010-5p	4_128121826_128162317	circRNA	ENSG00000138709	LARP1B	La ribonucleoprotein domain family member 1B [Source:HGNC Symbol;Acc:HGNC:24704]	-0.522734	0.0313263	0.129958	no
hsa-miR-3180-3p	18_79126267_79214038	circRNA	ENSG00000166377	ATP9B	ATPase phospholipid transporting 9B (putative) [Source:HGNC Symbol;Acc:HGNC:13541]	-0.531384	0.0281556	0.125534	no
hsa-miR-92a-1-5p	13_28256292_28272071	circRNA	ENSG00000152520	PAN3	poly(A) specific ribonuclease subunit PAN3 [Source:HGNC Symbol;Acc:HGNC:29991]	-0.692491	0.00206319	0.0566907	no
hsa-miR-6855-5p	14_65561337_65629606	circRNA	ENSG00000033170	FUT8	fucosyltransferase 8 [Source:HGNC Symbol;Acc:HGNC:4019]	-0.599388	0.0109922	0.0903179	no
hsa-miR-3127-5p	4_51860543_51891851	circRNA	ENSG00000109184	DCUN1D4	defective in cullin neddylation 1 domain containing 4 [Source:HGNC Symbol;Acc:HGNC:28998]	-0.496049	0.0428517	0.146887	no
hsa-miR-3180-3p	17_12081356_12113360	circRNA	ENSG00000065559	MAP2K4	mitogen-activated protein kinase kinase 4 [Source:HGNC Symbol;Acc:HGNC:6844]	-0.642846	0.00537979	0.0739968	no
hsa-miR-4433b-5p	19_5016257_5041251	circRNA	ENSG00000127663	KDM4B	lysine demethylase 4B [Source:HGNC Symbol;Acc:HGNC:29136]	-0.573529	0.0160815	0.102886	no
hsa-miR-6882-3p	19_5016257_5041251	circRNA	ENSG00000127663	KDM4B	lysine demethylase 4B [Source:HGNC Symbol;Acc:HGNC:29136]	-0.617141	0.00831027	0.0832493	no
hsa-miR-1976	5_155854549_155870424	circRNA				-0.668302	0.00336244	0.0650885	no
hsa-miR-5010-3p	1_51745536_51765981	circRNA	ENSG00000117859	OSBPL9	oxysterol binding protein like 9 [Source:HGNC Symbol;Acc:HGNC:16386]	-0.631421	0.00655692	0.078789	no
hsa-miR-6734-5p	4_39075965_39086727	circRNA	ENSG00000109790	KLHL5	kelch like family member 5 [Source:HGNC Symbol;Acc:HGNC:6356]	-0.495098	0.0433144	0.147776	no
hsa-miR-6780a-5p	1_51745536_51765981	circRNA	ENSG00000117859	OSBPL9	oxysterol binding protein like 9 [Source:HGNC Symbol;Acc:HGNC:16386]	-0.678002	0.0027789	0.0598154	no
hsa-miR-6747-3p	19_5016257_5041251	circRNA	ENSG00000127663	KDM4B	lysine demethylase 4B [Source:HGNC Symbol;Acc:HGNC:29136]	-0.536765	0.0263119	0.121707	no
hsa-miR-6511b-3p	7_139269394_139279360	circRNA	ENSG00000157741	UBN2	ubinuclein 2 [Source:HGNC Symbol;Acc:HGNC:21931]	-0.662158	0.00378098	0.0671563	no
hsa-miR-4433b-5p	3_18463480_18530185	circRNA				-0.527365	0.0295963	0.127578	no
hsa-miR-363-5p	3_19975601_19978403	circRNA	ENSG00000144566,ENSG00000183977	RAB5A,PP2D1		-0.509804	0.0365681	0.136934	no
hsa-miR-6799-3p	6_156901376_156935576	circRNA	ENSG00000049618	ARID1B	AT-rich interaction domain 1B [Source:HGNC Symbol;Acc:HGNC:18040]	-0.537837	0.025956	0.121271	no
hsa-miR-6734-5p	3_18463480_18527326	circRNA				-0.838774	2.58527e-05	0.0293687	no
hsa-miR-197-3p	13_28256292_28272071	circRNA	ENSG00000152520	PAN3	poly(A) specific ribonuclease subunit PAN3 [Source:HGNC Symbol;Acc:HGNC:29991]	-0.637458	0.00591155	0.0766612	no
hsa-miR-423-5p	4_55411614_55424643	circRNA	ENSG00000134851	TMEM165	transmembrane protein 165 [Source:HGNC Symbol;Acc:HGNC:30760]	-0.529171	0.028942	0.126845	no
hsa-miR-6894-3p	14_49723874_49743805	circRNA	ENSG00000197776	KLHDC1	kelch domain containing 1 [Source:HGNC Symbol;Acc:HGNC:19836]	-0.651926	0.00457127	0.0707488	no
hsa-miR-6511b-3p	14_65561337_65629606	circRNA	ENSG00000033170	FUT8	fucosyltransferase 8 [Source:HGNC Symbol;Acc:HGNC:4019]	-0.533427	0.0274443	0.123051	no
hsa-miR-3180-3p	1_65364635_65395032	circRNA	ENSG00000116675	DNAJC6	DnaJ heat shock protein family (Hsp40) member C6 [Source:HGNC Symbol;Acc:HGNC:15469]	-0.646827	0.00501216	0.0726252	no
hsa-miR-664b-3p	1_65364635_65395032	circRNA	ENSG00000116675	DNAJC6	DnaJ heat shock protein family (Hsp40) member C6 [Source:HGNC Symbol;Acc:HGNC:15469]	-0.504818	0.0387589	0.140223	no
hsa-miR-6881-3p	12_100591736_100612141	circRNA	ENSG00000139354	GAS2L3	growth arrest specific 2 like 3 [Source:HGNC Symbol;Acc:HGNC:27475]	-0.523614	0.0309919	0.129512	no
hsa-miR-6734-5p	2_24496320_24584560	circRNA	ENSG00000084676	NCOA1	nuclear receptor coactivator 1 [Source:HGNC Symbol;Acc:HGNC:7668]	-0.647545	0.00494805	0.0723654	no
hsa-miR-4745-3p	14_102194938_102209862	circRNA	ENSG00000140153	WDR20	WD repeat domain 20 [Source:HGNC Symbol;Acc:HGNC:19667]	-0.521153	0.0319344	0.129966	no
hsa-miR-1229-3p	2_172568741_172596023	circRNA	ENSG00000152256	PDK1	pyruvate dehydrogenase kinase 1 [Source:HGNC Symbol;Acc:HGNC:8809]	-0.52851	0.0291802	0.127166	no
hsa-miR-6780a-5p	2_172568741_172596023	circRNA	ENSG00000152256	PDK1	pyruvate dehydrogenase kinase 1 [Source:HGNC Symbol;Acc:HGNC:8809]	-0.732066	0.000834639	0.0419535	no
hsa-miR-6855-5p	15_75854386_75873568	circRNA	ENSG00000140367	UBE2Q2	ubiquitin conjugating enzyme E2 Q2 [Source:HGNC Symbol;Acc:HGNC:19248]	-0.55637	0.0203713	0.111852	no
hsa-miR-6882-3p	3_18463480_18527326	circRNA				-0.563133	0.0185855	0.108718	no
hsa-miR-6511b-3p	19_5016257_5041251	circRNA	ENSG00000127663	KDM4B	lysine demethylase 4B [Source:HGNC Symbol;Acc:HGNC:29136]	-0.507353	0.0376329	0.138296	no
hsa-miR-6511a-3p	2_24496320_24584560	circRNA	ENSG00000084676	NCOA1	nuclear receptor coactivator 1 [Source:HGNC Symbol;Acc:HGNC:7668]	-0.618732	0.00809818	0.0832493	no
hsa-miR-509-3-5p	19_5016257_5041251	circRNA	ENSG00000127663	KDM4B	lysine demethylase 4B [Source:HGNC Symbol;Acc:HGNC:29136]	-0.697969	0.00183552	0.0554456	no
hsa-miR-5010-3p	3_18463480_18527326	circRNA				-0.724622	0.00100085	0.0436841	no
hsa-miR-6780a-5p	7_128591850_128609579	circRNA				-0.567841	0.0174162	0.106256	no
hsa-miR-4732-5p	11_108327645_108332037	circRNA	ENSG00000149311	ATM	ATM serine/threonine kinase [Source:HGNC Symbol;Acc:HGNC:795]	-0.557314	0.0201144	0.111852	no
hsa-miR-23a-5p	19_5016257_5041251	circRNA	ENSG00000127663	KDM4B	lysine demethylase 4B [Source:HGNC Symbol;Acc:HGNC:29136]	-0.571078	0.0166464	0.104361	no
hsa-miR-6793-3p	3_141509568_141540609	circRNA	ENSG00000155903	RASA2	RAS p21 protein activator 2 [Source:HGNC Symbol;Acc:HGNC:9872]	-0.511998	0.0356346	0.135297	no
hsa-miR-92a-1-5p	1_65364635_65395032	circRNA	ENSG00000116675	DNAJC6	DnaJ heat shock protein family (Hsp40) member C6 [Source:HGNC Symbol;Acc:HGNC:15469]	-0.522384	0.0314601	0.129958	no
hsa-miR-197-3p	3_18463480_18530185	circRNA				-0.618809	0.00808806	0.0832493	no
hsa-miR-1226-3p	19_5016257_5041251	circRNA	ENSG00000127663	KDM4B	lysine demethylase 4B [Source:HGNC Symbol;Acc:HGNC:29136]	-0.541667	0.0247148	0.120395	no
hsa-miR-877-5p	1_154251041_154257434	circRNA	ENSG00000143569	UBAP2L	ubiquitin associated protein 2 like [Source:HGNC Symbol;Acc:HGNC:29877]	-0.622567	0.00760471	0.0818629	no
hsa-miR-616-3p	1_65486392_65498770	circRNA	ENSG00000116678	LEPR	leptin receptor [Source:HGNC Symbol;Acc:HGNC:6554]	-0.649299	0.00479429	0.0713242	no
hsa-miR-6799-3p	10_20147784_20177409	circRNA	ENSG00000120594	PLXDC2	plexin domain containing 2 [Source:HGNC Symbol;Acc:HGNC:21013]	-0.567212	0.0175691	0.10654	no
hsa-miR-224-5p	1_65364635_65395032	circRNA	ENSG00000116675	DNAJC6	DnaJ heat shock protein family (Hsp40) member C6 [Source:HGNC Symbol;Acc:HGNC:15469]	-0.579976	0.0146673	0.0995344	no
hsa-miR-6855-5p	6_156901376_156935576	circRNA	ENSG00000049618	ARID1B	AT-rich interaction domain 1B [Source:HGNC Symbol;Acc:HGNC:18040]	-0.60095	0.0107317	0.0903179	no
hsa-miR-6734-5p	15_92978234_92985673	circRNA	ENSG00000173575	CHD2	chromodomain helicase DNA binding protein 2 [Source:HGNC Symbol;Acc:HGNC:1917]	-0.522059	0.0315848	0.129966	no
hsa-miR-125a-3p	4_6967304_7001251	circRNA	ENSG00000132405	TBC1D14	TBC1 domain family member 14 [Source:HGNC Symbol;Acc:HGNC:29246]	-0.723391	0.00103077	0.0436841	no
hsa-miR-3180-3p	3_149846011_149921227	circRNA	ENSG00000082996	RNF13	ring finger protein 13 [Source:HGNC Symbol;Acc:HGNC:10057]	-0.61295	0.00889027	0.0845842	no
hsa-miR-6780a-5p	15_63553715_63574403	circRNA	ENSG00000140455	AC007950.1	ubiquitin specific peptidase 3 [Source:NCBI gene;Acc:9960]	-0.563692	0.0184435	0.108718	no
hsa-miR-6734-5p	6_156901376_156935576	circRNA	ENSG00000049618	ARID1B	AT-rich interaction domain 1B [Source:HGNC Symbol;Acc:HGNC:18040]	-0.581742	0.0142977	0.0985413	no
hsa-miR-6747-3p	5_155854549_155870424	circRNA				-0.629062	0.006824	0.0792511	no
hsa-miR-6825-5p	2_24496320_24584560	circRNA	ENSG00000084676	NCOA1	nuclear receptor coactivator 1 [Source:HGNC Symbol;Acc:HGNC:7668]	-0.510531	0.0362566	0.136344	no
hsa-miR-6780a-5p	3_18463480_18527326	circRNA				-0.647693	0.00493499	0.0723654	no
hsa-miR-363-5p	2_32664303_32678922	circRNA	ENSG00000018699	TTC27	tetratricopeptide repeat domain 27 [Source:HGNC Symbol;Acc:HGNC:25986]	-0.535871	0.0266113	0.121707	no
hsa-miR-363-5p	12_998324_1028572	circRNA	ENSG00000082805	ERC1	ELKS/RAB6-interacting/CAST family member 1 [Source:HGNC Symbol;Acc:HGNC:17072]	-0.494197	0.0437562	0.148454	no
hsa-miR-6511b-3p	2_24496320_24584560	circRNA	ENSG00000084676	NCOA1	nuclear receptor coactivator 1 [Source:HGNC Symbol;Acc:HGNC:7668]	-0.735123	0.000773368	0.0414409	no
hsa-miR-6511b-3p	3_19975601_19978403	circRNA	ENSG00000144566,ENSG00000183977	RAB5A,PP2D1		-0.502451	0.039833	0.142386	no
hsa-miR-92a-1-5p	2_24496320_24584560	circRNA	ENSG00000084676	NCOA1	nuclear receptor coactivator 1 [Source:HGNC Symbol;Acc:HGNC:7668]	-0.617213	0.00830052	0.0832493	no
hsa-miR-204-5p	8_67164391_67179926	circRNA	ENSG00000104218	CSPP1	centrosome and spindle pole associated protein 1 [Source:HGNC Symbol;Acc:HGNC:26193]	-0.655685	0.00426677	0.0689632	no
hsa-miR-6511b-3p	14_49723874_49743805	circRNA	ENSG00000197776	KLHDC1	kelch domain containing 1 [Source:HGNC Symbol;Acc:HGNC:19836]	-0.634276	0.00624505	0.0779102	no
hsa-miR-6802-3p	1_154251041_154257434	circRNA	ENSG00000143569	UBAP2L	ubiquitin associated protein 2 like [Source:HGNC Symbol;Acc:HGNC:29877]	-0.514839	0.0344531	0.132944	no
hsa-miR-3180-3p	7_24623663_24650712	circRNA	ENSG00000105926	MPP6	membrane palmitoylated protein 6 [Source:HGNC Symbol;Acc:HGNC:18167]	-0.596095	0.0115576	0.091208	no
hsa-miR-363-5p	10_114843741_114848737	circRNA	ENSG00000151553	FAM160B1	family with sequence similarity 160 member B1 [Source:HGNC Symbol;Acc:HGNC:29320]	-0.590616	0.0125495	0.0941626	no
hsa-miR-1292-5p	14_102194938_102209862	circRNA	ENSG00000140153	WDR20	WD repeat domain 20 [Source:HGNC Symbol;Acc:HGNC:19667]	-0.588596	0.0129317	0.0955165	no
hsa-miR-363-5p	3_183736718_183762279	circRNA	ENSG00000163872	YEATS2	YEATS domain containing 2 [Source:HGNC Symbol;Acc:HGNC:25489]	-0.540985	0.0249324	0.120443	no
hsa-miR-197-3p	2_120127688_120146289	circRNA	ENSG00000115109	EPB41L5	erythrocyte membrane protein band 4.1 like 5 [Source:HGNC Symbol;Acc:HGNC:19819]	-0.645274	0.00515305	0.073125	no
hsa-miR-3180-3p	16_15664736_15687511	circRNA	ENSG00000133392,ENSG00000072864	MYH11,NDE1		-0.523966	0.0308585	0.129512	no
hsa-miR-5010-5p	13_28266715_28288122	circRNA	ENSG00000152520	PAN3	poly(A) specific ribonuclease subunit PAN3 [Source:HGNC Symbol;Acc:HGNC:29991]	-0.601662	0.0106147	0.0903179	no
hsa-miR-6511b-3p	3_141509568_141540609	circRNA	ENSG00000155903	RASA2	RAS p21 protein activator 2 [Source:HGNC Symbol;Acc:HGNC:9872]	-0.767907	0.000318693	0.0335771	no
hsa-miR-6780a-5p	17_59257122_59267174	circRNA	ENSG00000153982	GDPD1	glycerophosphodiester phosphodiesterase domain containing 1 [Source:HGNC Symbol;Acc:HGNC:20883]	-0.491353	0.0451737	0.150875	no
hsa-miR-6780a-5p	13_28266715_28288122	circRNA	ENSG00000152520	PAN3	poly(A) specific ribonuclease subunit PAN3 [Source:HGNC Symbol;Acc:HGNC:29991]	-0.641772	0.00548252	0.0740678	no
hsa-miR-6780a-5p	13_28256292_28272071	circRNA	ENSG00000152520	PAN3	poly(A) specific ribonuclease subunit PAN3 [Source:HGNC Symbol;Acc:HGNC:29991]	-0.606982	0.0097716	0.0876022	no
hsa-miR-1260a	2_24496320_24584560	circRNA	ENSG00000084676	NCOA1	nuclear receptor coactivator 1 [Source:HGNC Symbol;Acc:HGNC:7668]	-0.615699	0.00850636	0.0837638	no
hsa-miR-509-3-5p	6_156901376_156935576	circRNA	ENSG00000049618	ARID1B	AT-rich interaction domain 1B [Source:HGNC Symbol;Acc:HGNC:18040]	-0.59573	0.0116218	0.0914293	no
hsa-miR-6511b-3p	3_18463480_18530185	circRNA				-0.536134	0.0265231	0.121707	no
hsa-miR-4685-3p	2_24496320_24584560	circRNA	ENSG00000084676	NCOA1	nuclear receptor coactivator 1 [Source:HGNC Symbol;Acc:HGNC:7668]	-0.655507	0.00428078	0.0689632	no
hsa-miR-423-5p	2_58048827_58089723	circRNA	ENSG00000028116,ENSG00000115392	VRK2,FANCL		-0.527754	0.0294547	0.127505	no
hsa-miR-3173-5p	2_120127688_120146289	circRNA	ENSG00000115109	EPB41L5	erythrocyte membrane protein band 4.1 like 5 [Source:HGNC Symbol;Acc:HGNC:19819]	-0.530559	0.0284469	0.125644	no
hsa-miR-6825-5p	X_78009102_78020398	circRNA	ENSG00000165240	ATP7A	ATPase copper transporting alpha [Source:HGNC Symbol;Acc:HGNC:869]	-0.663317	0.00369899	0.0671316	no
hsa-miR-5100	4_51860543_51891851	circRNA	ENSG00000109184	DCUN1D4	defective in cullin neddylation 1 domain containing 4 [Source:HGNC Symbol;Acc:HGNC:28998]	-0.751589	0.000503719	0.0394072	no
hsa-miR-629-3p	3_18463480_18530185	circRNA				-0.577471	0.0152047	0.100891	no
hsa-miR-2110	7_139269394_139279360	circRNA	ENSG00000157741	UBN2	ubinuclein 2 [Source:HGNC Symbol;Acc:HGNC:21931]	-0.565979	0.0178716	0.107247	no
hsa-miR-629-3p	4_51860543_51891851	circRNA	ENSG00000109184	DCUN1D4	defective in cullin neddylation 1 domain containing 4 [Source:HGNC Symbol;Acc:HGNC:28998]	-0.612545	0.008948	0.0847077	no
hsa-miR-423-5p	3_183736718_183762279	circRNA	ENSG00000163872	YEATS2	YEATS domain containing 2 [Source:HGNC Symbol;Acc:HGNC:25489]	-0.590616	0.0125495	0.0941626	no
hsa-miR-3619-3p	4_51860543_51891851	circRNA	ENSG00000109184	DCUN1D4	defective in cullin neddylation 1 domain containing 4 [Source:HGNC Symbol;Acc:HGNC:28998]	-0.710252	0.00139917	0.0477787	no
hsa-miR-2110	5_169747396_169761625	circRNA	ENSG00000134516	DOCK2	dedicator of cytokinesis 2 [Source:HGNC Symbol;Acc:HGNC:2988]	-0.62784	0.00696575	0.079769	no
hsa-miR-23a-5p	5_155854549_155870424	circRNA				-0.659718	0.00395851	0.0686084	no
hsa-miR-6802-3p	4_6967304_7001251	circRNA	ENSG00000132405	TBC1D14	TBC1 domain family member 14 [Source:HGNC Symbol;Acc:HGNC:29246]	-0.525488	0.0302883	0.128195	no
hsa-miR-197-3p	13_28266715_28288122	circRNA	ENSG00000152520	PAN3	poly(A) specific ribonuclease subunit PAN3 [Source:HGNC Symbol;Acc:HGNC:29991]	-0.534379	0.0271174	0.123051	no
hsa-miR-6511a-3p	15_78488647_78497311	circRNA	ENSG00000136381	IREB2	iron responsive element binding protein 2 [Source:HGNC Symbol;Acc:HGNC:6115]	-0.677513	0.00280614	0.0598154	no
hsa-miR-6855-5p	5_169747396_169761625	circRNA	ENSG00000134516	DOCK2	dedicator of cytokinesis 2 [Source:HGNC Symbol;Acc:HGNC:2988]	-0.645211	0.00515885	0.073125	no
hsa-miR-6862-5p	2_172568741_172596023	circRNA	ENSG00000152256	PDK1	pyruvate dehydrogenase kinase 1 [Source:HGNC Symbol;Acc:HGNC:8809]	-0.683596	0.00248179	0.0582504	no
hsa-miR-6799-3p	19_5016257_5041251	circRNA	ENSG00000127663	KDM4B	lysine demethylase 4B [Source:HGNC Symbol;Acc:HGNC:29136]	-0.698529	0.00181343	0.0554456	no
hsa-miR-3173-5p	19_5016257_5041251	circRNA	ENSG00000127663	KDM4B	lysine demethylase 4B [Source:HGNC Symbol;Acc:HGNC:29136]	-0.612745	0.0089195	0.0847077	no
19_24991	2_120127688_120146289	circRNA	ENSG00000115109	EPB41L5	erythrocyte membrane protein band 4.1 like 5 [Source:HGNC Symbol;Acc:HGNC:19819]	-0.628067	0.00693924	0.079769	no
17_23382	2_120127688_120146289	circRNA	ENSG00000115109	EPB41L5	erythrocyte membrane protein band 4.1 like 5 [Source:HGNC Symbol;Acc:HGNC:19819]	-0.563316	0.0185389	0.108718	no
15_20525	4_6967304_7001251	circRNA	ENSG00000132405	TBC1D14	TBC1 domain family member 14 [Source:HGNC Symbol;Acc:HGNC:29246]	-0.666808	0.00346057	0.0656979	no
19_24991	2_172568741_172596023	circRNA	ENSG00000152256	PDK1	pyruvate dehydrogenase kinase 1 [Source:HGNC Symbol;Acc:HGNC:8809]	-0.546904	0.0230926	0.116585	no
15_20525	1_51745536_51765981	circRNA	ENSG00000117859	OSBPL9	oxysterol binding protein like 9 [Source:HGNC Symbol;Acc:HGNC:16386]	-0.747872	0.00055645	0.0394072	no
19_24991	3_18463480_18527326	circRNA				-0.679953	0.00267214	0.0595205	no
2_4210	3_121844453_121857156	circRNA	ENSG00000145088	EAF2	ELL associated factor 2 [Source:HGNC Symbol;Acc:HGNC:23115]	-0.513687	0.0349284	0.134231	no
19_24991	3_141509568_141540609	circRNA	ENSG00000155903	RASA2	RAS p21 protein activator 2 [Source:HGNC Symbol;Acc:HGNC:9872]	-0.641696	0.00548988	0.0740678	no
17_23382	3_18463480_18530185	circRNA				-0.554242	0.0209601	0.11264	no
15_20525	2_222887830_222909150	circRNA	ENSG00000123983	ACSL3	acyl-CoA synthetase long chain family member 3 [Source:HGNC Symbol;Acc:HGNC:3570]	-0.550911	0.0219082	0.114531	no
1_1081	4_6967304_7001251	circRNA	ENSG00000132405	TBC1D14	TBC1 domain family member 14 [Source:HGNC Symbol;Acc:HGNC:29246]	-0.658576	0.00404393	0.068771	no
17_23382	14_102194938_102209862	circRNA	ENSG00000140153	WDR20	WD repeat domain 20 [Source:HGNC Symbol;Acc:HGNC:19667]	-0.490413	0.0456497	0.151367	no
1_1083	4_6967304_7001251	circRNA	ENSG00000132405	TBC1D14	TBC1 domain family member 14 [Source:HGNC Symbol;Acc:HGNC:29246]	-0.658576	0.00404393	0.068771	no
17_23382	7_32544694_32554596	circRNA	ENSG00000105778	AVL9	AVL9 cell migration associated [Source:HGNC Symbol;Acc:HGNC:28994]	-0.482963	0.0495565	0.156915	no
15_20525	2_24496320_24584560	circRNA	ENSG00000084676	NCOA1	nuclear receptor coactivator 1 [Source:HGNC Symbol;Acc:HGNC:7668]	-0.567929	0.017395	0.106256	no
1_1079	4_6967304_7001251	circRNA	ENSG00000132405	TBC1D14	TBC1 domain family member 14 [Source:HGNC Symbol;Acc:HGNC:29246]	-0.658576	0.00404393	0.068771	no
1_1085	4_6967304_7001251	circRNA	ENSG00000132405	TBC1D14	TBC1 domain family member 14 [Source:HGNC Symbol;Acc:HGNC:29246]	-0.658576	0.00404393	0.068771	no
1_1079	19_5016257_5041251	circRNA	ENSG00000127663	KDM4B	lysine demethylase 4B [Source:HGNC Symbol;Acc:HGNC:29136]	-0.546569	0.0231938	0.116585	no
17_23382	1_51745536_51765981	circRNA	ENSG00000117859	OSBPL9	oxysterol binding protein like 9 [Source:HGNC Symbol;Acc:HGNC:16386]	-0.596073	0.0115616	0.091208	no
17_23382	15_42558198_42566706	circRNA	ENSG00000137814	HAUS2	HAUS augmin like complex subunit 2 [Source:HGNC Symbol;Acc:HGNC:25530]	-0.503059	0.0395548	0.141902	no
2_4210	2_24496320_24584560	circRNA	ENSG00000084676	NCOA1	nuclear receptor coactivator 1 [Source:HGNC Symbol;Acc:HGNC:7668]	-0.533429	0.0274436	0.123051	no
19_24991	3_18463480_18530185	circRNA				-0.507323	0.0376461	0.138296	no
15_20525	2_172568741_172596023	circRNA	ENSG00000152256	PDK1	pyruvate dehydrogenase kinase 1 [Source:HGNC Symbol;Acc:HGNC:8809]	-0.653587	0.0044346	0.0701631	no
1_1081	19_5016257_5041251	circRNA	ENSG00000127663	KDM4B	lysine demethylase 4B [Source:HGNC Symbol;Acc:HGNC:29136]	-0.546569	0.0231938	0.116585	no
1_1083	19_5016257_5041251	circRNA	ENSG00000127663	KDM4B	lysine demethylase 4B [Source:HGNC Symbol;Acc:HGNC:29136]	-0.546569	0.0231938	0.116585	no
22_28029	16_68181475_68183366	circRNA	ENSG00000072736	NFATC3	nuclear factor of activated T cells 3 [Source:HGNC Symbol;Acc:HGNC:7777]	-0.537791	0.0259711	0.121271	no
1_1085	19_5016257_5041251	circRNA	ENSG00000127663	KDM4B	lysine demethylase 4B [Source:HGNC Symbol;Acc:HGNC:29136]	-0.546569	0.0231938	0.116585	no
21_27366	19_5016257_5041251	circRNA	ENSG00000127663	KDM4B	lysine demethylase 4B [Source:HGNC Symbol;Acc:HGNC:29136]	-0.546569	0.0231938	0.116585	no
21_27366	4_6967304_7001251	circRNA	ENSG00000132405	TBC1D14	TBC1 domain family member 14 [Source:HGNC Symbol;Acc:HGNC:29246]	-0.658576	0.00404393	0.068771	no
hsa-miR-6799-3p	2_217814912_217836211	circRNA	ENSG00000079308	TNS1	tensin 1 [Source:HGNC Symbol;Acc:HGNC:11973]	-0.527365	0.0295963	0.127578	no
hsa-miR-6780a-5p	3_149068240_149073322	circRNA	ENSG00000071794	HLTF	helicase like transcription factor [Source:HGNC Symbol;Acc:HGNC:11099]	-0.632715	0.00641405	0.0783479	no
hsa-miR-6881-3p	8_140846260_140890769	circRNA	ENSG00000169398	PTK2	protein tyrosine kinase 2 [Source:HGNC Symbol;Acc:HGNC:9611]	-0.59718	0.0113689	0.0909578	no
hsa-miR-194-3p	3_129838898_129880562	circRNA	ENSG00000172765	TMCC1	transmembrane and coiled-coil domain family 1 [Source:HGNC Symbol;Acc:HGNC:29116]	-0.528252	0.0292735	0.127166	no
hsa-miR-204-5p	14_90961900_90978524	circRNA	ENSG00000100784	RPS6KA5	ribosomal protein S6 kinase A5 [Source:HGNC Symbol;Acc:HGNC:10434]	-0.513218	0.0351233	0.134616	no
hsa-miR-1976	14_31364189_31387375	circRNA	ENSG00000129493	HEATR5A	HEAT repeat containing 5A [Source:HGNC Symbol;Acc:HGNC:20276]	-0.714685	0.00126441	0.0463446	no
hsa-miR-6780a-5p	13_73943981_73995053	circRNA				-0.556375	0.0203698	0.111852	no
hsa-miR-6511a-3p	2_148329960_148342336	circRNA	ENSG00000204406	MBD5	methyl-CpG binding domain protein 5 [Source:HGNC Symbol;Acc:HGNC:20444]	-0.507277	0.0376663	0.138296	no
hsa-miR-1538	1_53860056_53878722	circRNA	ENSG00000058799	YIPF1	Yip1 domain family member 1 [Source:HGNC Symbol;Acc:HGNC:25231]	-0.533429	0.0274436	0.123051	no
hsa-miR-1226-3p	5_55649207_55664863	circRNA	ENSG00000177058	SLC38A9	solute carrier family 38 member 9 [Source:HGNC Symbol;Acc:HGNC:26907]	-0.604249	0.0101977	0.0893874	no
hsa-miR-6780a-5p	5_171964198_171997051	circRNA	ENSG00000072803	FBXW11	F-box and WD repeat domain containing 11 [Source:HGNC Symbol;Acc:HGNC:13607]	-0.605066	0.0100688	0.088668	no
hsa-miR-1260a	7_139371387_139398697	circRNA	ENSG00000146963	LUC7L2	LUC7 like 2, pre-mRNA splicing factor [Source:HGNC Symbol;Acc:HGNC:21608]	-0.576506	0.0154158	0.101526	no
hsa-miR-629-3p	10_101800242_101807901	circRNA	ENSG00000198408	OGA	O-GlcNAcase [Source:HGNC Symbol;Acc:HGNC:7056]	-0.616043	0.00845928	0.0837638	no
hsa-miR-3180-3p	6_107904629_107924932	circRNA	ENSG00000025796	SEC63	SEC63 homolog, protein translocation regulator [Source:HGNC Symbol;Acc:HGNC:21082]	-0.68868	0.00223479	0.0566907	no
hsa-miR-766-3p	3_182947238_182964049	circRNA	ENSG00000043093	DCUN1D1	defective in cullin neddylation 1 domain containing 1 [Source:HGNC Symbol;Acc:HGNC:18184]	-0.5187	0.0328953	0.131418	no
hsa-miR-3180-3p	17_4296717_4331888	circRNA	ENSG00000132388	UBE2G1	ubiquitin conjugating enzyme E2 G1 [Source:HGNC Symbol;Acc:HGNC:12482]	-0.561951	0.0188884	0.109475	no
hsa-miR-6511a-3p	5_55649207_55672695	circRNA	ENSG00000177058	SLC38A9	solute carrier family 38 member 9 [Source:HGNC Symbol;Acc:HGNC:26907]	-0.499699	0.04111	0.144675	no
hsa-miR-3619-3p	6_107904629_107924932	circRNA	ENSG00000025796	SEC63	SEC63 homolog, protein translocation regulator [Source:HGNC Symbol;Acc:HGNC:21082]	-0.662651	0.00374589	0.0671316	no
hsa-miR-486-5p	14_103386041_103428440	circRNA	ENSG00000075413	MARK3	microtubule affinity regulating kinase 3 [Source:HGNC Symbol;Acc:HGNC:6897]	-0.523614	0.0309919	0.129512	no
hsa-miR-6825-5p	16_74942738_74956610	circRNA	ENSG00000103091	WDR59	WD repeat domain 59 [Source:HGNC Symbol;Acc:HGNC:25706]	-0.523966	0.0308585	0.129512	no
hsa-miR-3180-3p	4_145081660_145096111	circRNA	ENSG00000164162	ANAPC10	anaphase promoting complex subunit 10 [Source:HGNC Symbol;Acc:HGNC:24077]	-0.635678	0.00609627	0.0775555	no
hsa-miR-6511b-3p	16_15611592_15623126	circRNA	ENSG00000166783	MARF1	meiosis regulator and mRNA stability factor 1 [Source:HGNC Symbol;Acc:HGNC:29562]	-0.600505	0.0108055	0.0903179	no
hsa-miR-6881-3p	1_212006639_212021212	circRNA	ENSG00000143493	INTS7	integrator complex subunit 7 [Source:HGNC Symbol;Acc:HGNC:24484]	-0.61295	0.00889027	0.0845842	no
hsa-miR-6855-5p	1_65272073_65366196	circRNA	ENSG00000116675	DNAJC6	DnaJ heat shock protein family (Hsp40) member C6 [Source:HGNC Symbol;Acc:HGNC:15469]	-0.574882	0.0157763	0.102049	no
hsa-miR-3127-5p	18_9522160_9525851	circRNA	ENSG00000017797	RALBP1	ralA binding protein 1 [Source:HGNC Symbol;Acc:HGNC:9841]	-0.696993	0.00187451	0.0560379	no
hsa-miR-4732-5p	6_36894504_36916574	circRNA	ENSG00000198663	C6orf89	chromosome 6 open reading frame 89 [Source:HGNC Symbol;Acc:HGNC:21114]	-0.804011	0.000100423	0.0316266	no
hsa-miR-6855-5p	8_99063108_99064287	circRNA	ENSG00000132549	VPS13B	vacuolar protein sorting 13 homolog B [Source:HGNC Symbol;Acc:HGNC:2183]	-0.646948	0.00500131	0.0726252	no
hsa-miR-6882-3p	6_90206569_90271941	circRNA	ENSG00000112182	BACH2	BTB domain and CNC homolog 2 [Source:HGNC Symbol;Acc:HGNC:14078]	-0.682321	0.00254712	0.0585734	no
hsa-miR-6734-5p	2_171447687_171476950	circRNA	ENSG00000115827	DCAF17	DDB1 and CUL4 associated factor 17 [Source:HGNC Symbol;Acc:HGNC:25784]	-0.652853	0.00449456	0.0703282	no
hsa-miR-6894-3p	6_107744949_107772386	circRNA	ENSG00000146285	SCML4	Scm polycomb group protein like 4 [Source:HGNC Symbol;Acc:HGNC:21397]	-0.633337	0.00634627	0.0781926	no
hsa-miR-6747-3p	3_20099862_20152365	circRNA	ENSG00000114166	KAT2B	lysine acetyltransferase 2B [Source:HGNC Symbol;Acc:HGNC:8638]	-0.679953	0.00267214	0.0595205	no
hsa-miR-6734-5p	6_98899268_98934879	circRNA	ENSG00000112234	FBXL4	F-box and leucine rich repeat protein 4 [Source:HGNC Symbol;Acc:HGNC:13601]	-0.583171	0.0140038	0.097717	no
hsa-miR-6894-3p	7_23694891_23702196	circRNA	ENSG00000188732	FAM221A	family with sequence similarity 221 member A [Source:HGNC Symbol;Acc:HGNC:27977]	-0.489187	0.0462759	0.151759	no
hsa-miR-363-5p	1_65272073_65366196	circRNA	ENSG00000116675	DNAJC6	DnaJ heat shock protein family (Hsp40) member C6 [Source:HGNC Symbol;Acc:HGNC:15469]	-0.563905	0.0183895	0.108718	no
hsa-miR-766-3p	9_336582_340321	circRNA	ENSG00000227155,ENSG00000107099	AL161725.1,DOCK8		-0.673014	0.00306765	0.0621199	no
hsa-miR-1260a	10_26500819_26511906	circRNA	ENSG00000077420	APBB1IP	amyloid beta precursor protein binding family B member 1 interacting protein [Source:HGNC Symbol;Acc:HGNC:17379]	-0.584768	0.0136812	0.0973798	no
hsa-miR-636	13_113585774_113640375	circRNA	ENSG00000198176	TFDP1	transcription factor Dp-1 [Source:HGNC Symbol;Acc:HGNC:11749]	-0.631622	0.00653459	0.078789	no
hsa-miR-6862-5p	1_65272073_65366196	circRNA	ENSG00000116675	DNAJC6	DnaJ heat shock protein family (Hsp40) member C6 [Source:HGNC Symbol;Acc:HGNC:15469]	-0.596831	0.0114294	0.0909578	no
hsa-miR-1249-3p	11_2969803_2979237	circRNA	ENSG00000205531	NAP1L4	nucleosome assembly protein 1 like 4 [Source:HGNC Symbol;Acc:HGNC:7640]	-0.486818	0.0475049	0.153748	no
hsa-miR-2110	13_113585774_113640375	circRNA	ENSG00000198176	TFDP1	transcription factor Dp-1 [Source:HGNC Symbol;Acc:HGNC:11749]	-0.565275	0.0180461	0.107444	no
hsa-miR-766-3p	6_35874233_35886811	circRNA	ENSG00000096063,ENSG00000197753	SRPK1,LHFPL5		-0.5658	0.0179157	0.107316	no
hsa-miR-6882-3p	9_109050283_109060452	circRNA	ENSG00000106771	TMEM245	transmembrane protein 245 [Source:HGNC Symbol;Acc:HGNC:1363]	-0.567741	0.0174406	0.10629	no
hsa-miR-5100	7_129857511_129886747	circRNA	ENSG00000186591	UBE2H	ubiquitin conjugating enzyme E2 H [Source:HGNC Symbol;Acc:HGNC:12484]	-0.537386	0.026105	0.121439	no
hsa-miR-6894-3p	1_53860056_53878722	circRNA	ENSG00000058799	YIPF1	Yip1 domain family member 1 [Source:HGNC Symbol;Acc:HGNC:25231]	-0.505873	0.0382871	0.139494	no
hsa-miR-197-3p	10_5959754_5966339	circRNA	ENSG00000134470	IL15RA	interleukin 15 receptor subunit alpha [Source:HGNC Symbol;Acc:HGNC:5978]	-0.690132	0.00216808	0.0566907	no
hsa-miR-766-3p	17_50990450_50998617	circRNA	ENSG00000008294	SPAG9	sperm associated antigen 9 [Source:HGNC Symbol;Acc:HGNC:14524]	-0.591814	0.0123271	0.0936876	no
hsa-miR-23a-5p	4_102714438_102734571	circRNA	ENSG00000109323	MANBA	mannosidase beta [Source:HGNC Symbol;Acc:HGNC:6831]	-0.736506	0.000746905	0.0414409	no
hsa-miR-6881-3p	17_4296717_4331888	circRNA	ENSG00000132388	UBE2G1	ubiquitin conjugating enzyme E2 G1 [Source:HGNC Symbol;Acc:HGNC:12482]	-0.545898	0.0233975	0.116788	no
hsa-miR-6780a-5p	1_233177802_233236980	circRNA	ENSG00000135749	PCNX2	pecanex 2 [Source:HGNC Symbol;Acc:HGNC:8736]	-0.487072	0.0473722	0.153493	no
hsa-miR-6509-3p	7_26169740_26171541	circRNA	ENSG00000050344	NFE2L3	nuclear factor, erythroid 2 like 3 [Source:HGNC Symbol;Acc:HGNC:7783]	-0.496144	0.0428056	0.146887	no
hsa-miR-6882-3p	12_122534664_122539754	circRNA	ENSG00000184445	KNTC1	kinetochore associated 1 [Source:HGNC Symbol;Acc:HGNC:17255]	-0.631227	0.00657857	0.078789	no
hsa-miR-6780a-5p	3_136472413_136502779	circRNA	ENSG00000118007	STAG1	stromal antigen 1 [Source:HGNC Symbol;Acc:HGNC:11354]	-0.590616	0.0125495	0.0941626	no
hsa-miR-6881-3p	3_182947238_182964049	circRNA	ENSG00000043093	DCUN1D1	defective in cullin neddylation 1 domain containing 1 [Source:HGNC Symbol;Acc:HGNC:18184]	-0.690374	0.00215713	0.0566907	no
hsa-miR-92b-3p	3_136472413_136502779	circRNA	ENSG00000118007	STAG1	stromal antigen 1 [Source:HGNC Symbol;Acc:HGNC:11354]	-0.563319	0.0185381	0.108718	no
hsa-miR-6780a-5p	2_61498673_61533903	circRNA	ENSG00000082898	XPO1	exportin 1 [Source:HGNC Symbol;Acc:HGNC:12825]	-0.494175	0.043767	0.148454	no
hsa-miR-125a-3p	10_5768213_5800705	circRNA	ENSG00000057608	GDI2	GDP dissociation inhibitor 2 [Source:HGNC Symbol;Acc:HGNC:4227]	-0.747415	0.00056324	0.0394072	no
hsa-miR-125a-3p	12_47100517_47108164	circRNA	ENSG00000139211	AMIGO2	adhesion molecule with Ig like domain 2 [Source:HGNC Symbol;Acc:HGNC:24073]	-0.486525	0.0476588	0.154036	no
hsa-miR-6881-3p	2_196154968_196163427	circRNA	ENSG00000081320	STK17B	serine/threonine kinase 17b [Source:HGNC Symbol;Acc:HGNC:11396]	-0.766808	0.000329033	0.0335771	no
hsa-miR-197-3p	7_129857511_129951320	circRNA	ENSG00000186591	UBE2H	ubiquitin conjugating enzyme E2 H [Source:HGNC Symbol;Acc:HGNC:12484]	-0.597514	0.0113113	0.0909578	no
hsa-miR-6780a-5p	12_801904_813814	circRNA	ENSG00000060237	WNK1	WNK lysine deficient protein kinase 1 [Source:HGNC Symbol;Acc:HGNC:14540]	-0.724622	0.00100085	0.0436841	no
hsa-miR-6511a-3p	2_207760556_207762376	circRNA				-0.533754	0.0273317	0.123051	no
hsa-miR-4685-3p	7_129857511_129951320	circRNA	ENSG00000186591	UBE2H	ubiquitin conjugating enzyme E2 H [Source:HGNC Symbol;Acc:HGNC:12484]	-0.613798	0.00877043	0.0845842	no
hsa-miR-6855-5p	1_233177802_233236980	circRNA	ENSG00000135749	PCNX2	pecanex 2 [Source:HGNC Symbol;Acc:HGNC:8736]	-0.588602	0.0129306	0.0955165	no
hsa-miR-363-5p	4_102714438_102734571	circRNA	ENSG00000109323	MANBA	mannosidase beta [Source:HGNC Symbol;Acc:HGNC:6831]	-0.617141	0.00831027	0.0832493	no
hsa-miR-6780a-5p	1_176027572_176046324	circRNA	ENSG00000143207	COP1	COP1, E3 ubiquitin ligase [Source:HGNC Symbol;Acc:HGNC:17440]	-0.648651	0.00485069	0.0719371	no
hsa-miR-6780a-5p	15_89877306_89878300	circRNA	ENSG00000157823	AP3S2	adaptor related protein complex 3 subunit sigma 2 [Source:HGNC Symbol;Acc:HGNC:571]	-0.530977	0.0282991	0.125534	no
hsa-miR-6511b-3p	4_102714438_102734571	circRNA	ENSG00000109323	MANBA	mannosidase beta [Source:HGNC Symbol;Acc:HGNC:6831]	-0.718728	0.00115102	0.0462031	no
hsa-miR-486-5p	10_119578726_119588248	circRNA	ENSG00000151923	TIAL1	TIA1 cytotoxic granule associated RNA binding protein like 1 [Source:HGNC Symbol;Acc:HGNC:11804]	-0.626538	0.00711939	0.0803192	no
hsa-miR-204-5p	7_129857511_129951320	circRNA	ENSG00000186591	UBE2H	ubiquitin conjugating enzyme E2 H [Source:HGNC Symbol;Acc:HGNC:12484]	-0.662046	0.00378896	0.0671563	no
hsa-miR-3180-3p	3_136472413_136502779	circRNA	ENSG00000118007	STAG1	stromal antigen 1 [Source:HGNC Symbol;Acc:HGNC:11354]	-0.623116	0.00753607	0.0818629	no
hsa-miR-328-3p	5_60748267_60767903	circRNA				-0.536774	0.0263087	0.121707	no
hsa-miR-3619-3p	19_10163326_10179982	circRNA	ENSG00000130816	DNMT1	DNA methyltransferase 1 [Source:HGNC Symbol;Acc:HGNC:2976]	-0.639998	0.00565583	0.0747556	no
hsa-miR-1538	9_83661777_83669327	circRNA	ENSG00000135018,ENSG00000254473	UBQLN1,AL354920.1		-0.547913	0.0227896	0.116407	no
hsa-miR-197-3p	3_20099862_20152365	circRNA	ENSG00000114166	KAT2B	lysine acetyltransferase 2B [Source:HGNC Symbol;Acc:HGNC:8638]	-0.501279	0.040373	0.143137	no
hsa-miR-1226-3p	1_53860056_53878722	circRNA	ENSG00000058799	YIPF1	Yip1 domain family member 1 [Source:HGNC Symbol;Acc:HGNC:25231]	-0.512198	0.0355506	0.135126	no
hsa-miR-6511a-3p	17_43057052_43074521	circRNA	ENSG00000012048	BRCA1	BRCA1, DNA repair associated [Source:HGNC Symbol;Acc:HGNC:1100]	-0.595451	0.0116709	0.0915618	no
hsa-miR-4433b-5p	1_65272073_65366196	circRNA	ENSG00000116675	DNAJC6	DnaJ heat shock protein family (Hsp40) member C6 [Source:HGNC Symbol;Acc:HGNC:15469]	-0.546069	0.0233455	0.116788	no
hsa-miR-22-5p	2_61498673_61533903	circRNA	ENSG00000082898	XPO1	exportin 1 [Source:HGNC Symbol;Acc:HGNC:12825]	-0.494175	0.043767	0.148454	no
hsa-miR-363-5p	1_95134782_95152552	circRNA	ENSG00000271092,ENSG00000152078	TMEM56-RWDD3,TMEM56		-0.794452	0.000139314	0.0316266	no
hsa-miR-6511a-3p	8_19704761_19715024	circRNA	ENSG00000147408	CSGALNACT1	chondroitin sulfate N-acetylgalactosaminyltransferase 1 [Source:HGNC Symbol;Acc:HGNC:24290]	-0.766856	0.000328579	0.0335771	no
hsa-miR-6799-3p	8_100274953_100288267	circRNA	ENSG00000034677,ENSG00000104450	RNF19A,SPAG1		-0.739045	0.000700249	0.0414409	no
hsa-miR-18b-3p	1_207655190_207683957	circRNA	ENSG00000197721	CR1L	complement C3b/C4b receptor 1 like [Source:HGNC Symbol;Acc:HGNC:2335]	-0.494175	0.043767	0.148454	no
hsa-miR-363-5p	1_37864312_37868614	circRNA	ENSG00000204084	INPP5B	inositol polyphosphate-5-phosphatase B [Source:HGNC Symbol;Acc:HGNC:6077]	-0.526113	0.0300568	0.127718	no
hsa-miR-6802-3p	6_33085779_33128098	circRNA				-0.501582	0.0402329	0.143005	no
hsa-miR-3180-3p	7_139371387_139398697	circRNA	ENSG00000146963	LUC7L2	LUC7 like 2, pre-mRNA splicing factor [Source:HGNC Symbol;Acc:HGNC:21608]	-0.593989	0.0119312	0.0929621	no
hsa-miR-6780a-5p	2_171447687_171476950	circRNA	ENSG00000115827	DCAF17	DDB1 and CUL4 associated factor 17 [Source:HGNC Symbol;Acc:HGNC:25784]	-0.528121	0.0293212	0.127166	no
hsa-miR-423-5p	13_113585774_113640375	circRNA	ENSG00000198176	TFDP1	transcription factor Dp-1 [Source:HGNC Symbol;Acc:HGNC:11749]	-0.599776	0.0109271	0.0903179	no
hsa-miR-766-3p	15_43021275_43025429	circRNA	ENSG00000159459	UBR1	ubiquitin protein ligase E3 component n-recognin 1 [Source:HGNC Symbol;Acc:HGNC:16808]	-0.565112	0.0180866	0.10746	no
hsa-miR-9903	10_28595733_28608431	circRNA	ENSG00000254635,ENSG00000095787	WAC-AS1,WAC		-0.57598	0.0155318	0.101536	no
hsa-miR-92a-1-5p	15_25393746_25415842	circRNA	ENSG00000114062	UBE3A	ubiquitin protein ligase E3A [Source:HGNC Symbol;Acc:HGNC:12496]	-0.726404	0.000958755	0.0436841	no
hsa-miR-197-3p	9_109050283_109060452	circRNA	ENSG00000106771	TMEM245	transmembrane protein 245 [Source:HGNC Symbol;Acc:HGNC:1363]	-0.560198	0.0193447	0.110269	no
hsa-miR-363-5p	5_134167170_134174022	circRNA	ENSG00000272772,ENSG00000113558	AC104109.3,SKP1		-0.69094	0.00213166	0.0566907	no
hsa-miR-6862-5p	3_20099862_20152365	circRNA	ENSG00000114166	KAT2B	lysine acetyltransferase 2B [Source:HGNC Symbol;Acc:HGNC:8638]	-0.78865	0.000168567	0.0316266	no
hsa-miR-6734-5p	7_148828740_148847305	circRNA	ENSG00000106462	EZH2	enhancer of zeste 2 polycomb repressive complex 2 subunit [Source:HGNC Symbol;Acc:HGNC:3527]	-0.713649	0.00129492	0.0463446	no
hsa-miR-6855-5p	3_136472413_136502779	circRNA	ENSG00000118007	STAG1	stromal antigen 1 [Source:HGNC Symbol;Acc:HGNC:11354]	-0.712214	0.00133815	0.046918	no
hsa-miR-4804-5p	7_129857511_129951320	circRNA	ENSG00000186591	UBE2H	ubiquitin conjugating enzyme E2 H [Source:HGNC Symbol;Acc:HGNC:12484]	-0.48227	0.0499326	0.157565	no
hsa-miR-5100	2_144208603_144237339	circRNA	ENSG00000121964	GTDC1	glycosyltransferase like domain containing 1 [Source:HGNC Symbol;Acc:HGNC:20887]	-0.578545	0.0149726	0.100418	no
hsa-miR-6511a-3p	14_103386041_103428440	circRNA	ENSG00000075413	MARK3	microtubule affinity regulating kinase 3 [Source:HGNC Symbol;Acc:HGNC:6897]	-0.507794	0.0374394	0.138296	no
hsa-miR-6881-3p	6_33085779_33128098	circRNA				-0.573237	0.0161481	0.102886	no
hsa-miR-6881-3p	5_180851381_180859006	circRNA	ENSG00000196670	ZFP62	ZFP62 zinc finger protein [Source:HGNC Symbol;Acc:HGNC:23241]	-0.612013	0.00902436	0.0851467	no
hsa-miR-6855-5p	7_139371387_139398697	circRNA	ENSG00000146963	LUC7L2	LUC7 like 2, pre-mRNA splicing factor [Source:HGNC Symbol;Acc:HGNC:21608]	-0.647617	0.00494168	0.0723654	no
hsa-miR-6747-3p	13_113585774_113640375	circRNA	ENSG00000198176	TFDP1	transcription factor Dp-1 [Source:HGNC Symbol;Acc:HGNC:11749]	-0.520159	0.032321	0.130412	no
hsa-miR-6799-3p	9_123440360_123454779	circRNA	ENSG00000119522,ENSG00000148204	DENND1A,CRB2		-0.54139	0.0248028	0.120443	no
hsa-miR-23a-5p	1_65272073_65366196	circRNA	ENSG00000116675	DNAJC6	DnaJ heat shock protein family (Hsp40) member C6 [Source:HGNC Symbol;Acc:HGNC:15469]	-0.544697	0.0237658	0.117484	no
hsa-miR-1229-3p	5_55649207_55664863	circRNA	ENSG00000177058	SLC38A9	solute carrier family 38 member 9 [Source:HGNC Symbol;Acc:HGNC:26907]	-0.531791	0.0280126	0.125186	no
hsa-miR-636	7_103682116_103701006	circRNA	ENSG00000189056	RELN	reelin [Source:HGNC Symbol;Acc:HGNC:9957]	-0.489816	0.045954	0.151541	no
hsa-miR-363-5p	13_49976333_50027406	circRNA				-0.521372	0.0318494	0.129966	no
hsa-miR-3180-3p	9_77247259_77252352	circRNA	ENSG00000197969	VPS13A	vacuolar protein sorting 13 homolog A [Source:HGNC Symbol;Acc:HGNC:1908]	-0.5	0.040969	0.144357	no
hsa-miR-6734-5p	22_42516011_42577098	circRNA				-0.527284	0.029626	0.127578	no
hsa-miR-486-3p	12_49990684_49992655	circRNA	ENSG00000161800	RACGAP1	Rac GTPase activating protein 1 [Source:HGNC Symbol;Acc:HGNC:9804]	-0.523605	0.0309951	0.129512	no
hsa-miR-21-3p	8_11852610_11864463	circRNA	ENSG00000164733	CTSB	cathepsin B [Source:HGNC Symbol;Acc:HGNC:2527]	-0.507935	0.0373779	0.138296	no
hsa-miR-6727-3p	5_55649207_55664863	circRNA	ENSG00000177058	SLC38A9	solute carrier family 38 member 9 [Source:HGNC Symbol;Acc:HGNC:26907]	-0.626237	0.00715519	0.0803192	no
hsa-miR-6780a-5p	8_42459896_42472654	circRNA	ENSG00000168575	SLC20A2	solute carrier family 20 member 2 [Source:HGNC Symbol;Acc:HGNC:10947]	-0.679392	0.0027025	0.0597283	no
hsa-miR-616-3p	22_42516011_42577098	circRNA				-0.491723	0.0449873	0.150737	no
hsa-miR-6727-3p	8_124495472_124516030	circRNA	ENSG00000147687	TATDN1	TatD DNase domain containing 1 [Source:HGNC Symbol;Acc:HGNC:24220]	-0.499709	0.0411053	0.144675	no
hsa-miR-509-3-5p	17_4296717_4331888	circRNA	ENSG00000132388	UBE2G1	ubiquitin conjugating enzyme E2 G1 [Source:HGNC Symbol;Acc:HGNC:12482]	-0.559804	0.0194484	0.110269	no
hsa-miR-4685-3p	11_16014942_16049938	circRNA	ENSG00000110693	SOX6	SRY-box 6 [Source:HGNC Symbol;Acc:HGNC:16421]	-0.593037	0.0121033	0.0934061	no
hsa-miR-629-3p	7_129857511_129951320	circRNA	ENSG00000186591	UBE2H	ubiquitin conjugating enzyme E2 H [Source:HGNC Symbol;Acc:HGNC:12484]	-0.613798	0.00877043	0.0845842	no
hsa-miR-210-5p	21_15014344_15045323	circRNA	ENSG00000180530	NRIP1	nuclear receptor interacting protein 1 [Source:HGNC Symbol;Acc:HGNC:8001]	-0.583333	0.0139708	0.097717	no
hsa-miR-204-5p	1_65272073_65366196	circRNA	ENSG00000116675	DNAJC6	DnaJ heat shock protein family (Hsp40) member C6 [Source:HGNC Symbol;Acc:HGNC:15469]	-0.62929	0.00679776	0.0792511	no
hsa-miR-6894-3p	12_89459638_89525204	circRNA	ENSG00000139323	POC1B	POC1 centriolar protein B [Source:HGNC Symbol;Acc:HGNC:30836]	-0.519171	0.0327094	0.131253	no
hsa-miR-363-5p	9_336582_340321	circRNA	ENSG00000227155,ENSG00000107099	AL161725.1,DOCK8		-0.693331	0.00202683	0.0566907	no
hsa-miR-6862-5p	11_77611315_77629899	circRNA				-0.522325	0.0314829	0.129958	no
hsa-miR-1260a	3_47169169_47175828	circRNA				-0.538736	0.0256602	0.120987	no
hsa-miR-629-3p	13_79365578_79378907	circRNA	ENSG00000139746	RBM26	RNA binding motif protein 26 [Source:HGNC Symbol;Acc:HGNC:20327]	-0.59131	0.0124202	0.0936876	no
hsa-miR-125a-3p	4_102714438_102734571	circRNA	ENSG00000109323	MANBA	mannosidase beta [Source:HGNC Symbol;Acc:HGNC:6831]	-0.647789	0.00492644	0.0723654	no
hsa-miR-6862-5p	10_96544076_96576829	circRNA	ENSG00000077147	TM9SF3	transmembrane 9 superfamily member 3 [Source:HGNC Symbol;Acc:HGNC:21529]	-0.626246	0.00715419	0.0803192	no
hsa-miR-363-5p	17_63760914_63766194	circRNA	ENSG00000108588	CCDC47	coiled-coil domain containing 47 [Source:HGNC Symbol;Acc:HGNC:24856]	-0.638872	0.00576809	0.0756775	no
hsa-miR-6780a-5p	14_103405076_103413800	circRNA	ENSG00000075413	MARK3	microtubule affinity regulating kinase 3 [Source:HGNC Symbol;Acc:HGNC:6897]	-0.506791	0.0378801	0.138723	no
hsa-miR-197-3p	16_15611592_15623126	circRNA	ENSG00000166783	MARF1	meiosis regulator and mRNA stability factor 1 [Source:HGNC Symbol;Acc:HGNC:29562]	-0.583242	0.0139895	0.097717	no
hsa-miR-6862-5p	7_92457552_92492286	circRNA				-0.518155	0.0331118	0.131983	no
hsa-miR-194-3p	1_95134782_95152552	circRNA	ENSG00000271092,ENSG00000152078	TMEM56-RWDD3,TMEM56		-0.812567	7.37893e-05	0.0313655	no
hsa-miR-6894-3p	7_152194009_152199459	circRNA	ENSG00000055609	KMT2C	lysine methyltransferase 2C [Source:HGNC Symbol;Acc:HGNC:13726]	-0.667499	0.00341485	0.0650885	no
hsa-miR-6749-3p	1_207652547_207657351	circRNA	ENSG00000197721	CR1L	complement C3b/C4b receptor 1 like [Source:HGNC Symbol;Acc:HGNC:2335]	-0.576506	0.0154158	0.101526	no
hsa-miR-6780a-5p	11_2969803_2979237	circRNA	ENSG00000205531	NAP1L4	nucleosome assembly protein 1 like 4 [Source:HGNC Symbol;Acc:HGNC:7640]	-0.605763	0.00995986	0.0882843	no
hsa-miR-1260a	6_36894504_36916574	circRNA	ENSG00000198663	C6orf89	chromosome 6 open reading frame 89 [Source:HGNC Symbol;Acc:HGNC:21114]	-0.622903	0.00756262	0.0818629	no
hsa-miR-4685-3p	7_156734177_156826744	circRNA	ENSG00000105983	LMBR1	limb development membrane protein 1 [Source:HGNC Symbol;Acc:HGNC:13243]	-0.496856	0.0424619	0.146616	no
hsa-miR-5100	8_140846260_140890769	circRNA	ENSG00000169398	PTK2	protein tyrosine kinase 2 [Source:HGNC Symbol;Acc:HGNC:9611]	-0.507664	0.0374964	0.138296	no
hsa-miR-6793-3p	6_36894504_36916574	circRNA	ENSG00000198663	C6orf89	chromosome 6 open reading frame 89 [Source:HGNC Symbol;Acc:HGNC:21114]	-0.562192	0.0188263	0.109227	no
hsa-miR-6734-5p	13_73943981_73995053	circRNA				-0.656005	0.00424157	0.0689632	no
hsa-miR-125a-3p	8_140846260_140890769	circRNA	ENSG00000169398	PTK2	protein tyrosine kinase 2 [Source:HGNC Symbol;Acc:HGNC:9611]	-0.629251	0.0068023	0.0792511	no
hsa-miR-6855-5p	2_171447687_171476950	circRNA	ENSG00000115827	DCAF17	DDB1 and CUL4 associated factor 17 [Source:HGNC Symbol;Acc:HGNC:25784]	-0.668776	0.00333175	0.0650885	no
hsa-miR-4732-5p	1_65272073_65366196	circRNA	ENSG00000116675	DNAJC6	DnaJ heat shock protein family (Hsp40) member C6 [Source:HGNC Symbol;Acc:HGNC:15469]	-0.546069	0.0233455	0.116788	no
hsa-miR-6747-3p	20_62854016_62860308	circRNA	ENSG00000101190	TCFL5	transcription factor like 5 [Source:HGNC Symbol;Acc:HGNC:11646]	-0.700623	0.00173288	0.0539317	no
hsa-miR-18b-3p	1_65272073_65366196	circRNA	ENSG00000116675	DNAJC6	DnaJ heat shock protein family (Hsp40) member C6 [Source:HGNC Symbol;Acc:HGNC:15469]	-0.4857	0.0480935	0.154229	no
hsa-miR-3127-5p	10_73467553_73479517	circRNA	ENSG00000107758	PPP3CB	protein phosphatase 3 catalytic subunit beta [Source:HGNC Symbol;Acc:HGNC:9315]	-0.742821	0.000635374	0.0406108	no
hsa-miR-363-5p	9_37349357_37357459	circRNA	ENSG00000147905	ZCCHC7	zinc finger CCHC-type containing 7 [Source:HGNC Symbol;Acc:HGNC:26209]	-0.529171	0.028942	0.126845	no
hsa-miR-3180	5_171964198_171997051	circRNA	ENSG00000072803	FBXW11	F-box and WD repeat domain containing 11 [Source:HGNC Symbol;Acc:HGNC:13607]	-0.714029	0.00128364	0.0463446	no
hsa-miR-766-3p	10_101800242_101807901	circRNA	ENSG00000198408	OGA	O-GlcNAcase [Source:HGNC Symbol;Acc:HGNC:7056]	-0.525488	0.0302883	0.128195	no
hsa-miR-3180-3p	6_36894504_36916574	circRNA	ENSG00000198663	C6orf89	chromosome 6 open reading frame 89 [Source:HGNC Symbol;Acc:HGNC:21114]	-0.770985	0.000291142	0.0335771	no
hsa-miR-92b-3p	5_180851381_180859006	circRNA	ENSG00000196670	ZFP62	ZFP62 zinc finger protein [Source:HGNC Symbol;Acc:HGNC:23241]	-0.714231	0.00127772	0.0463446	no
hsa-miR-4732-5p	21_15014344_15045323	circRNA	ENSG00000180530	NRIP1	nuclear receptor interacting protein 1 [Source:HGNC Symbol;Acc:HGNC:8001]	-0.522059	0.0315848	0.129966	no
hsa-miR-6780a-5p	5_73041291_73056107	circRNA	ENSG00000157107	FCHO2	FCH domain only 2 [Source:HGNC Symbol;Acc:HGNC:25180]	-0.512255	0.0355265	0.135126	no
hsa-miR-6780a-5p	10_68459104_68465812	circRNA	ENSG00000138346	DNA2	DNA replication helicase/nuclease 2 [Source:HGNC Symbol;Acc:HGNC:2939]	-0.54365	0.0240905	0.118559	no
hsa-miR-2110	2_10600853_10607311	circRNA	ENSG00000115761	NOL10	nucleolar protein 10 [Source:HGNC Symbol;Acc:HGNC:25862]	-0.483139	0.0494615	0.156915	no
hsa-miR-6894-3p	15_65715478_65741784	circRNA	ENSG00000174485	DENND4A	DENN domain containing 4A [Source:HGNC Symbol;Acc:HGNC:24321]	-0.552718	0.0213897	0.11344	no
hsa-miR-328-3p	17_43057052_43074521	circRNA	ENSG00000012048	BRCA1	BRCA1, DNA repair associated [Source:HGNC Symbol;Acc:HGNC:1100]	-0.567841	0.0174162	0.106256	no
hsa-miR-6894-3p	2_144208603_144237339	circRNA	ENSG00000121964	GTDC1	glycosyltransferase like domain containing 1 [Source:HGNC Symbol;Acc:HGNC:20887]	-0.533756	0.027331	0.123051	no
hsa-miR-6780a-5p	19_10163326_10179982	circRNA	ENSG00000130816	DNMT1	DNA methyltransferase 1 [Source:HGNC Symbol;Acc:HGNC:2976]	-0.581586	0.0143301	0.0985413	no
hsa-miR-5010-3p	11_16014942_16049938	circRNA	ENSG00000110693	SOX6	SRY-box 6 [Source:HGNC Symbol;Acc:HGNC:16421]	-0.582392	0.0141633	0.0982269	no
hsa-miR-1260a	20_49072286_49075520	circRNA	ENSG00000124207	CSE1L	chromosome segregation 1 like [Source:HGNC Symbol;Acc:HGNC:2431]	-0.50628	0.0381063	0.139343	no
hsa-miR-4685-3p	12_95988193_95990532	circRNA	ENSG00000084110	HAL	histidine ammonia-lyase [Source:HGNC Symbol;Acc:HGNC:4806]	-0.609442	0.00940028	0.08598	no
hsa-miR-1260a	5_55649207_55664863	circRNA	ENSG00000177058	SLC38A9	solute carrier family 38 member 9 [Source:HGNC Symbol;Acc:HGNC:26907]	-0.628833	0.00685033	0.0792511	no
hsa-miR-486-3p	5_60748267_60767903	circRNA				-0.593037	0.0121033	0.0934061	no
hsa-miR-3127-5p	15_92900786_92929091	circRNA	ENSG00000173575	CHD2	chromodomain helicase DNA binding protein 2 [Source:HGNC Symbol;Acc:HGNC:1917]	-0.598061	0.0112174	0.0906626	no
hsa-miR-3180-3p	1_61111371_61163075	circRNA	ENSG00000162599	NFIA	nuclear factor I A [Source:HGNC Symbol;Acc:HGNC:7784]	-0.517588	0.0333384	0.132087	no
hsa-miR-363-5p	17_50990450_50998617	circRNA	ENSG00000008294	SPAG9	sperm associated antigen 9 [Source:HGNC Symbol;Acc:HGNC:14524]	-0.607737	0.00965643	0.0870612	no
hsa-miR-629-3p	12_122534664_122539754	circRNA	ENSG00000184445	KNTC1	kinetochore associated 1 [Source:HGNC Symbol;Acc:HGNC:17255]	-0.67504	0.00294754	0.060223	no
hsa-miR-6511a-3p	13_113585774_113640375	circRNA	ENSG00000198176	TFDP1	transcription factor Dp-1 [Source:HGNC Symbol;Acc:HGNC:11749]	-0.600143	0.0108656	0.0903179	no
hsa-miR-6894-3p	6_36894504_36916574	circRNA	ENSG00000198663	C6orf89	chromosome 6 open reading frame 89 [Source:HGNC Symbol;Acc:HGNC:21114]	-0.683691	0.00247697	0.0582504	no
hsa-miR-6894-3p	13_73943981_73995053	circRNA				-0.516581	0.0337434	0.132087	no
hsa-miR-328-3p	17_4296717_4331888	circRNA	ENSG00000132388	UBE2G1	ubiquitin conjugating enzyme E2 G1 [Source:HGNC Symbol;Acc:HGNC:12482]	-0.667546	0.00341176	0.0650885	no
hsa-miR-125a-3p	10_68355353_68364113	circRNA	ENSG00000204130	RUFY2	RUN and FYVE domain containing 2 [Source:HGNC Symbol;Acc:HGNC:19761]	-0.5281	0.0293287	0.127166	no
hsa-miR-6882-3p	14_31364189_31387375	circRNA	ENSG00000129493	HEATR5A	HEAT repeat containing 5A [Source:HGNC Symbol;Acc:HGNC:20276]	-0.50893	0.0369453	0.138027	no
hsa-miR-6802-3p	2_144208603_144237339	circRNA	ENSG00000121964	GTDC1	glycosyltransferase like domain containing 1 [Source:HGNC Symbol;Acc:HGNC:20887]	-0.520159	0.032321	0.130412	no
hsa-miR-125a-3p	21_46349012_46351540	circRNA	ENSG00000160299	PCNT	pericentrin [Source:HGNC Symbol;Acc:HGNC:16068]	-0.60215	0.0105351	0.0903179	no
hsa-miR-5010-5p	6_98899268_98934879	circRNA	ENSG00000112234	FBXL4	F-box and leucine rich repeat protein 4 [Source:HGNC Symbol;Acc:HGNC:13601]	-0.61295	0.00889027	0.0845842	no
hsa-miR-423-5p	15_101699331_101714963	circRNA	ENSG00000185418	TARSL2	threonyl-tRNA synthetase like 2 [Source:HGNC Symbol;Acc:HGNC:24728]	-0.594468	0.0118455	0.0924212	no
hsa-miR-6855-5p	13_72731281_72743602	circRNA	ENSG00000136122	BORA	bora, aurora kinase A activator [Source:HGNC Symbol;Acc:HGNC:24724]	-0.610391	0.0092601	0.0857952	no
hsa-miR-6780a-5p	2_61522611_61537587	circRNA	ENSG00000082898	XPO1	exportin 1 [Source:HGNC Symbol;Acc:HGNC:12825]	-0.586665	0.0133057	0.0965006	no
hsa-miR-6749-3p	2_61522611_61537587	circRNA	ENSG00000082898	XPO1	exportin 1 [Source:HGNC Symbol;Acc:HGNC:12825]	-0.482538	0.0497868	0.157192	no
hsa-miR-1260a	2_171447687_171476950	circRNA	ENSG00000115827	DCAF17	DDB1 and CUL4 associated factor 17 [Source:HGNC Symbol;Acc:HGNC:25784]	-0.621007	0.00780247	0.0820705	no
hsa-miR-3180	15_92900786_92929091	circRNA	ENSG00000173575	CHD2	chromodomain helicase DNA binding protein 2 [Source:HGNC Symbol;Acc:HGNC:1917]	-0.655779	0.00425935	0.0689632	no
hsa-miR-6780a-5p	7_74689124_74691111	circRNA	ENSG00000263001	GTF2I	general transcription factor IIi [Source:HGNC Symbol;Acc:HGNC:4659]	-0.620061	0.00792429	0.0825871	no
hsa-miR-6780a-5p	15_92900786_92929091	circRNA	ENSG00000173575	CHD2	chromodomain helicase DNA binding protein 2 [Source:HGNC Symbol;Acc:HGNC:1917]	-0.51865	0.0329151	0.131418	no
hsa-miR-210-5p	22_42516011_42577098	circRNA				-0.58737	0.0131682	0.0959841	no
hsa-miR-363-5p	9_109050283_109060452	circRNA	ENSG00000106771	TMEM245	transmembrane protein 245 [Source:HGNC Symbol;Acc:HGNC:1363]	-0.638823	0.00577306	0.0756775	no
hsa-miR-363-5p	9_100006506_100022226	circRNA	ENSG00000023318	ERP44	endoplasmic reticulum protein 44 [Source:HGNC Symbol;Acc:HGNC:18311]	-0.482538	0.0497868	0.157192	no
hsa-miR-6780a-5p	1_61111371_61163075	circRNA	ENSG00000162599	NFIA	nuclear factor I A [Source:HGNC Symbol;Acc:HGNC:7784]	-0.540985	0.0249324	0.120443	no
hsa-miR-6803-3p	10_96544076_96576829	circRNA	ENSG00000077147	TM9SF3	transmembrane 9 superfamily member 3 [Source:HGNC Symbol;Acc:HGNC:21529]	-0.512255	0.0355265	0.135126	no
hsa-miR-125a-3p	10_87864454_87933251	circRNA	ENSG00000171862	PTEN	phosphatase and tensin homolog [Source:HGNC Symbol;Acc:HGNC:9588]	-0.566998	0.0176214	0.106699	no
hsa-miR-6511a-3p	2_144208603_144237339	circRNA	ENSG00000121964	GTDC1	glycosyltransferase like domain containing 1 [Source:HGNC Symbol;Acc:HGNC:20887]	-0.511184	0.0359788	0.136079	no
hsa-miR-3180-3p	7_129857511_129951320	circRNA	ENSG00000186591	UBE2H	ubiquitin conjugating enzyme E2 H [Source:HGNC Symbol;Acc:HGNC:12484]	-0.678534	0.00274942	0.0598154	no
hsa-miR-1292-5p	13_113585774_113640375	circRNA	ENSG00000198176	TFDP1	transcription factor Dp-1 [Source:HGNC Symbol;Acc:HGNC:11749]	-0.567929	0.017395	0.106256	no
hsa-miR-197-3p	17_43057052_43074521	circRNA	ENSG00000012048	BRCA1	BRCA1, DNA repair associated [Source:HGNC Symbol;Acc:HGNC:1100]	-0.559238	0.0195984	0.110762	no
hsa-miR-423-5p	13_72731281_72743602	circRNA	ENSG00000136122	BORA	bora, aurora kinase A activator [Source:HGNC Symbol;Acc:HGNC:24724]	-0.498928	0.0414733	0.144876	no
hsa-miR-423-5p	14_22370606_22382405	circRNA				-0.562845	0.0186589	0.10881	no
hsa-miR-92a-1-5p	15_65722848_65756472	circRNA	ENSG00000174485	DENND4A	DENN domain containing 4A [Source:HGNC Symbol;Acc:HGNC:24321]	-0.535628	0.0266933	0.121978	no
hsa-miR-6780a-5p	12_89459638_89525204	circRNA	ENSG00000139323	POC1B	POC1 centriolar protein B [Source:HGNC Symbol;Acc:HGNC:30836]	-0.64436	0.00523746	0.0732728	no
hsa-miR-6511b-3p	10_68459104_68465812	circRNA	ENSG00000138346	DNA2	DNA replication helicase/nuclease 2 [Source:HGNC Symbol;Acc:HGNC:2939]	-0.507323	0.0376461	0.138296	no
hsa-miR-1343-3p	13_113585774_113640375	circRNA	ENSG00000198176	TFDP1	transcription factor Dp-1 [Source:HGNC Symbol;Acc:HGNC:11749]	-0.517505	0.0333715	0.132087	no
hsa-miR-6825-5p	14_102376650_102414793	circRNA	ENSG00000196663	TECPR2	tectonin beta-propeller repeat containing 2 [Source:HGNC Symbol;Acc:HGNC:19957]	-0.513218	0.0351233	0.134616	no
hsa-miR-1260a	1_233177802_233236980	circRNA	ENSG00000135749	PCNX2	pecanex 2 [Source:HGNC Symbol;Acc:HGNC:8736]	-0.543325	0.0241919	0.118559	no
hsa-miR-6780a-5p	2_112074912_112089718	circRNA	ENSG00000153214	TMEM87B	transmembrane protein 87B [Source:HGNC Symbol;Acc:HGNC:25913]	-0.503687	0.0392692	0.141095	no
hsa-miR-328-3p	10_5959754_5966339	circRNA	ENSG00000134470	IL15RA	interleukin 15 receptor subunit alpha [Source:HGNC Symbol;Acc:HGNC:5978]	-0.617415	0.00827347	0.0832493	no
hsa-miR-6780a-5p	18_36026900_36040865	circRNA	ENSG00000141425	RPRD1A	regulation of nuclear pre-mRNA domain containing 1A [Source:HGNC Symbol;Acc:HGNC:25560]	-0.536295	0.0264692	0.121707	no
hsa-miR-6862-5p	11_16014942_16049938	circRNA	ENSG00000110693	SOX6	SRY-box 6 [Source:HGNC Symbol;Acc:HGNC:16421]	-0.614098	0.00872827	0.0845842	no
hsa-miR-197-3p	16_74942738_74956610	circRNA	ENSG00000103091	WDR59	WD repeat domain 59 [Source:HGNC Symbol;Acc:HGNC:25706]	-0.533429	0.0274436	0.123051	no
hsa-miR-1226-3p	13_113585774_113640375	circRNA	ENSG00000198176	TFDP1	transcription factor Dp-1 [Source:HGNC Symbol;Acc:HGNC:11749]	-0.586506	0.0133368	0.0965006	no
hsa-miR-6780a-5p	6_98899268_98934879	circRNA	ENSG00000112234	FBXL4	F-box and leucine rich repeat protein 4 [Source:HGNC Symbol;Acc:HGNC:13601]	-0.694843	0.00196277	0.0566907	no
hsa-miR-5010-5p	1_61111371_61163075	circRNA	ENSG00000162599	NFIA	nuclear factor I A [Source:HGNC Symbol;Acc:HGNC:7784]	-0.521132	0.0319424	0.129966	no
hsa-miR-1229-3p	6_90206569_90271941	circRNA	ENSG00000112182	BACH2	BTB domain and CNC homolog 2 [Source:HGNC Symbol;Acc:HGNC:14078]	-0.555488	0.0206138	0.112045	no
hsa-miR-204-5p	1_114463104_114477087	circRNA	ENSG00000197323	TRIM33	tripartite motif containing 33 [Source:HGNC Symbol;Acc:HGNC:16290]	-0.483432	0.0493038	0.1568	no
hsa-miR-210-5p	3_183057311_183071357	circRNA	ENSG00000078070	MCCC1	methylcrotonoyl-CoA carboxylase 1 [Source:HGNC Symbol;Acc:HGNC:6936]	-0.642406	0.00542165	0.0739968	no
hsa-miR-21-3p	11_16437677_16442317	circRNA	ENSG00000110693	SOX6	SRY-box 6 [Source:HGNC Symbol;Acc:HGNC:16421]	-0.65101	0.00464805	0.0707906	no
hsa-miR-6511a-3p	3_20099862_20152365	circRNA	ENSG00000114166	KAT2B	lysine acetyltransferase 2B [Source:HGNC Symbol;Acc:HGNC:8638]	-0.638157	0.00584026	0.0762591	no
hsa-miR-363-5p	8_140846260_140890769	circRNA	ENSG00000169398	PTK2	protein tyrosine kinase 2 [Source:HGNC Symbol;Acc:HGNC:9611]	-0.565297	0.0180405	0.107444	no
hsa-miR-6881-3p	13_113585774_113640375	circRNA	ENSG00000198176	TFDP1	transcription factor Dp-1 [Source:HGNC Symbol;Acc:HGNC:11749]	-0.520159	0.032321	0.130412	no
hsa-miR-6780a-5p	10_87864454_87933251	circRNA	ENSG00000171862	PTEN	phosphatase and tensin homolog [Source:HGNC Symbol;Acc:HGNC:9588]	-0.607903	0.00963127	0.0869723	no
hsa-miR-6747-3p	9_36056980_36065624	circRNA	ENSG00000122707	RECK	reversion inducing cysteine rich protein with kazal motifs [Source:HGNC Symbol;Acc:HGNC:11345]	-0.520159	0.032321	0.130412	no
hsa-miR-328-3p	10_26500819_26511906	circRNA	ENSG00000077420	APBB1IP	amyloid beta precursor protein binding family B member 1 interacting protein [Source:HGNC Symbol;Acc:HGNC:17379]	-0.702705	0.00165569	0.0532169	no
hsa-miR-1976	6_90206569_90271941	circRNA	ENSG00000112182	BACH2	BTB domain and CNC homolog 2 [Source:HGNC Symbol;Acc:HGNC:14078]	-0.602085	0.0105456	0.0903179	no
hsa-miR-92a-1-5p	14_103386041_103428440	circRNA	ENSG00000075413	MARK3	microtubule affinity regulating kinase 3 [Source:HGNC Symbol;Acc:HGNC:6897]	-0.574655	0.0158271	0.102049	no
hsa-miR-766-3p	8_140846260_140890769	circRNA	ENSG00000169398	PTK2	protein tyrosine kinase 2 [Source:HGNC Symbol;Acc:HGNC:9611]	-0.555488	0.0206138	0.112045	no
hsa-miR-766-3p	1_95134782_95152552	circRNA	ENSG00000271092,ENSG00000152078	TMEM56-RWDD3,TMEM56		-0.778925	0.000229107	0.0325331	no
hsa-miR-4685-3p	2_39006412_39010703	circRNA	ENSG00000115904	SOS1	SOS Ras/Rac guanine nucleotide exchange factor 1 [Source:HGNC Symbol;Acc:HGNC:11187]	-0.50123	0.0403958	0.143137	no
hsa-miR-92a-1-5p	7_129857511_129886747	circRNA	ENSG00000186591	UBE2H	ubiquitin conjugating enzyme E2 H [Source:HGNC Symbol;Acc:HGNC:12484]	-0.575125	0.015722	0.102049	no
hsa-miR-92b-3p	17_4296717_4331888	circRNA	ENSG00000132388	UBE2G1	ubiquitin conjugating enzyme E2 G1 [Source:HGNC Symbol;Acc:HGNC:12482]	-0.608243	0.00957989	0.0869723	no
hsa-miR-766-3p	9_36056980_36065624	circRNA	ENSG00000122707	RECK	reversion inducing cysteine rich protein with kazal motifs [Source:HGNC Symbol;Acc:HGNC:11345]	-0.559967	0.0194054	0.110269	no
hsa-miR-6734-5p	4_145081660_145096111	circRNA	ENSG00000164162	ANAPC10	anaphase promoting complex subunit 10 [Source:HGNC Symbol;Acc:HGNC:24077]	-0.655137	0.00431005	0.0689632	no
hsa-miR-6855-5p	2_24522329_24556055	circRNA	ENSG00000084676	NCOA1	nuclear receptor coactivator 1 [Source:HGNC Symbol;Acc:HGNC:7668]	-0.489816	0.045954	0.151541	no
hsa-miR-5010-5p	22_42516011_42577098	circRNA				-0.484366	0.0488027	0.155642	no
hsa-miR-6855-5p	16_71977236_71982235	circRNA	ENSG00000277481	PKD1L3	polycystin 1 like 3, transient receptor potential channel interacting [Source:HGNC Symbol;Acc:HGNC:21716]	-0.609859	0.00933852	0.0858297	no
hsa-miR-4685-3p	1_65272073_65366196	circRNA	ENSG00000116675	DNAJC6	DnaJ heat shock protein family (Hsp40) member C6 [Source:HGNC Symbol;Acc:HGNC:15469]	-0.544697	0.0237658	0.117484	no
hsa-miR-6509-3p	17_68433468_68452992	circRNA	ENSG00000070540,ENSG00000141337	WIPI1,ARSG		-0.489528	0.046101	0.151623	no
hsa-miR-6511a-3p	3_170113360_170117476	circRNA	ENSG00000173889	PHC3	polyhomeotic homolog 3 [Source:HGNC Symbol;Acc:HGNC:15682]	-0.792667	0.00014782	0.0316266	no
hsa-miR-363-5p	7_142463288_142482603	circRNA				-0.675554	0.00291771	0.0600457	no
hsa-miR-204-5p	6_98899268_98934879	circRNA	ENSG00000112234	FBXL4	F-box and leucine rich repeat protein 4 [Source:HGNC Symbol;Acc:HGNC:13601]	-0.68593	0.0023658	0.05773	no
hsa-miR-6894-3p	3_20099862_20152365	circRNA	ENSG00000114166	KAT2B	lysine acetyltransferase 2B [Source:HGNC Symbol;Acc:HGNC:8638]	-0.538833	0.0256285	0.120987	no
hsa-miR-1976	17_43057052_43074521	circRNA	ENSG00000012048	BRCA1	BRCA1, DNA repair associated [Source:HGNC Symbol;Acc:HGNC:1100]	-0.579313	0.0148082	0.100251	no
hsa-miR-3619-3p	15_92900786_92929091	circRNA	ENSG00000173575	CHD2	chromodomain helicase DNA binding protein 2 [Source:HGNC Symbol;Acc:HGNC:1917]	-0.563319	0.0185381	0.108718	no
hsa-miR-574-3p	13_113585774_113640375	circRNA	ENSG00000198176	TFDP1	transcription factor Dp-1 [Source:HGNC Symbol;Acc:HGNC:11749]	-0.528121	0.0293212	0.127166	no
hsa-miR-6825-5p	6_107904629_107924932	circRNA	ENSG00000025796	SEC63	SEC63 homolog, protein translocation regulator [Source:HGNC Symbol;Acc:HGNC:21082]	-0.635412	0.00612426	0.0775555	no
hsa-miR-6734-5p	13_113585774_113640375	circRNA	ENSG00000198176	TFDP1	transcription factor Dp-1 [Source:HGNC Symbol;Acc:HGNC:11749]	-0.599776	0.0109271	0.0903179	no
hsa-miR-5010-3p	7_129857511_129951320	circRNA	ENSG00000186591	UBE2H	ubiquitin conjugating enzyme E2 H [Source:HGNC Symbol;Acc:HGNC:12484]	-0.571208	0.0166161	0.104361	no
hsa-miR-664b-3p	6_90206569_90271941	circRNA	ENSG00000112182	BACH2	BTB domain and CNC homolog 2 [Source:HGNC Symbol;Acc:HGNC:14078]	-0.500307	0.0408255	0.144164	no
hsa-miR-194-3p	17_4296717_4331888	circRNA	ENSG00000132388	UBE2G1	ubiquitin conjugating enzyme E2 G1 [Source:HGNC Symbol;Acc:HGNC:12482]	-0.653861	0.00441237	0.0700063	no
hsa-miR-6802-3p	1_37864312_37868614	circRNA	ENSG00000204084	INPP5B	inositol polyphosphate-5-phosphatase B [Source:HGNC Symbol;Acc:HGNC:6077]	-0.50607	0.0381994	0.139404	no
hsa-miR-1229-3p	10_101800242_101807901	circRNA	ENSG00000198408	OGA	O-GlcNAcase [Source:HGNC Symbol;Acc:HGNC:7056]	-0.518628	0.0329239	0.131418	no
hsa-miR-6862-5p	1_117911994_117918736	circRNA	ENSG00000196505	GDAP2	ganglioside induced differentiation associated protein 2 [Source:HGNC Symbol;Acc:HGNC:18010]	-0.5772	0.0152638	0.101165	no
hsa-miR-6747-3p	7_129857511_129951320	circRNA	ENSG00000186591	UBE2H	ubiquitin conjugating enzyme E2 H [Source:HGNC Symbol;Acc:HGNC:12484]	-0.547408	0.022941	0.116552	no
hsa-miR-6894-3p	5_171964198_171997051	circRNA	ENSG00000072803	FBXW11	F-box and WD repeat domain containing 11 [Source:HGNC Symbol;Acc:HGNC:13607]	-0.520319	0.0322585	0.130412	no
hsa-miR-23a-5p	12_47100517_47108164	circRNA	ENSG00000139211	AMIGO2	adhesion molecule with Ig like domain 2 [Source:HGNC Symbol;Acc:HGNC:24073]	-0.516353	0.0338356	0.132087	no
hsa-miR-1229-3p	17_63760914_63766194	circRNA	ENSG00000108588	CCDC47	coiled-coil domain containing 47 [Source:HGNC Symbol;Acc:HGNC:24856]	-0.484366	0.0488027	0.155642	no
hsa-miR-1976	17_4296717_4331888	circRNA	ENSG00000132388	UBE2G1	ubiquitin conjugating enzyme E2 G1 [Source:HGNC Symbol;Acc:HGNC:12482]	-0.714685	0.00126441	0.0463446	no
hsa-miR-486-3p	10_26500819_26511906	circRNA	ENSG00000077420	APBB1IP	amyloid beta precursor protein binding family B member 1 interacting protein [Source:HGNC Symbol;Acc:HGNC:17379]	-0.700248	0.00174708	0.0539317	no
hsa-miR-6825-5p	8_19704761_19715024	circRNA	ENSG00000147408	CSGALNACT1	chondroitin sulfate N-acetylgalactosaminyltransferase 1 [Source:HGNC Symbol;Acc:HGNC:24290]	-0.521922	0.0316376	0.129966	no
hsa-miR-3605-3p	12_801904_813814	circRNA	ENSG00000060237	WNK1	WNK lysine deficient protein kinase 1 [Source:HGNC Symbol;Acc:HGNC:14540]	-0.593098	0.0120922	0.0934061	no
hsa-miR-6511b-3p	4_145081660_145096111	circRNA	ENSG00000164162	ANAPC10	anaphase promoting complex subunit 10 [Source:HGNC Symbol;Acc:HGNC:24077]	-0.585653	0.013505	0.0967742	no
hsa-miR-6802-3p	15_65722848_65756472	circRNA	ENSG00000174485	DENND4A	DENN domain containing 4A [Source:HGNC Symbol;Acc:HGNC:24321]	-0.551471	0.0217466	0.114265	no
hsa-miR-3180-3p	7_156734177_156826744	circRNA	ENSG00000105983	LMBR1	limb development membrane protein 1 [Source:HGNC Symbol;Acc:HGNC:13243]	-0.550221	0.0221086	0.114578	no
hsa-miR-1229-3p	X_51327721_51357027	circRNA				-0.5258	0.0301725	0.127896	no
hsa-miR-423-5p	20_62854016_62860308	circRNA	ENSG00000101190	TCFL5	transcription factor like 5 [Source:HGNC Symbol;Acc:HGNC:11646]	-0.822701	5.01837e-05	0.0313655	no
hsa-miR-363-5p	3_47169169_47175828	circRNA				-0.485659	0.048115	0.154229	no
hsa-miR-3180-3p	14_52439204_52457174	circRNA	ENSG00000087301	TXNDC16	thioredoxin domain containing 16 [Source:HGNC Symbol;Acc:HGNC:19965]	-0.504986	0.0386833	0.140176	no
hsa-miR-363-5p	13_79365578_79378907	circRNA	ENSG00000139746	RBM26	RNA binding motif protein 26 [Source:HGNC Symbol;Acc:HGNC:20327]	-0.512383	0.0354728	0.135126	no
hsa-miR-6855-5p	5_50402286_50411383	circRNA	ENSG00000170571	EMB	embigin [Source:HGNC Symbol;Acc:HGNC:30465]	-0.765175	0.00034493	0.0337794	no
hsa-miR-629-3p	14_103386041_103428440	circRNA	ENSG00000075413	MARK3	microtubule affinity regulating kinase 3 [Source:HGNC Symbol;Acc:HGNC:6897]	-0.741993	0.000649161	0.0406411	no
hsa-miR-210-5p	4_88938088_88991150	circRNA	ENSG00000138640	FAM13A	family with sequence similarity 13 member A [Source:HGNC Symbol;Acc:HGNC:19367]	-0.598406	0.0111585	0.0906626	no
hsa-miR-4732-3p	X_51327721_51357027	circRNA				-0.488945	0.0464005	0.151905	no
hsa-miR-4685-3p	6_110626776_110632161	circRNA	ENSG00000155111	CDK19	cyclin dependent kinase 19 [Source:HGNC Symbol;Acc:HGNC:19338]	-0.578208	0.015045	0.100654	no
hsa-miR-6511a-3p	3_182947238_182964049	circRNA	ENSG00000043093	DCUN1D1	defective in cullin neddylation 1 domain containing 1 [Source:HGNC Symbol;Acc:HGNC:18184]	-0.669939	0.00325753	0.0644697	no
hsa-miR-4732-5p	14_22370606_22382405	circRNA				-0.554261	0.0209546	0.11264	no
hsa-miR-3180-3p	7_23694891_23702196	circRNA	ENSG00000188732	FAM221A	family with sequence similarity 221 member A [Source:HGNC Symbol;Acc:HGNC:27977]	-0.599132	0.0110353	0.0903179	no
hsa-miR-6780a-5p	10_68355353_68364113	circRNA	ENSG00000204130	RUFY2	RUN and FYVE domain containing 2 [Source:HGNC Symbol;Acc:HGNC:19761]	-0.632803	0.00640443	0.0783479	no
hsa-miR-6727-3p	5_55649207_55672695	circRNA	ENSG00000177058	SLC38A9	solute carrier family 38 member 9 [Source:HGNC Symbol;Acc:HGNC:26907]	-0.514872	0.0344396	0.132944	no
hsa-miR-363-5p	11_85996826_86068738	circRNA	ENSG00000073921	PICALM	phosphatidylinositol binding clathrin assembly protein [Source:HGNC Symbol;Acc:HGNC:15514]	-0.62107	0.00779433	0.0820705	no
hsa-miR-6894-3p	8_42459896_42472654	circRNA	ENSG00000168575	SLC20A2	solute carrier family 20 member 2 [Source:HGNC Symbol;Acc:HGNC:10947]	-0.694414	0.00198078	0.0566907	no
hsa-miR-6855-5p	8_100268785_100288267	circRNA	ENSG00000034677,ENSG00000104450	RNF19A,SPAG1		-0.62476	0.00733346	0.0813556	no
hsa-miR-204-5p	9_96551796_96565483	circRNA	ENSG00000081377	CDC14B	cell division cycle 14B [Source:HGNC Symbol;Acc:HGNC:1719]	-0.676667	0.00285387	0.0598154	no
hsa-miR-6782-3p	7_129857511_129951320	circRNA	ENSG00000186591	UBE2H	ubiquitin conjugating enzyme E2 H [Source:HGNC Symbol;Acc:HGNC:12484]	-0.492291	0.0447024	0.149976	no
hsa-miR-1229-3p	6_107744949_107772386	circRNA	ENSG00000146285	SCML4	Scm polycomb group protein like 4 [Source:HGNC Symbol;Acc:HGNC:21397]	-0.528121	0.0293212	0.127166	no
hsa-miR-92b-5p	7_142463288_142482603	circRNA				-0.485078	0.048423	0.155041	no
hsa-miR-6727-3p	5_109716160_109729513	circRNA	ENSG00000112893	MAN2A1	mannosidase alpha class 2A member 1 [Source:HGNC Symbol;Acc:HGNC:6824]	-0.618493	0.00812976	0.0832493	no
hsa-miR-486-3p	13_113585774_113640375	circRNA	ENSG00000198176	TFDP1	transcription factor Dp-1 [Source:HGNC Symbol;Acc:HGNC:11749]	-0.642238	0.00543781	0.0739968	no
hsa-miR-629-3p	20_41533050_41551360	circRNA	ENSG00000124177	CHD6	chromodomain helicase DNA binding protein 6 [Source:HGNC Symbol;Acc:HGNC:19057]	-0.552827	0.0213587	0.113381	no
hsa-miR-6780a-5p	X_123686548_123703505	circRNA	ENSG00000125676	THOC2	THO complex 2 [Source:HGNC Symbol;Acc:HGNC:19073]	-0.562621	0.0187161	0.10881	no
hsa-miR-3619-3p	15_65715478_65741784	circRNA	ENSG00000174485	DENND4A	DENN domain containing 4A [Source:HGNC Symbol;Acc:HGNC:24321]	-0.571427	0.0165651	0.104361	no
hsa-miR-6825-5p	14_52439204_52457174	circRNA	ENSG00000087301	TXNDC16	thioredoxin domain containing 16 [Source:HGNC Symbol;Acc:HGNC:19965]	-0.592743	0.0121568	0.0934728	no
hsa-miR-629-3p	1_176027572_176046324	circRNA	ENSG00000143207	COP1	COP1, E3 ubiquitin ligase [Source:HGNC Symbol;Acc:HGNC:17440]	-0.486488	0.047678	0.154036	no
hsa-miR-6855-5p	22_42516011_42577098	circRNA				-0.483139	0.0494615	0.156915	no
hsa-miR-6780a-5p	6_36894504_36916574	circRNA	ENSG00000198663	C6orf89	chromosome 6 open reading frame 89 [Source:HGNC Symbol;Acc:HGNC:21114]	-0.684644	0.00242913	0.05773	no
hsa-miR-6780a-5p	14_103386041_103428440	circRNA	ENSG00000075413	MARK3	microtubule affinity regulating kinase 3 [Source:HGNC Symbol;Acc:HGNC:6897]	-0.568282	0.0173098	0.106256	no
hsa-miR-5100	7_129857511_129951320	circRNA	ENSG00000186591	UBE2H	ubiquitin conjugating enzyme E2 H [Source:HGNC Symbol;Acc:HGNC:12484]	-0.635093	0.00615801	0.0775555	no
hsa-miR-363-5p	9_75077159_75080941	circRNA	ENSG00000106733	NMRK1	nicotinamide riboside kinase 1 [Source:HGNC Symbol;Acc:HGNC:26057]	-0.632803	0.00640443	0.0783479	no
hsa-miR-6734-5p	5_60748267_60767903	circRNA				-0.520048	0.0323647	0.130412	no
hsa-let-7b-3p	6_110626776_110632161	circRNA	ENSG00000155111	CDK19	cyclin dependent kinase 19 [Source:HGNC Symbol;Acc:HGNC:19338]	-0.500634	0.0406728	0.143952	no
hsa-miR-6855-5p	10_96544076_96576829	circRNA	ENSG00000077147	TM9SF3	transmembrane 9 superfamily member 3 [Source:HGNC Symbol;Acc:HGNC:21529]	-0.735294	0.000770053	0.0414409	no
hsa-miR-2110	7_142463288_142482603	circRNA				-0.497776	0.0420207	0.14607	no
hsa-miR-616-3p	7_156734177_156826744	circRNA	ENSG00000105983	LMBR1	limb development membrane protein 1 [Source:HGNC Symbol;Acc:HGNC:13243]	-0.586135	0.0134098	0.0965368	no
hsa-miR-6881-3p	3_20099862_20152365	circRNA	ENSG00000114166	KAT2B	lysine acetyltransferase 2B [Source:HGNC Symbol;Acc:HGNC:8638]	-0.607987	0.00961851	0.0869723	no
hsa-miR-6780a-5p	16_15611592_15623126	circRNA	ENSG00000166783	MARF1	meiosis regulator and mRNA stability factor 1 [Source:HGNC Symbol;Acc:HGNC:29562]	-0.582009	0.0142425	0.0984153	no
hsa-miR-6734-5p	4_78872614_78887284	circRNA	ENSG00000138756	BMP2K	BMP2 inducible kinase [Source:HGNC Symbol;Acc:HGNC:18041]	-0.567929	0.017395	0.106256	no
hsa-miR-3180-3p	7_148828740_148847305	circRNA	ENSG00000106462	EZH2	enhancer of zeste 2 polycomb repressive complex 2 subunit [Source:HGNC Symbol;Acc:HGNC:3527]	-0.655703	0.00426536	0.0689632	no
hsa-miR-6780a-5p	15_65729072_65761438	circRNA	ENSG00000174485	DENND4A	DENN domain containing 4A [Source:HGNC Symbol;Acc:HGNC:24321]	-0.563319	0.0185381	0.108718	no
hsa-miR-3180-3p	2_23798138_23834078	circRNA	ENSG00000119778	ATAD2B	ATPase family, AAA domain containing 2B [Source:HGNC Symbol;Acc:HGNC:29230]	-0.672922	0.00307319	0.0621199	no
hsa-miR-204-5p	12_122534664_122543634	circRNA	ENSG00000184445	KNTC1	kinetochore associated 1 [Source:HGNC Symbol;Acc:HGNC:17255]	-0.534714	0.0270031	0.122997	no
hsa-miR-6802-3p	5_171964198_171997051	circRNA	ENSG00000072803	FBXW11	F-box and WD repeat domain containing 11 [Source:HGNC Symbol;Acc:HGNC:13607]	-0.559789	0.0194524	0.110269	no
hsa-miR-6511b-3p	3_20099862_20152365	circRNA	ENSG00000114166	KAT2B	lysine acetyltransferase 2B [Source:HGNC Symbol;Acc:HGNC:8638]	-0.583171	0.0140038	0.097717	no
hsa-miR-6747-3p	12_122534664_122539754	circRNA	ENSG00000184445	KNTC1	kinetochore associated 1 [Source:HGNC Symbol;Acc:HGNC:17255]	-0.602322	0.010507	0.0903179	no
hsa-miR-6780a-5p	5_55645789_55664863	circRNA	ENSG00000177058	SLC38A9	solute carrier family 38 member 9 [Source:HGNC Symbol;Acc:HGNC:26907]	-0.508724	0.0370344	0.138027	no
hsa-miR-1226-3p	6_107744949_107772386	circRNA	ENSG00000146285	SCML4	Scm polycomb group protein like 4 [Source:HGNC Symbol;Acc:HGNC:21397]	-0.538736	0.0256602	0.120987	no
hsa-miR-6881-3p	10_5768213_5800705	circRNA	ENSG00000057608	GDI2	GDP dissociation inhibitor 2 [Source:HGNC Symbol;Acc:HGNC:4227]	-0.527365	0.0295963	0.127578	no
hsa-let-7d-3p	6_110626776_110632161	circRNA	ENSG00000155111	CDK19	cyclin dependent kinase 19 [Source:HGNC Symbol;Acc:HGNC:19338]	-0.632803	0.00640443	0.0783479	no
hsa-miR-6894-3p	2_174915058_174952202	circRNA	ENSG00000128656	CHN1	chimerin 1 [Source:HGNC Symbol;Acc:HGNC:1943]	-0.565127	0.018083	0.10746	no
hsa-miR-363-5p	16_11883015_11887750	circRNA	ENSG00000103342	GSPT1	G1 to S phase transition 1 [Source:HGNC Symbol;Acc:HGNC:4621]	-0.549913	0.0221986	0.114939	no
hsa-miR-6780a-5p	15_101701086_101714963	circRNA	ENSG00000185418	TARSL2	threonyl-tRNA synthetase like 2 [Source:HGNC Symbol;Acc:HGNC:24728]	-0.761662	0.000381298	0.0355045	no
hsa-miR-616-3p	3_148582857_148592262	circRNA				-0.519087	0.0327422	0.131253	no
hsa-miR-6855-5p	8_100274953_100288267	circRNA	ENSG00000034677,ENSG00000104450	RNF19A,SPAG1		-0.807617	8.83536e-05	0.0313655	no
hsa-miR-6825-5p	8_42459896_42472654	circRNA	ENSG00000168575	SLC20A2	solute carrier family 20 member 2 [Source:HGNC Symbol;Acc:HGNC:10947]	-0.599203	0.0110234	0.0903179	no
hsa-miR-3180	7_156734177_156826744	circRNA	ENSG00000105983	LMBR1	limb development membrane protein 1 [Source:HGNC Symbol;Acc:HGNC:13243]	-0.550221	0.0221086	0.114578	no
hsa-miR-6882-3p	12_122534664_122543634	circRNA	ENSG00000184445	KNTC1	kinetochore associated 1 [Source:HGNC Symbol;Acc:HGNC:17255]	-0.494984	0.0433702	0.147776	no
hsa-miR-6855-5p	17_43057052_43074521	circRNA	ENSG00000012048	BRCA1	BRCA1, DNA repair associated [Source:HGNC Symbol;Acc:HGNC:1100]	-0.524823	0.0305366	0.128671	no
hsa-miR-6862-5p	6_17665239_17675770	circRNA	ENSG00000124789	NUP153	nucleoporin 153 [Source:HGNC Symbol;Acc:HGNC:8062]	-0.584016	0.0138324	0.097717	no
hsa-miR-6780a-5p	5_178608376_178612890	circRNA	ENSG00000113240	CLK4	CDC like kinase 4 [Source:HGNC Symbol;Acc:HGNC:13659]	-0.59652	0.0114834	0.0909704	no
hsa-miR-766-3p	4_42551198_42556040	circRNA	ENSG00000124406	ATP8A1	ATPase phospholipid transporting 8A1 [Source:HGNC Symbol;Acc:HGNC:13531]	-0.593501	0.0120192	0.0934061	no
hsa-miR-423-5p	1_233177802_233236980	circRNA	ENSG00000135749	PCNX2	pecanex 2 [Source:HGNC Symbol;Acc:HGNC:8736]	-0.49942	0.0412414	0.144876	no
hsa-miR-194-3p	14_31364189_31387375	circRNA	ENSG00000129493	HEATR5A	HEAT repeat containing 5A [Source:HGNC Symbol;Acc:HGNC:20276]	-0.781592	0.000210937	0.0325331	no
hsa-miR-6747-3p	14_31364189_31387375	circRNA	ENSG00000129493	HEATR5A	HEAT repeat containing 5A [Source:HGNC Symbol;Acc:HGNC:20276]	-0.577831	0.0151267	0.100662	no
hsa-miR-25-5p	15_101701086_101714963	circRNA	ENSG00000185418	TARSL2	threonyl-tRNA synthetase like 2 [Source:HGNC Symbol;Acc:HGNC:24728]	-0.644891	0.00518827	0.073125	no
hsa-miR-1260a	10_87864454_87933251	circRNA	ENSG00000171862	PTEN	phosphatase and tensin homolog [Source:HGNC Symbol;Acc:HGNC:9588]	-0.488295	0.0467357	0.152718	no
hsa-miR-4732-5p	9_123440360_123454779	circRNA	ENSG00000119522,ENSG00000148204	DENND1A,CRB2		-0.642238	0.00543781	0.0739968	no
hsa-miR-1260a	2_68217092_68234659	circRNA	ENSG00000221823	PPP3R1	protein phosphatase 3 regulatory subunit B, alpha [Source:HGNC Symbol;Acc:HGNC:9317]	-0.519849	0.0324424	0.130412	no
hsa-miR-6749-3p	20_62854016_62860308	circRNA	ENSG00000101190	TCFL5	transcription factor like 5 [Source:HGNC Symbol;Acc:HGNC:11646]	-0.650199	0.0047169	0.0707906	no
hsa-miR-6825-5p	15_75407055_75422823	circRNA	ENSG00000169375,ENSG00000140398	SIN3A,NEIL1		-0.577834	0.0151258	0.100662	no
hsa-miR-92b-3p	15_65715478_65741784	circRNA	ENSG00000174485	DENND4A	DENN domain containing 4A [Source:HGNC Symbol;Acc:HGNC:24321]	-0.553649	0.0211264	0.11306	no
hsa-miR-6799-3p	12_89459638_89525204	circRNA	ENSG00000139323	POC1B	POC1 centriolar protein B [Source:HGNC Symbol;Acc:HGNC:30836]	-0.573196	0.0161574	0.102886	no
hsa-miR-6780a-5p	12_102257215_102315490	circRNA				-0.499012	0.0414337	0.144876	no
hsa-miR-6727-3p	11_78103980_78121174	circRNA	ENSG00000159063	ALG8	ALG8, alpha-1,3-glucosyltransferase [Source:HGNC Symbol;Acc:HGNC:23161]	-0.496601	0.0425849	0.146862	no
hsa-miR-6825-5p	2_196154968_196163427	circRNA	ENSG00000081320	STK17B	serine/threonine kinase 17b [Source:HGNC Symbol;Acc:HGNC:11396]	-0.713568	0.00129732	0.0463446	no
hsa-miR-6802-3p	3_196062582_196068130	circRNA	ENSG00000072274	TFRC	transferrin receptor [Source:HGNC Symbol;Acc:HGNC:11763]	-0.653088	0.00447533	0.0703282	no
hsa-miR-92a-1-5p	7_156734177_156826744	circRNA	ENSG00000105983	LMBR1	limb development membrane protein 1 [Source:HGNC Symbol;Acc:HGNC:13243]	-0.728958	0.000901001	0.0436841	no
hsa-miR-6509-3p	9_128471308_128473741	circRNA	ENSG00000136811	ODF2	outer dense fiber of sperm tails 2 [Source:HGNC Symbol;Acc:HGNC:8114]	-0.773134	0.00027311	0.0335771	no
hsa-miR-6511b-3p	5_55645789_55664863	circRNA	ENSG00000177058	SLC38A9	solute carrier family 38 member 9 [Source:HGNC Symbol;Acc:HGNC:26907]	-0.498798	0.0415351	0.144914	no
hsa-miR-194-3p	7_139371387_139398697	circRNA	ENSG00000146963	LUC7L2	LUC7 like 2, pre-mRNA splicing factor [Source:HGNC Symbol;Acc:HGNC:21608]	-0.716188	0.00122122	0.0462436	no
hsa-miR-6727-3p	15_75407055_75422823	circRNA	ENSG00000169375,ENSG00000140398	SIN3A,NEIL1		-0.526194	0.0300268	0.127718	no
hsa-miR-6511a-3p	15_65722848_65756472	circRNA	ENSG00000174485	DENND4A	DENN domain containing 4A [Source:HGNC Symbol;Acc:HGNC:24321]	-0.52851	0.0291802	0.127166	no
hsa-miR-3127-5p	7_92457552_92492286	circRNA				-0.524054	0.0308254	0.129512	no
hsa-miR-6825-5p	15_101701086_101714963	circRNA	ENSG00000185418	TARSL2	threonyl-tRNA synthetase like 2 [Source:HGNC Symbol;Acc:HGNC:24728]	-0.693248	0.00203042	0.0566907	no
hsa-miR-1229-3p	11_16014942_16049938	circRNA	ENSG00000110693	SOX6	SRY-box 6 [Source:HGNC Symbol;Acc:HGNC:16421]	-0.643217	0.00534463	0.0739968	no
hsa-miR-1976	1_25321889_25356853	circRNA				-0.482955	0.0495608	0.156915	no
hsa-miR-18b-3p	6_90206569_90271941	circRNA	ENSG00000112182	BACH2	BTB domain and CNC homolog 2 [Source:HGNC Symbol;Acc:HGNC:14078]	-0.58737	0.0131682	0.0959841	no
hsa-miR-6825-5p	13_73943981_73995053	circRNA				-0.597383	0.0113338	0.0909578	no
hsa-miR-3180-3p	4_88938088_88991150	circRNA	ENSG00000138640	FAM13A	family with sequence similarity 13 member A [Source:HGNC Symbol;Acc:HGNC:19367]	-0.522693	0.0313419	0.129958	no
hsa-miR-6509-3p	2_148329960_148342336	circRNA	ENSG00000204406	MBD5	methyl-CpG binding domain protein 5 [Source:HGNC Symbol;Acc:HGNC:20444]	-0.640739	0.00558291	0.074614	no
hsa-miR-6780a-5p	12_122534664_122543634	circRNA	ENSG00000184445	KNTC1	kinetochore associated 1 [Source:HGNC Symbol;Acc:HGNC:17255]	-0.578545	0.0149726	0.100418	no
hsa-miR-6727-3p	11_85996826_86068738	circRNA	ENSG00000073921	PICALM	phosphatidylinositol binding clathrin assembly protein [Source:HGNC Symbol;Acc:HGNC:15514]	-0.589205	0.0128155	0.0949058	no
hsa-miR-363-5p	2_23875829_23880755	circRNA	ENSG00000119778	ATAD2B	ATPase family, AAA domain containing 2B [Source:HGNC Symbol;Acc:HGNC:29230]	-0.509795	0.036572	0.136934	no
hsa-miR-6882-3p	1_233177802_233236980	circRNA	ENSG00000135749	PCNX2	pecanex 2 [Source:HGNC Symbol;Acc:HGNC:8736]	-0.486216	0.0478213	0.154229	no
hsa-miR-1343-3p	6_90206569_90271941	circRNA	ENSG00000112182	BACH2	BTB domain and CNC homolog 2 [Source:HGNC Symbol;Acc:HGNC:14078]	-0.49908	0.0414014	0.144876	no
hsa-miR-486-3p	10_5959754_5966339	circRNA	ENSG00000134470	IL15RA	interleukin 15 receptor subunit alpha [Source:HGNC Symbol;Acc:HGNC:5978]	-0.692876	0.00204644	0.0566907	no
hsa-miR-328-3p	8_42459896_42472654	circRNA	ENSG00000168575	SLC20A2	solute carrier family 20 member 2 [Source:HGNC Symbol;Acc:HGNC:10947]	-0.583852	0.0138655	0.097717	no
hsa-miR-4685-3p	6_90206569_90271941	circRNA	ENSG00000112182	BACH2	BTB domain and CNC homolog 2 [Source:HGNC Symbol;Acc:HGNC:14078]	-0.553035	0.0212998	0.113381	no
hsa-miR-6881-3p	10_96544076_96576829	circRNA	ENSG00000077147	TM9SF3	transmembrane 9 superfamily member 3 [Source:HGNC Symbol;Acc:HGNC:21529]	-0.651961	0.00456835	0.0707488	no
hsa-miR-1226-3p	17_63760914_63766194	circRNA	ENSG00000108588	CCDC47	coiled-coil domain containing 47 [Source:HGNC Symbol;Acc:HGNC:24856]	-0.516248	0.0338783	0.132117	no
hsa-miR-363-5p	5_55649207_55672695	circRNA	ENSG00000177058	SLC38A9	solute carrier family 38 member 9 [Source:HGNC Symbol;Acc:HGNC:26907]	-0.54625	0.0232906	0.116788	no
hsa-miR-194-3p	10_96544076_96576829	circRNA	ENSG00000077147	TM9SF3	transmembrane 9 superfamily member 3 [Source:HGNC Symbol;Acc:HGNC:21529]	-0.745098	0.000598715	0.0395431	no
hsa-miR-6747-3p	5_171964198_171997051	circRNA	ENSG00000072803	FBXW11	F-box and WD repeat domain containing 11 [Source:HGNC Symbol;Acc:HGNC:13607]	-0.49942	0.0412414	0.144876	no
hsa-miR-4732-5p	4_145081660_145096111	circRNA	ENSG00000164162	ANAPC10	anaphase promoting complex subunit 10 [Source:HGNC Symbol;Acc:HGNC:24077]	-0.573245	0.0161462	0.102886	no
hsa-miR-6855-5p	6_90206569_90271941	circRNA	ENSG00000112182	BACH2	BTB domain and CNC homolog 2 [Source:HGNC Symbol;Acc:HGNC:14078]	-0.724709	0.000998747	0.0436841	no
hsa-miR-6747-3p	10_5959754_5966339	circRNA	ENSG00000134470	IL15RA	interleukin 15 receptor subunit alpha [Source:HGNC Symbol;Acc:HGNC:5978]	-0.621531	0.00773556	0.0820705	no
hsa-miR-6882-3p	10_5959754_5966339	circRNA	ENSG00000134470	IL15RA	interleukin 15 receptor subunit alpha [Source:HGNC Symbol;Acc:HGNC:5978]	-0.570095	0.0168774	0.104655	no
hsa-miR-6780a-5p	14_90961900_90978524	circRNA	ENSG00000100784	RPS6KA5	ribosomal protein S6 kinase A5 [Source:HGNC Symbol;Acc:HGNC:10434]	-0.676738	0.00284987	0.0598154	no
hsa-miR-363-5p	6_107904629_107924932	circRNA	ENSG00000025796	SEC63	SEC63 homolog, protein translocation regulator [Source:HGNC Symbol;Acc:HGNC:21082]	-0.554924	0.0207701	0.112527	no
hsa-miR-3180-3p	14_103386041_103428440	circRNA	ENSG00000075413	MARK3	microtubule affinity regulating kinase 3 [Source:HGNC Symbol;Acc:HGNC:6897]	-0.711055	0.00137391	0.0475843	no
hsa-miR-363-5p	15_101701086_101714963	circRNA	ENSG00000185418	TARSL2	threonyl-tRNA synthetase like 2 [Source:HGNC Symbol;Acc:HGNC:24728]	-0.55466	0.0208434	0.112539	no
hsa-miR-1976	1_95134782_95152552	circRNA	ENSG00000271092,ENSG00000152078	TMEM56-RWDD3,TMEM56		-0.771162	0.00028962	0.0335771	no
hsa-miR-224-5p	2_217814912_217836211	circRNA	ENSG00000079308	TNS1	tensin 1 [Source:HGNC Symbol;Acc:HGNC:11973]	-0.489786	0.0459693	0.151541	no
hsa-miR-5100	3_136472413_136502779	circRNA	ENSG00000118007	STAG1	stromal antigen 1 [Source:HGNC Symbol;Acc:HGNC:11354]	-0.553392	0.0211987	0.11306	no
hsa-miR-1260a	10_73467553_73479517	circRNA	ENSG00000107758	PPP3CB	protein phosphatase 3 catalytic subunit beta [Source:HGNC Symbol;Acc:HGNC:9315]	-0.597514	0.0113113	0.0909578	no
hsa-miR-4685-3p	11_85996826_86068738	circRNA	ENSG00000073921	PICALM	phosphatidylinositol binding clathrin assembly protein [Source:HGNC Symbol;Acc:HGNC:15514]	-0.793158	0.000145437	0.0316266	no
hsa-miR-1976	3_20099862_20152365	circRNA	ENSG00000114166	KAT2B	lysine acetyltransferase 2B [Source:HGNC Symbol;Acc:HGNC:8638]	-0.593098	0.0120922	0.0934061	no
hsa-miR-6882-3p	X_51327721_51357027	circRNA				-0.585562	0.013523	0.0967742	no
hsa-miR-194-3p	10_5959754_5966339	circRNA	ENSG00000134470	IL15RA	interleukin 15 receptor subunit alpha [Source:HGNC Symbol;Acc:HGNC:5978]	-0.720317	0.00110881	0.0456379	no
hsa-miR-3127-5p	3_196069455_196077122	circRNA	ENSG00000072274	TFRC	transferrin receptor [Source:HGNC Symbol;Acc:HGNC:11763]	-0.617647	0.00824233	0.0832493	no
hsa-miR-6509-3p	15_67226901_67236820	circRNA	ENSG00000103591	AAGAB	alpha and gamma adaptin binding protein [Source:HGNC Symbol;Acc:HGNC:25662]	-0.59652	0.0114834	0.0909704	no
hsa-miR-4732-5p	2_112074912_112089718	circRNA	ENSG00000153214	TMEM87B	transmembrane protein 87B [Source:HGNC Symbol;Acc:HGNC:25913]	-0.538085	0.0258741	0.121158	no
hsa-miR-6881-3p	5_55649207_55672695	circRNA	ENSG00000177058	SLC38A9	solute carrier family 38 member 9 [Source:HGNC Symbol;Acc:HGNC:26907]	-0.516656	0.0337132	0.132087	no
hsa-miR-6511b-3p	14_90943078_91001159	circRNA	ENSG00000100784	RPS6KA5	ribosomal protein S6 kinase A5 [Source:HGNC Symbol;Acc:HGNC:10434]	-0.534379	0.0271174	0.123051	no
hsa-miR-6509-3p	10_87864454_87933251	circRNA	ENSG00000171862	PTEN	phosphatase and tensin homolog [Source:HGNC Symbol;Acc:HGNC:9588]	-0.600505	0.0108055	0.0903179	no
hsa-miR-486-3p	5_171964198_171997051	circRNA	ENSG00000072803	FBXW11	F-box and WD repeat domain containing 11 [Source:HGNC Symbol;Acc:HGNC:13607]	-0.633879	0.00628768	0.0779102	no
hsa-miR-197-3p	15_65715478_65741784	circRNA	ENSG00000174485	DENND4A	DENN domain containing 4A [Source:HGNC Symbol;Acc:HGNC:24321]	-0.523173	0.031159	0.129753	no
hsa-miR-3180	20_62854016_62860308	circRNA	ENSG00000101190	TCFL5	transcription factor like 5 [Source:HGNC Symbol;Acc:HGNC:11646]	-0.814163	6.95473e-05	0.0313655	no
hsa-miR-636	14_103386041_103428440	circRNA	ENSG00000075413	MARK3	microtubule affinity regulating kinase 3 [Source:HGNC Symbol;Acc:HGNC:6897]	-0.506242	0.038123	0.139343	no
hsa-miR-204-5p	7_80661063_80666489	circRNA	ENSG00000135218	CD36	CD36 molecule [Source:HGNC Symbol;Acc:HGNC:1663]	-0.688442	0.0022459	0.0566907	no
hsa-miR-363-5p	7_74689124_74691111	circRNA	ENSG00000263001	GTF2I	general transcription factor IIi [Source:HGNC Symbol;Acc:HGNC:4659]	-0.541144	0.0248813	0.120443	no
hsa-miR-6780a-5p	10_73467553_73479517	circRNA	ENSG00000107758	PPP3CB	protein phosphatase 3 catalytic subunit beta [Source:HGNC Symbol;Acc:HGNC:9315]	-0.727789	0.000927072	0.0436841	no
hsa-miR-6855-5p	13_73943981_73995053	circRNA				-0.696116	0.00191009	0.0565068	no
hsa-miR-6780a-5p	3_20099862_20152365	circRNA	ENSG00000114166	KAT2B	lysine acetyltransferase 2B [Source:HGNC Symbol;Acc:HGNC:8638]	-0.555874	0.0205073	0.111981	no
hsa-miR-210-5p	10_26500819_26511906	circRNA	ENSG00000077420	APBB1IP	amyloid beta precursor protein binding family B member 1 interacting protein [Source:HGNC Symbol;Acc:HGNC:17379]	-0.651108	0.00463981	0.0707906	no
hsa-miR-6727-3p	17_43057052_43074521	circRNA	ENSG00000012048	BRCA1	BRCA1, DNA repair associated [Source:HGNC Symbol;Acc:HGNC:1100]	-0.53792	0.0259286	0.121271	no
hsa-miR-3180-3p	7_129857511_129886747	circRNA	ENSG00000186591	UBE2H	ubiquitin conjugating enzyme E2 H [Source:HGNC Symbol;Acc:HGNC:12484]	-0.489559	0.0460852	0.151623	no
hsa-miR-6882-3p	1_65272073_65366196	circRNA	ENSG00000116675	DNAJC6	DnaJ heat shock protein family (Hsp40) member C6 [Source:HGNC Symbol;Acc:HGNC:15469]	-0.501854	0.0401074	0.142916	no
hsa-miR-92b-3p	6_73479732_73480805	circRNA	ENSG00000135297	MTO1	mitochondrial tRNA translation optimization 1 [Source:HGNC Symbol;Acc:HGNC:19261]	-0.517505	0.0333715	0.132087	no
hsa-miR-210-5p	4_911673_913668	circRNA	ENSG00000127419,ENSG00000178950	TMEM175,GAK		-0.558417	0.0198171	0.111337	no
hsa-miR-3619-3p	10_68459104_68465812	circRNA	ENSG00000138346	DNA2	DNA replication helicase/nuclease 2 [Source:HGNC Symbol;Acc:HGNC:2939]	-0.517344	0.0334362	0.132087	no
hsa-miR-363-5p	12_89459638_89525204	circRNA	ENSG00000139323	POC1B	POC1 centriolar protein B [Source:HGNC Symbol;Acc:HGNC:30836]	-0.556375	0.0203698	0.111852	no
hsa-miR-2110	19_10163326_10179982	circRNA	ENSG00000130816	DNMT1	DNA methyltransferase 1 [Source:HGNC Symbol;Acc:HGNC:2976]	-0.629839	0.00673505	0.0792511	no
hsa-miR-6894-3p	14_31364189_31387375	circRNA	ENSG00000129493	HEATR5A	HEAT repeat containing 5A [Source:HGNC Symbol;Acc:HGNC:20276]	-0.605573	0.00998957	0.0882843	no
hsa-miR-6780a-5p	3_148582857_148592262	circRNA				-0.496144	0.0428056	0.146887	no
hsa-miR-6511a-3p	15_65715478_65741784	circRNA	ENSG00000174485	DENND4A	DENN domain containing 4A [Source:HGNC Symbol;Acc:HGNC:24321]	-0.675968	0.00289383	0.0600457	no
hsa-miR-6780a-5p	7_45747215_45751646	circRNA				-0.487541	0.0471275	0.153138	no
hsa-miR-6511b-3p	3_170113360_170117476	circRNA	ENSG00000173889	PHC3	polyhomeotic homolog 3 [Source:HGNC Symbol;Acc:HGNC:15682]	-0.780239	0.00022	0.0325331	no
hsa-miR-6780a-5p	11_85996826_86068738	circRNA	ENSG00000073921	PICALM	phosphatidylinositol binding clathrin assembly protein [Source:HGNC Symbol;Acc:HGNC:15514]	-0.575784	0.0155753	0.101536	no
hsa-miR-6780a-5p	7_129857511_129951320	circRNA	ENSG00000186591	UBE2H	ubiquitin conjugating enzyme E2 H [Source:HGNC Symbol;Acc:HGNC:12484]	-0.607535	0.0096872	0.0872001	no
hsa-miR-92b-3p	11_85996826_86068738	circRNA	ENSG00000073921	PICALM	phosphatidylinositol binding clathrin assembly protein [Source:HGNC Symbol;Acc:HGNC:15514]	-0.701292	0.00170776	0.0538894	no
hsa-miR-6862-5p	11_85996826_86068738	circRNA	ENSG00000073921	PICALM	phosphatidylinositol binding clathrin assembly protein [Source:HGNC Symbol;Acc:HGNC:15514]	-0.602459	0.0104848	0.0903179	no
hsa-miR-1226-3p	4_102714438_102734571	circRNA	ENSG00000109323	MANBA	mannosidase beta [Source:HGNC Symbol;Acc:HGNC:6831]	-0.662855	0.00373147	0.0671316	no
hsa-miR-5010-5p	5_81636557_81650339	circRNA	ENSG00000145687	SSBP2	single stranded DNA binding protein 2 [Source:HGNC Symbol;Acc:HGNC:15831]	-0.489635	0.0460462	0.151623	no
hsa-miR-1260a	13_73943981_73995053	circRNA				-0.540849	0.024976	0.120443	no
hsa-miR-3127-5p	1_61111371_61163075	circRNA	ENSG00000162599	NFIA	nuclear factor I A [Source:HGNC Symbol;Acc:HGNC:7784]	-0.513687	0.0349284	0.134231	no
hsa-miR-6799-3p	6_107744949_107772386	circRNA	ENSG00000146285	SCML4	Scm polycomb group protein like 4 [Source:HGNC Symbol;Acc:HGNC:21397]	-0.782893	0.000202521	0.0325331	no
hsa-miR-6734-5p	14_103386041_103428440	circRNA	ENSG00000075413	MARK3	microtubule affinity regulating kinase 3 [Source:HGNC Symbol;Acc:HGNC:6897]	-0.667545	0.00341185	0.0650885	no
hsa-miR-6511b-3p	5_55649207_55672695	circRNA	ENSG00000177058	SLC38A9	solute carrier family 38 member 9 [Source:HGNC Symbol;Acc:HGNC:26907]	-0.595572	0.0116495	0.0915205	no
hsa-miR-629-3p	15_92900786_92929091	circRNA	ENSG00000173575	CHD2	chromodomain helicase DNA binding protein 2 [Source:HGNC Symbol;Acc:HGNC:1917]	-0.620395	0.00788109	0.0824394	no
hsa-miR-92a-1-5p	15_65729072_65761438	circRNA	ENSG00000174485	DENND4A	DENN domain containing 4A [Source:HGNC Symbol;Acc:HGNC:24321]	-0.572168	0.0163935	0.103807	no
hsa-miR-6862-5p	9_36056980_36065624	circRNA	ENSG00000122707	RECK	reversion inducing cysteine rich protein with kazal motifs [Source:HGNC Symbol;Acc:HGNC:11345]	-0.622046	0.00767019	0.0820465	no
hsa-miR-6825-5p	17_43057052_43074521	circRNA	ENSG00000012048	BRCA1	BRCA1, DNA repair associated [Source:HGNC Symbol;Acc:HGNC:1100]	-0.545894	0.0233988	0.116788	no
hsa-miR-6882-3p	19_10163326_10179982	circRNA	ENSG00000130816	DNMT1	DNA methyltransferase 1 [Source:HGNC Symbol;Acc:HGNC:2976]	-0.681579	0.00258577	0.0589846	no
hsa-miR-224-5p	5_134167170_134174022	circRNA	ENSG00000272772,ENSG00000113558	AC104109.3,SKP1		-0.608131	0.00959675	0.0869723	no
hsa-miR-3180	6_98899268_98934879	circRNA	ENSG00000112234	FBXL4	F-box and leucine rich repeat protein 4 [Source:HGNC Symbol;Acc:HGNC:13601]	-0.623116	0.00753607	0.0818629	no
hsa-miR-3173-5p	7_142463288_142482603	circRNA				-0.568887	0.0171645	0.105972	no
hsa-miR-3127-5p	1_233177802_233236980	circRNA	ENSG00000135749	PCNX2	pecanex 2 [Source:HGNC Symbol;Acc:HGNC:8736]	-0.58723	0.0131954	0.0959841	no
hsa-miR-6780a-5p	2_148329960_148342336	circRNA	ENSG00000204406	MBD5	methyl-CpG binding domain protein 5 [Source:HGNC Symbol;Acc:HGNC:20444]	-0.609182	0.00943894	0.0861949	no
hsa-miR-363-5p	14_31364189_31387375	circRNA	ENSG00000129493	HEATR5A	HEAT repeat containing 5A [Source:HGNC Symbol;Acc:HGNC:20276]	-0.547419	0.0229377	0.116552	no
hsa-miR-1260a	8_100268785_100288267	circRNA	ENSG00000034677,ENSG00000104450	RNF19A,SPAG1		-0.507935	0.0373779	0.138296	no
hsa-miR-6802-3p	4_139137630_139151980	circRNA	ENSG00000109381	ELF2	E74 like ETS transcription factor 2 [Source:HGNC Symbol;Acc:HGNC:3317]	-0.716201	0.00122086	0.0462436	no
hsa-miR-766-3p	6_107744949_107772386	circRNA	ENSG00000146285	SCML4	Scm polycomb group protein like 4 [Source:HGNC Symbol;Acc:HGNC:21397]	-0.613045	0.00887685	0.0845842	no
hsa-miR-125a-3p	2_61498673_61533903	circRNA	ENSG00000082898	XPO1	exportin 1 [Source:HGNC Symbol;Acc:HGNC:12825]	-0.742763	0.000636332	0.0406108	no
hsa-miR-6881-3p	14_90943078_91001159	circRNA	ENSG00000100784	RPS6KA5	ribosomal protein S6 kinase A5 [Source:HGNC Symbol;Acc:HGNC:10434]	-0.54473	0.0237555	0.117484	no
hsa-miR-5010-5p	2_36877891_36894033	circRNA	ENSG00000115808	STRN	striatin [Source:HGNC Symbol;Acc:HGNC:11424]	-0.518628	0.0329239	0.131418	no
hsa-miR-6734-5p	10_26500819_26511906	circRNA	ENSG00000077420	APBB1IP	amyloid beta precursor protein binding family B member 1 interacting protein [Source:HGNC Symbol;Acc:HGNC:17379]	-0.71499	0.00125555	0.0463446	no
hsa-miR-1260a	6_90206569_90271941	circRNA	ENSG00000112182	BACH2	BTB domain and CNC homolog 2 [Source:HGNC Symbol;Acc:HGNC:14078]	-0.544451	0.0238416	0.117757	no
hsa-miR-18b-3p	1_185143357_185151935	circRNA	ENSG00000121486	TRMT1L	tRNA methyltransferase 1 like [Source:HGNC Symbol;Acc:HGNC:16782]	-0.510117	0.036434	0.136688	no
hsa-miR-6780a-5p	17_43057052_43074521	circRNA	ENSG00000012048	BRCA1	BRCA1, DNA repair associated [Source:HGNC Symbol;Acc:HGNC:1100]	-0.519087	0.0327422	0.131253	no
hsa-miR-6780a-5p	3_196062582_196068130	circRNA	ENSG00000072274	TFRC	transferrin receptor [Source:HGNC Symbol;Acc:HGNC:11763]	-0.808127	8.67476e-05	0.0313655	no
hsa-miR-328-3p	6_98899268_98934879	circRNA	ENSG00000112234	FBXL4	F-box and leucine rich repeat protein 4 [Source:HGNC Symbol;Acc:HGNC:13601]	-0.511206	0.0359696	0.136079	no
hsa-miR-6747-3p	1_53860056_53878722	circRNA	ENSG00000058799	YIPF1	Yip1 domain family member 1 [Source:HGNC Symbol;Acc:HGNC:25231]	-0.50689	0.0378366	0.138723	no
hsa-miR-6793-3p	13_73943981_73995053	circRNA				-0.536649	0.0263506	0.121707	no
hsa-miR-4745-3p	X_51327721_51357027	circRNA				-0.55037	0.0220652	0.114561	no
hsa-miR-629-3p	1_207655190_207683957	circRNA	ENSG00000197721	CR1L	complement C3b/C4b receptor 1 like [Source:HGNC Symbol;Acc:HGNC:2335]	-0.613121	0.00886606	0.0845842	no
hsa-miR-210-5p	X_51327721_51357027	circRNA				-0.717447	0.001186	0.0462436	no
hsa-miR-6780a-5p	10_5959754_5966339	circRNA	ENSG00000134470	IL15RA	interleukin 15 receptor subunit alpha [Source:HGNC Symbol;Acc:HGNC:5978]	-0.650343	0.00470459	0.0707906	no
hsa-miR-363-5p	1_176027572_176046324	circRNA	ENSG00000143207	COP1	COP1, E3 ubiquitin ligase [Source:HGNC Symbol;Acc:HGNC:17440]	-0.545456	0.0235325	0.117044	no
hsa-miR-6780a-5p	11_3768581_3782145	circRNA	ENSG00000110713	NUP98	nucleoporin 98 [Source:HGNC Symbol;Acc:HGNC:8068]	-0.523614	0.0309919	0.129512	no
hsa-miR-4685-3p	3_183057311_183071357	circRNA	ENSG00000078070	MCCC1	methylcrotonoyl-CoA carboxylase 1 [Source:HGNC Symbol;Acc:HGNC:6936]	-0.688292	0.0022529	0.0566907	no
hsa-miR-210-5p	13_73943981_73995053	circRNA				-0.696116	0.00191009	0.0565068	no
hsa-miR-2110	11_35196746_35201195	circRNA	ENSG00000026508	CD44	CD44 molecule (Indian blood group) [Source:HGNC Symbol;Acc:HGNC:1681]	-0.583547	0.0139274	0.097717	no
hsa-miR-486-5p	9_100006506_100022226	circRNA	ENSG00000023318	ERP44	endoplasmic reticulum protein 44 [Source:HGNC Symbol;Acc:HGNC:18311]	-0.515554	0.0341604	0.132643	no
hsa-miR-6894-3p	X_51327721_51357027	circRNA				-0.77935	0.00022613	0.0325331	no
hsa-miR-6799-3p	1_65272073_65366196	circRNA	ENSG00000116675	DNAJC6	DnaJ heat shock protein family (Hsp40) member C6 [Source:HGNC Symbol;Acc:HGNC:15469]	-0.602322	0.010507	0.0903179	no
hsa-miR-6782-3p	10_87864454_87933251	circRNA	ENSG00000171862	PTEN	phosphatase and tensin homolog [Source:HGNC Symbol;Acc:HGNC:9588]	-0.573377	0.0161161	0.102886	no
hsa-miR-6782-3p	13_73943981_73995053	circRNA				-0.631421	0.00655692	0.078789	no
hsa-miR-197-3p	2_23857415_23869761	circRNA	ENSG00000119778	ATAD2B	ATPase family, AAA domain containing 2B [Source:HGNC Symbol;Acc:HGNC:29230]	-0.515554	0.0341604	0.132643	no
hsa-miR-6747-3p	4_102714438_102734571	circRNA	ENSG00000109323	MANBA	mannosidase beta [Source:HGNC Symbol;Acc:HGNC:6831]	-0.601903	0.0105753	0.0903179	no
hsa-miR-629-3p	2_23798138_23834078	circRNA	ENSG00000119778	ATAD2B	ATPase family, AAA domain containing 2B [Source:HGNC Symbol;Acc:HGNC:29230]	-0.591873	0.0123162	0.0936876	no
hsa-miR-6511a-3p	5_55649207_55664863	circRNA	ENSG00000177058	SLC38A9	solute carrier family 38 member 9 [Source:HGNC Symbol;Acc:HGNC:26907]	-0.617567	0.00825306	0.0832493	no
hsa-miR-3180-3p	20_62854016_62860308	circRNA	ENSG00000101190	TCFL5	transcription factor like 5 [Source:HGNC Symbol;Acc:HGNC:11646]	-0.814163	6.95473e-05	0.0313655	no
hsa-miR-486-3p	15_101701086_101714963	circRNA	ENSG00000185418	TARSL2	threonyl-tRNA synthetase like 2 [Source:HGNC Symbol;Acc:HGNC:24728]	-0.594468	0.0118455	0.0924212	no
hsa-miR-6799-3p	1_207655190_207683957	circRNA	ENSG00000197721	CR1L	complement C3b/C4b receptor 1 like [Source:HGNC Symbol;Acc:HGNC:2335]	-0.50889	0.0369623	0.138027	no
hsa-miR-6734-5p	10_101800242_101807901	circRNA	ENSG00000198408	OGA	O-GlcNAcase [Source:HGNC Symbol;Acc:HGNC:7056]	-0.621531	0.00773556	0.0820705	no
hsa-miR-1229-3p	2_23798138_23834078	circRNA	ENSG00000119778	ATAD2B	ATPase family, AAA domain containing 2B [Source:HGNC Symbol;Acc:HGNC:29230]	-0.52652	0.0299063	0.127718	no
hsa-miR-6894-3p	6_90206569_90271941	circRNA	ENSG00000112182	BACH2	BTB domain and CNC homolog 2 [Source:HGNC Symbol;Acc:HGNC:14078]	-0.625767	0.00721158	0.0807924	no
hsa-miR-6780a-5p	22_42516011_42577098	circRNA				-0.635193	0.00614741	0.0775555	no
hsa-miR-6780a-5p	4_88938088_88991150	circRNA	ENSG00000138640	FAM13A	family with sequence similarity 13 member A [Source:HGNC Symbol;Acc:HGNC:19367]	-0.685469	0.00238833	0.05773	no
hsa-miR-363-5p	13_73943981_73995053	circRNA				-0.49168	0.0450087	0.150737	no
hsa-miR-6793-3p	1_95134782_95152552	circRNA	ENSG00000271092,ENSG00000152078	TMEM56-RWDD3,TMEM56		-0.736678	0.000743653	0.0414409	no
hsa-miR-18b-3p	2_45546317_45562756	circRNA	ENSG00000068784	SRBD1	S1 RNA binding domain 1 [Source:HGNC Symbol;Acc:HGNC:25521]	-0.496316	0.0427224	0.146887	no
hsa-miR-6894-3p	11_2969803_2979237	circRNA	ENSG00000205531	NAP1L4	nucleosome assembly protein 1 like 4 [Source:HGNC Symbol;Acc:HGNC:7640]	-0.560736	0.0192037	0.110269	no
hsa-miR-509-3-5p	9_128471308_128473741	circRNA	ENSG00000136811	ODF2	outer dense fiber of sperm tails 2 [Source:HGNC Symbol;Acc:HGNC:8114]	-0.484657	0.0486471	0.155495	no
hsa-miR-6825-5p	X_51327721_51357027	circRNA				-0.77367	0.000268763	0.0335771	no
hsa-miR-3127-5p	10_73692043_73713332	circRNA				-0.517558	0.0333502	0.132087	no
hsa-miR-6780a-5p	9_109050283_109060452	circRNA	ENSG00000106771	TMEM245	transmembrane protein 245 [Source:HGNC Symbol;Acc:HGNC:1363]	-0.697791	0.00184258	0.0554456	no
hsa-miR-6747-3p	17_43057052_43074521	circRNA	ENSG00000012048	BRCA1	BRCA1, DNA repair associated [Source:HGNC Symbol;Acc:HGNC:1100]	-0.602256	0.0105178	0.0903179	no
hsa-miR-6862-5p	7_129857511_129951320	circRNA	ENSG00000186591	UBE2H	ubiquitin conjugating enzyme E2 H [Source:HGNC Symbol;Acc:HGNC:12484]	-0.573996	0.0159757	0.102576	no
hsa-miR-6780a-5p	20_51454548_51475660	circRNA	ENSG00000101096	NFATC2	nuclear factor of activated T cells 2 [Source:HGNC Symbol;Acc:HGNC:7776]	-0.516219	0.0338898	0.132117	no
hsa-miR-4732-5p	7_92457552_92492286	circRNA				-0.557347	0.0201053	0.111852	no
hsa-miR-4732-5p	12_89459638_89525204	circRNA	ENSG00000139323	POC1B	POC1 centriolar protein B [Source:HGNC Symbol;Acc:HGNC:30836]	-0.487799	0.0469932	0.153138	no
hsa-miR-1260a	6_107904629_107924932	circRNA	ENSG00000025796	SEC63	SEC63 homolog, protein translocation regulator [Source:HGNC Symbol;Acc:HGNC:21082]	-0.562439	0.0187627	0.10897	no
hsa-miR-1908-5p	13_113585774_113640375	circRNA	ENSG00000198176	TFDP1	transcription factor Dp-1 [Source:HGNC Symbol;Acc:HGNC:11749]	-0.483005	0.049534	0.156915	no
hsa-miR-6511b-3p	1_65272073_65366196	circRNA	ENSG00000116675	DNAJC6	DnaJ heat shock protein family (Hsp40) member C6 [Source:HGNC Symbol;Acc:HGNC:15469]	-0.515884	0.0340259	0.132375	no
hsa-miR-6511a-3p	2_171447687_171476950	circRNA	ENSG00000115827	DCAF17	DDB1 and CUL4 associated factor 17 [Source:HGNC Symbol;Acc:HGNC:25784]	-0.618732	0.00809818	0.0832493	no
hsa-miR-6780a-5p	3_183057311_183071357	circRNA	ENSG00000078070	MCCC1	methylcrotonoyl-CoA carboxylase 1 [Source:HGNC Symbol;Acc:HGNC:6936]	-0.613727	0.00878035	0.0845842	no
hsa-miR-3127-5p	2_24522329_24556055	circRNA	ENSG00000084676	NCOA1	nuclear receptor coactivator 1 [Source:HGNC Symbol;Acc:HGNC:7668]	-0.606438	0.00985525	0.0876022	no
hsa-miR-6780a-5p	5_60748267_60767903	circRNA				-0.606722	0.00981153	0.0876022	no
hsa-miR-1226-3p	6_90206569_90271941	circRNA	ENSG00000112182	BACH2	BTB domain and CNC homolog 2 [Source:HGNC Symbol;Acc:HGNC:14078]	-0.598406	0.0111585	0.0906626	no
hsa-miR-6855-5p	11_78103980_78121174	circRNA	ENSG00000159063	ALG8	ALG8, alpha-1,3-glucosyltransferase [Source:HGNC Symbol;Acc:HGNC:23161]	-0.55046	0.0220391	0.114531	no
hsa-miR-6780a-5p	6_107904629_107924932	circRNA	ENSG00000025796	SEC63	SEC63 homolog, protein translocation regulator [Source:HGNC Symbol;Acc:HGNC:21082]	-0.572461	0.0163259	0.103495	no
hsa-miR-6727-3p	10_26500819_26511906	circRNA	ENSG00000077420	APBB1IP	amyloid beta precursor protein binding family B member 1 interacting protein [Source:HGNC Symbol;Acc:HGNC:17379]	-0.490991	0.0453567	0.150875	no
hsa-miR-6855-5p	19_10163326_10179982	circRNA	ENSG00000130816	DNMT1	DNA methyltransferase 1 [Source:HGNC Symbol;Acc:HGNC:2976]	-0.632379	0.00645092	0.0786292	no
hsa-miR-6780a-5p	4_88107184_88113553	circRNA	ENSG00000118777	ABCG2	ATP binding cassette subfamily G member 2 (Junior blood group) [Source:HGNC Symbol;Acc:HGNC:74]	-0.700383	0.00174194	0.0539317	no
hsa-miR-6734-5p	15_92900786_92929091	circRNA	ENSG00000173575	CHD2	chromodomain helicase DNA binding protein 2 [Source:HGNC Symbol;Acc:HGNC:1917]	-0.548429	0.0226359	0.115831	no
hsa-miR-1260a	20_62854016_62860308	circRNA	ENSG00000101190	TCFL5	transcription factor like 5 [Source:HGNC Symbol;Acc:HGNC:11646]	-0.676738	0.00284987	0.0598154	no
hsa-miR-6780a-5p	20_49072286_49075520	circRNA	ENSG00000124207	CSE1L	chromosome segregation 1 like [Source:HGNC Symbol;Acc:HGNC:2431]	-0.679156	0.00271532	0.0597792	no
hsa-miR-6511b-3p	10_96544076_96576829	circRNA	ENSG00000077147	TM9SF3	transmembrane 9 superfamily member 3 [Source:HGNC Symbol;Acc:HGNC:21529]	-0.642157	0.00544554	0.0739968	no
hsa-miR-6825-5p	22_42516011_42577098	circRNA				-0.597186	0.0113678	0.0909578	no
hsa-miR-363-5p	6_98899268_98934879	circRNA	ENSG00000112234	FBXL4	F-box and leucine rich repeat protein 4 [Source:HGNC Symbol;Acc:HGNC:13601]	-0.578208	0.015045	0.100654	no
hsa-miR-1538	4_78872614_78887284	circRNA	ENSG00000138756	BMP2K	BMP2 inducible kinase [Source:HGNC Symbol;Acc:HGNC:18041]	-0.490967	0.0453688	0.150875	no
hsa-miR-3180	1_65272073_65366196	circRNA	ENSG00000116675	DNAJC6	DnaJ heat shock protein family (Hsp40) member C6 [Source:HGNC Symbol;Acc:HGNC:15469]	-0.618177	0.00817163	0.0832493	no
hsa-miR-5100	19_10163326_10179982	circRNA	ENSG00000130816	DNMT1	DNA methyltransferase 1 [Source:HGNC Symbol;Acc:HGNC:2976]	-0.764442	0.000352267	0.0339131	no
hsa-miR-210-5p	16_15611592_15623126	circRNA	ENSG00000166783	MARF1	meiosis regulator and mRNA stability factor 1 [Source:HGNC Symbol;Acc:HGNC:29562]	-0.527754	0.0294547	0.127505	no
hsa-miR-92b-3p	4_42551198_42556040	circRNA	ENSG00000124406	ATP8A1	ATPase phospholipid transporting 8A1 [Source:HGNC Symbol;Acc:HGNC:13531]	-0.505212	0.0385823	0.140176	no
hsa-miR-363-5p	10_5768213_5800705	circRNA	ENSG00000057608	GDI2	GDP dissociation inhibitor 2 [Source:HGNC Symbol;Acc:HGNC:4227]	-0.552418	0.0214751	0.113473	no
hsa-miR-6799-3p	15_101701086_101714963	circRNA	ENSG00000185418	TARSL2	threonyl-tRNA synthetase like 2 [Source:HGNC Symbol;Acc:HGNC:24728]	-0.552006	0.0215929	0.113706	no
hsa-miR-6882-3p	2_196154968_196163427	circRNA	ENSG00000081320	STK17B	serine/threonine kinase 17b [Source:HGNC Symbol;Acc:HGNC:11396]	-0.655703	0.00426536	0.0689632	no
hsa-miR-4685-3p	13_113585774_113640375	circRNA	ENSG00000198176	TFDP1	transcription factor Dp-1 [Source:HGNC Symbol;Acc:HGNC:11749]	-0.504236	0.0390208	0.140633	no
hsa-miR-6749-3p	10_5959754_5966339	circRNA	ENSG00000134470	IL15RA	interleukin 15 receptor subunit alpha [Source:HGNC Symbol;Acc:HGNC:5978]	-0.539209	0.0255059	0.120987	no
hsa-miR-6749-3p	11_85996826_86068738	circRNA	ENSG00000073921	PICALM	phosphatidylinositol binding clathrin assembly protein [Source:HGNC Symbol;Acc:HGNC:15514]	-0.692234	0.00207439	0.0566907	no
hsa-miR-1976	11_16014942_16049938	circRNA	ENSG00000110693	SOX6	SRY-box 6 [Source:HGNC Symbol;Acc:HGNC:16421]	-0.670588	0.00321668	0.0641079	no
hsa-miR-6734-5p	1_233177802_233236980	circRNA	ENSG00000135749	PCNX2	pecanex 2 [Source:HGNC Symbol;Acc:HGNC:8736]	-0.493932	0.0438871	0.148454	no
hsa-miR-6894-3p	9_37160065_37165935	circRNA	ENSG00000147905	ZCCHC7	zinc finger CCHC-type containing 7 [Source:HGNC Symbol;Acc:HGNC:26209]	-0.618408	0.00814096	0.0832493	no
hsa-miR-363-5p	2_61498673_61533903	circRNA	ENSG00000082898	XPO1	exportin 1 [Source:HGNC Symbol;Acc:HGNC:12825]	-0.589822	0.0126986	0.0946564	no
hsa-miR-6859-3p	7_129857511_129951320	circRNA	ENSG00000186591	UBE2H	ubiquitin conjugating enzyme E2 H [Source:HGNC Symbol;Acc:HGNC:12484]	-0.529028	0.0289934	0.126972	no
hsa-miR-1226-3p	3_20099862_20152365	circRNA	ENSG00000114166	KAT2B	lysine acetyltransferase 2B [Source:HGNC Symbol;Acc:HGNC:8638]	-0.667545	0.00341185	0.0650885	no
hsa-miR-1229-3p	14_31364189_31387375	circRNA	ENSG00000129493	HEATR5A	HEAT repeat containing 5A [Source:HGNC Symbol;Acc:HGNC:20276]	-0.662985	0.00372233	0.0671316	no
hsa-miR-6780a-5p	15_65715478_65741784	circRNA	ENSG00000174485	DENND4A	DENN domain containing 4A [Source:HGNC Symbol;Acc:HGNC:24321]	-0.528252	0.0292735	0.127166	no
hsa-miR-4732-3p	7_142463288_142482603	circRNA				-0.502856	0.0396477	0.141902	no
hsa-miR-6780a-5p	1_95134782_95152552	circRNA	ENSG00000271092,ENSG00000152078	TMEM56-RWDD3,TMEM56		-0.817742	6.07786e-05	0.0313655	no
hsa-miR-1260a	15_92900786_92929091	circRNA	ENSG00000173575	CHD2	chromodomain helicase DNA binding protein 2 [Source:HGNC Symbol;Acc:HGNC:1917]	-0.48639	0.0477296	0.154036	no
hsa-miR-3180-3p	13_59692717_59697771	circRNA	ENSG00000139734	DIAPH3	diaphanous related formin 3 [Source:HGNC Symbol;Acc:HGNC:15480]	-0.572864	0.0162333	0.103138	no
hsa-miR-6511b-3p	8_19704761_19715024	circRNA	ENSG00000147408	CSGALNACT1	chondroitin sulfate N-acetylgalactosaminyltransferase 1 [Source:HGNC Symbol;Acc:HGNC:24290]	-0.55046	0.0220391	0.114531	no
hsa-miR-1229-3p	2_171447687_171476950	circRNA	ENSG00000115827	DCAF17	DDB1 and CUL4 associated factor 17 [Source:HGNC Symbol;Acc:HGNC:25784]	-0.557314	0.0201144	0.111852	no
hsa-miR-629-3p	12_122534664_122543634	circRNA	ENSG00000184445	KNTC1	kinetochore associated 1 [Source:HGNC Symbol;Acc:HGNC:17255]	-0.724508	0.00100359	0.0436841	no
hsa-miR-6780a-5p	10_96544076_96576829	circRNA	ENSG00000077147	TM9SF3	transmembrane 9 superfamily member 3 [Source:HGNC Symbol;Acc:HGNC:21529]	-0.666667	0.00346996	0.0656979	no
hsa-miR-23a-5p	3_57569687_57584464	circRNA				-0.562621	0.0187161	0.10881	no
hsa-miR-92b-3p	8_42459896_42472654	circRNA	ENSG00000168575	SLC20A2	solute carrier family 20 member 2 [Source:HGNC Symbol;Acc:HGNC:10947]	-0.530775	0.0283704	0.125534	no
hsa-miR-423-5p	8_100274953_100288267	circRNA	ENSG00000034677,ENSG00000104450	RNF19A,SPAG1		-0.599363	0.0109963	0.0903179	no
hsa-miR-6780a-5p	7_139371387_139398697	circRNA	ENSG00000146963	LUC7L2	LUC7 like 2, pre-mRNA splicing factor [Source:HGNC Symbol;Acc:HGNC:21608]	-0.609522	0.00938843	0.08598	no
hsa-miR-1343-3p	6_36894504_36916574	circRNA	ENSG00000198663	C6orf89	chromosome 6 open reading frame 89 [Source:HGNC Symbol;Acc:HGNC:21114]	-0.599578	0.0109602	0.0903179	no
hsa-miR-1260a	13_79365578_79378907	circRNA	ENSG00000139746	RBM26	RNA binding motif protein 26 [Source:HGNC Symbol;Acc:HGNC:20327]	-0.482623	0.0497407	0.157192	no
hsa-miR-766-3p	15_65715478_65741784	circRNA	ENSG00000174485	DENND4A	DENN domain containing 4A [Source:HGNC Symbol;Acc:HGNC:24321]	-0.523173	0.031159	0.129753	no
hsa-miR-6511b-3p	5_55649207_55664863	circRNA	ENSG00000177058	SLC38A9	solute carrier family 38 member 9 [Source:HGNC Symbol;Acc:HGNC:26907]	-0.649536	0.00477384	0.0713242	no
hsa-miR-25-5p	8_19704761_19715024	circRNA	ENSG00000147408	CSGALNACT1	chondroitin sulfate N-acetylgalactosaminyltransferase 1 [Source:HGNC Symbol;Acc:HGNC:24290]	-0.565666	0.0179491	0.107316	no
hsa-miR-363-5p	5_60748267_60767903	circRNA				-0.533733	0.0273388	0.123051	no
hsa-miR-664b-3p	7_129857511_129951320	circRNA	ENSG00000186591	UBE2H	ubiquitin conjugating enzyme E2 H [Source:HGNC Symbol;Acc:HGNC:12484]	-0.583734	0.0138894	0.097717	no
hsa-miR-6780a-5p	2_23798138_23834078	circRNA	ENSG00000119778	ATAD2B	ATPase family, AAA domain containing 2B [Source:HGNC Symbol;Acc:HGNC:29230]	-0.657226	0.00414677	0.0689632	no
hsa-miR-6749-3p	1_207655190_207683957	circRNA	ENSG00000197721	CR1L	complement C3b/C4b receptor 1 like [Source:HGNC Symbol;Acc:HGNC:2335]	-0.581239	0.0144023	0.0987367	no
hsa-miR-363-5p	5_171964198_171997051	circRNA	ENSG00000072803	FBXW11	F-box and WD repeat domain containing 11 [Source:HGNC Symbol;Acc:HGNC:13607]	-0.677784	0.00279101	0.0598154	no
hsa-miR-204-5p	12_801904_813814	circRNA	ENSG00000060237	WNK1	WNK lysine deficient protein kinase 1 [Source:HGNC Symbol;Acc:HGNC:14540]	-0.575377	0.0156657	0.101809	no
hsa-miR-664b-3p	2_196154968_196163427	circRNA	ENSG00000081320	STK17B	serine/threonine kinase 17b [Source:HGNC Symbol;Acc:HGNC:11396]	-0.593098	0.0120922	0.0934061	no
hsa-miR-125a-3p	1_25321889_25356853	circRNA				-0.508721	0.0370358	0.138027	no
hsa-miR-6855-5p	X_51327721_51357027	circRNA				-0.781329	0.000212673	0.0325331	no
hsa-miR-23a-5p	6_98899268_98934879	circRNA	ENSG00000112234	FBXL4	F-box and leucine rich repeat protein 4 [Source:HGNC Symbol;Acc:HGNC:13601]	-0.62784	0.00696575	0.079769	no
hsa-miR-1229-3p	13_113585774_113640375	circRNA	ENSG00000198176	TFDP1	transcription factor Dp-1 [Source:HGNC Symbol;Acc:HGNC:11749]	-0.570583	0.0167625	0.104512	no
hsa-miR-6802-3p	17_43057052_43074521	circRNA	ENSG00000012048	BRCA1	BRCA1, DNA repair associated [Source:HGNC Symbol;Acc:HGNC:1100]	-0.484673	0.0486387	0.155495	no
hsa-miR-766-3p	7_129857511_129951320	circRNA	ENSG00000186591	UBE2H	ubiquitin conjugating enzyme E2 H [Source:HGNC Symbol;Acc:HGNC:12484]	-0.514839	0.0344531	0.132944	no
hsa-miR-6780a-5p	9_123440360_123454779	circRNA	ENSG00000119522,ENSG00000148204	DENND1A,CRB2		-0.684699	0.00242638	0.05773	no
hsa-miR-6511a-3p	9_109050283_109060452	circRNA	ENSG00000106771	TMEM245	transmembrane protein 245 [Source:HGNC Symbol;Acc:HGNC:1363]	-0.510142	0.036423	0.136688	no
hsa-miR-3173-5p	12_89459638_89525204	circRNA	ENSG00000139323	POC1B	POC1 centriolar protein B [Source:HGNC Symbol;Acc:HGNC:30836]	-0.560257	0.0193292	0.110269	no
hsa-miR-5010-5p	17_4296717_4331888	circRNA	ENSG00000132388	UBE2G1	ubiquitin conjugating enzyme E2 G1 [Source:HGNC Symbol;Acc:HGNC:12482]	-0.655382	0.00429069	0.0689632	no
hsa-miR-6780a-5p	4_145081660_145096111	circRNA	ENSG00000164162	ANAPC10	anaphase promoting complex subunit 10 [Source:HGNC Symbol;Acc:HGNC:24077]	-0.553392	0.0211987	0.11306	no
hsa-miR-6509-3p	1_95134782_95152552	circRNA	ENSG00000271092,ENSG00000152078	TMEM56-RWDD3,TMEM56		-0.670238	0.00323863	0.0643197	no
hsa-miR-6825-5p	9_123440360_123454779	circRNA	ENSG00000119522,ENSG00000148204	DENND1A,CRB2		-0.658317	0.00406349	0.0688973	no
hsa-miR-616-3p	3_196069455_196077122	circRNA	ENSG00000072274	TFRC	transferrin receptor [Source:HGNC Symbol;Acc:HGNC:11763]	-0.732843	0.000818701	0.0419392	no
hsa-miR-6734-5p	1_95134782_95152552	circRNA	ENSG00000271092,ENSG00000152078	TMEM56-RWDD3,TMEM56		-0.758223	0.000419938	0.0365503	no
hsa-miR-6511b-3p	7_129857511_129951320	circRNA	ENSG00000186591	UBE2H	ubiquitin conjugating enzyme E2 H [Source:HGNC Symbol;Acc:HGNC:12484]	-0.62883	0.00685075	0.0792511	no
hsa-miR-6862-5p	6_107904629_107924932	circRNA	ENSG00000025796	SEC63	SEC63 homolog, protein translocation regulator [Source:HGNC Symbol;Acc:HGNC:21082]	-0.616318	0.00842172	0.0837638	no
hsa-miR-6855-5p	2_148329960_148342336	circRNA	ENSG00000204406	MBD5	methyl-CpG binding domain protein 5 [Source:HGNC Symbol;Acc:HGNC:20444]	-0.643483	0.00531949	0.0739968	no
hsa-miR-194-3p	13_113585774_113640375	circRNA	ENSG00000198176	TFDP1	transcription factor Dp-1 [Source:HGNC Symbol;Acc:HGNC:11749]	-0.544044	0.0239678	0.118277	no
hsa-miR-210-5p	7_92457552_92492286	circRNA				-0.565979	0.0178716	0.107247	no
hsa-miR-6780a-5p	5_109716160_109729513	circRNA	ENSG00000112893	MAN2A1	mannosidase alpha class 2A member 1 [Source:HGNC Symbol;Acc:HGNC:6824]	-0.490967	0.0453688	0.150875	no
hsa-miR-210-5p	1_207655190_207683957	circRNA	ENSG00000197721	CR1L	complement C3b/C4b receptor 1 like [Source:HGNC Symbol;Acc:HGNC:2335]	-0.676885	0.0028415	0.0598154	no
hsa-miR-636	13_49976333_50027406	circRNA				-0.504908	0.0387183	0.140176	no
hsa-miR-6509-3p	8_140846260_140890769	circRNA	ENSG00000169398	PTK2	protein tyrosine kinase 2 [Source:HGNC Symbol;Acc:HGNC:9611]	-0.534641	0.0270279	0.123012	no
hsa-miR-4685-3p	X_51327721_51357027	circRNA				-0.555284	0.02067	0.112243	no
hsa-miR-574-3p	6_90206569_90271941	circRNA	ENSG00000112182	BACH2	BTB domain and CNC homolog 2 [Source:HGNC Symbol;Acc:HGNC:14078]	-0.633967	0.00627821	0.0779102	no
hsa-miR-5010-5p	2_112074912_112089718	circRNA	ENSG00000153214	TMEM87B	transmembrane protein 87B [Source:HGNC Symbol;Acc:HGNC:25913]	-0.530714	0.0283919	0.125534	no
hsa-miR-6727-3p	12_89459638_89525204	circRNA	ENSG00000139323	POC1B	POC1 centriolar protein B [Source:HGNC Symbol;Acc:HGNC:30836]	-0.559447	0.0195428	0.110671	no
hsa-miR-363-5p	17_60252381_60265474	circRNA	ENSG00000170832	USP32	ubiquitin specific peptidase 32 [Source:HGNC Symbol;Acc:HGNC:19143]	-0.495237	0.0432468	0.147776	no
hsa-miR-6734-5p	7_129857511_129951320	circRNA	ENSG00000186591	UBE2H	ubiquitin conjugating enzyme E2 H [Source:HGNC Symbol;Acc:HGNC:12484]	-0.641356	0.00552278	0.0742008	no
hsa-miR-363-5p	17_4296717_4331888	circRNA	ENSG00000132388	UBE2G1	ubiquitin conjugating enzyme E2 G1 [Source:HGNC Symbol;Acc:HGNC:12482]	-0.561104	0.0191078	0.110269	no
hsa-miR-2110	7_129857511_129951320	circRNA	ENSG00000186591	UBE2H	ubiquitin conjugating enzyme E2 H [Source:HGNC Symbol;Acc:HGNC:12484]	-0.587492	0.0131444	0.0959841	no
hsa-miR-3127-5p	9_75077159_75080941	circRNA	ENSG00000106733	NMRK1	nicotinamide riboside kinase 1 [Source:HGNC Symbol;Acc:HGNC:26057]	-0.645211	0.00515885	0.073125	no
hsa-miR-6799-3p	22_42516011_42577098	circRNA				-0.517474	0.033384	0.132087	no
hsa-miR-204-5p	7_129857511_129886747	circRNA	ENSG00000186591	UBE2H	ubiquitin conjugating enzyme E2 H [Source:HGNC Symbol;Acc:HGNC:12484]	-0.521266	0.0318903	0.129966	no
hsa-miR-1260a	7_129857511_129951320	circRNA	ENSG00000186591	UBE2H	ubiquitin conjugating enzyme E2 H [Source:HGNC Symbol;Acc:HGNC:12484]	-0.52486	0.0305228	0.128671	no
hsa-miR-423-5p	5_180851381_180859006	circRNA	ENSG00000196670	ZFP62	ZFP62 zinc finger protein [Source:HGNC Symbol;Acc:HGNC:23241]	-0.741402	0.000659136	0.0406945	no
hsa-miR-6511b-3p	2_171447687_171476950	circRNA	ENSG00000115827	DCAF17	DDB1 and CUL4 associated factor 17 [Source:HGNC Symbol;Acc:HGNC:25784]	-0.740431	0.000675833	0.0412767	no
hsa-miR-766-3p	15_65722848_65756472	circRNA	ENSG00000174485	DENND4A	DENN domain containing 4A [Source:HGNC Symbol;Acc:HGNC:24321]	-0.482843	0.0496216	0.156932	no
hsa-miR-194-3p	7_142463288_142482603	circRNA				-0.520633	0.0321361	0.130412	no
hsa-miR-1260a	12_122534664_122539754	circRNA	ENSG00000184445	KNTC1	kinetochore associated 1 [Source:HGNC Symbol;Acc:HGNC:17255]	-0.692876	0.00204644	0.0566907	no
hsa-miR-6825-5p	6_90206569_90271941	circRNA	ENSG00000112182	BACH2	BTB domain and CNC homolog 2 [Source:HGNC Symbol;Acc:HGNC:14078]	-0.708926	0.00144171	0.0486277	no
hsa-miR-6881-3p	16_15611592_15623126	circRNA	ENSG00000166783	MARF1	meiosis regulator and mRNA stability factor 1 [Source:HGNC Symbol;Acc:HGNC:29562]	-0.496927	0.0424278	0.146588	no
hsa-miR-6780a-5p	13_72731281_72743602	circRNA	ENSG00000136122	BORA	bora, aurora kinase A activator [Source:HGNC Symbol;Acc:HGNC:24724]	-0.538736	0.0256602	0.120987	no
hsa-miR-6855-5p	12_89459638_89525204	circRNA	ENSG00000139323	POC1B	POC1 centriolar protein B [Source:HGNC Symbol;Acc:HGNC:30836]	-0.518852	0.0328351	0.131418	no
hsa-miR-6509-3p	6_90206569_90271941	circRNA	ENSG00000112182	BACH2	BTB domain and CNC homolog 2 [Source:HGNC Symbol;Acc:HGNC:14078]	-0.611895	0.00904137	0.0851658	no
hsa-miR-4685-3p	14_22370606_22382405	circRNA				-0.533415	0.0274483	0.123051	no
hsa-miR-6881-3p	6_90206569_90271941	circRNA	ENSG00000112182	BACH2	BTB domain and CNC homolog 2 [Source:HGNC Symbol;Acc:HGNC:14078]	-0.595954	0.0115825	0.0912463	no
hsa-miR-6855-5p	15_76857809_76883876	circRNA	ENSG00000140386	SCAPER	S-phase cyclin A associated protein in the ER [Source:HGNC Symbol;Acc:HGNC:13081]	-0.559238	0.0195984	0.110762	no
hsa-miR-3180-3p	3_47086195_47103423	circRNA	ENSG00000181555	SETD2	SET domain containing 2, histone lysine methyltransferase [Source:HGNC Symbol;Acc:HGNC:18420]	-0.546632	0.0231746	0.116585	no
hsa-miR-6734-5p	9_109050283_109060452	circRNA	ENSG00000106771	TMEM245	transmembrane protein 245 [Source:HGNC Symbol;Acc:HGNC:1363]	-0.584768	0.0136812	0.0973798	no
hsa-miR-6511a-3p	7_129857511_129951320	circRNA	ENSG00000186591	UBE2H	ubiquitin conjugating enzyme E2 H [Source:HGNC Symbol;Acc:HGNC:12484]	-0.585346	0.013566	0.0969241	no
hsa-miR-6509-3p	X_51327721_51357027	circRNA				-0.633909	0.0062845	0.0779102	no
hsa-miR-6780a-5p	13_40908159_40914105	circRNA				-0.600019	0.0108864	0.0903179	no
hsa-miR-363-5p	4_42551198_42556040	circRNA	ENSG00000124406	ATP8A1	ATPase phospholipid transporting 8A1 [Source:HGNC Symbol;Acc:HGNC:13531]	-0.55794	0.0199452	0.111615	no
hsa-miR-629-3p	3_47169169_47175828	circRNA				-0.570583	0.0167625	0.104512	no
hsa-miR-6780a-5p	4_139137630_139151980	circRNA	ENSG00000109381	ELF2	E74 like ETS transcription factor 2 [Source:HGNC Symbol;Acc:HGNC:3317]	-0.651715	0.0045888	0.0707906	no
hsa-miR-3173-5p	11_85996826_86068738	circRNA	ENSG00000073921	PICALM	phosphatidylinositol binding clathrin assembly protein [Source:HGNC Symbol;Acc:HGNC:15514]	-0.553788	0.0210875	0.11306	no
hsa-miR-423-5p	8_100268785_100288267	circRNA	ENSG00000034677,ENSG00000104450	RNF19A,SPAG1		-0.566347	0.0177807	0.107213	no
hsa-miR-486-5p	7_129857511_129951320	circRNA	ENSG00000186591	UBE2H	ubiquitin conjugating enzyme E2 H [Source:HGNC Symbol;Acc:HGNC:12484]	-0.589998	0.0126656	0.0945672	no
hsa-miR-1976	15_101701086_101714963	circRNA	ENSG00000185418	TARSL2	threonyl-tRNA synthetase like 2 [Source:HGNC Symbol;Acc:HGNC:24728]	-0.498928	0.0414733	0.144876	no
hsa-miR-6747-3p	11_16014942_16049938	circRNA	ENSG00000110693	SOX6	SRY-box 6 [Source:HGNC Symbol;Acc:HGNC:16421]	-0.629531	0.00677019	0.0792511	no
hsa-miR-766-3p	1_65272073_65366196	circRNA	ENSG00000116675	DNAJC6	DnaJ heat shock protein family (Hsp40) member C6 [Source:HGNC Symbol;Acc:HGNC:15469]	-0.584486	0.0137378	0.0975385	no
hsa-miR-629-3p	10_68459104_68465812	circRNA	ENSG00000138346	DNA2	DNA replication helicase/nuclease 2 [Source:HGNC Symbol;Acc:HGNC:2939]	-0.547408	0.022941	0.116552	no
hsa-miR-423-5p	2_11455342_11457233	circRNA	ENSG00000169016	E2F6	E2F transcription factor 6 [Source:HGNC Symbol;Acc:HGNC:3120]	-0.645114	0.00516774	0.073125	no
hsa-miR-486-3p	4_102714438_102734571	circRNA	ENSG00000109323	MANBA	mannosidase beta [Source:HGNC Symbol;Acc:HGNC:6831]	-0.759363	0.000406786	0.0365503	no
hsa-miR-6780a-5p	17_63760914_63766194	circRNA	ENSG00000108588	CCDC47	coiled-coil domain containing 47 [Source:HGNC Symbol;Acc:HGNC:24856]	-0.687922	0.00227033	0.0566907	no
hsa-miR-616-3p	4_102906536_102949427	circRNA	ENSG00000164037	SLC9B1	solute carrier family 9 member B1 [Source:HGNC Symbol;Acc:HGNC:24244]	-0.513736	0.034908	0.134231	no
hsa-miR-301b-3p	19_54218645_54252106	circRNA				-0.533721	0.0273431	0.123051	no
hsa-miR-6511a-3p	4_102714438_102734571	circRNA	ENSG00000109323	MANBA	mannosidase beta [Source:HGNC Symbol;Acc:HGNC:6831]	-0.684862	0.0024183	0.05773	no
hsa-miR-766-3p	5_60748267_60767903	circRNA				-0.55198	0.0216002	0.113706	no
hsa-miR-4433b-5p	17_80294720_80295813	circRNA	ENSG00000173821	AC124319.1	ring finger protein 213 [Source:NCBI gene;Acc:57674]	-0.533427	0.0274443	0.123051	no
hsa-miR-6780a-5p	17_4296717_4331888	circRNA	ENSG00000132388	UBE2G1	ubiquitin conjugating enzyme E2 G1 [Source:HGNC Symbol;Acc:HGNC:12482]	-0.556542	0.0203242	0.111852	no
hsa-miR-3127-5p	2_174915058_174952202	circRNA	ENSG00000128656	CHN1	chimerin 1 [Source:HGNC Symbol;Acc:HGNC:1943]	-0.49727	0.0422628	0.146195	no
hsa-miR-210-5p	13_113585774_113640375	circRNA	ENSG00000198176	TFDP1	transcription factor Dp-1 [Source:HGNC Symbol;Acc:HGNC:11749]	-0.498928	0.0414733	0.144876	no
hsa-miR-486-3p	1_229489955_229496047	circRNA	ENSG00000069248	NUP133	nucleoporin 133 [Source:HGNC Symbol;Acc:HGNC:18016]	-0.522744	0.0313223	0.129958	no
hsa-miR-6780a-5p	3_57569687_57584464	circRNA				-0.652853	0.00449456	0.0703282	no
hsa-miR-3180-3p	10_68459104_68465812	circRNA	ENSG00000138346	DNA2	DNA replication helicase/nuclease 2 [Source:HGNC Symbol;Acc:HGNC:2939]	-0.587217	0.0131978	0.0959841	no
hsa-miR-5010-3p	1_233177802_233236980	circRNA	ENSG00000135749	PCNX2	pecanex 2 [Source:HGNC Symbol;Acc:HGNC:8736]	-0.495304	0.043214	0.147776	no
hsa-miR-6855-5p	9_96551796_96565483	circRNA	ENSG00000081377	CDC14B	cell division cycle 14B [Source:HGNC Symbol;Acc:HGNC:1719]	-0.511724	0.0357503	0.135555	no
hsa-miR-6799-3p	1_233177802_233236980	circRNA	ENSG00000135749	PCNX2	pecanex 2 [Source:HGNC Symbol;Acc:HGNC:8736]	-0.577626	0.0151711	0.100786	no
hsa-miR-6511b-3p	14_103386041_103428440	circRNA	ENSG00000075413	MARK3	microtubule affinity regulating kinase 3 [Source:HGNC Symbol;Acc:HGNC:6897]	-0.570764	0.0167201	0.104477	no
hsa-miR-301a-5p	8_131843592_131877510	circRNA				-0.607992	0.00961784	0.0869723	no
hsa-miR-6727-3p	1_32631827_32634792	circRNA	ENSG00000176261	ZBTB8OS	zinc finger and BTB domain containing 8 opposite strand [Source:HGNC Symbol;Acc:HGNC:24094]	-0.517344	0.0334362	0.132087	no
hsa-miR-1226-3p	14_22370606_22382405	circRNA				-0.570202	0.016852	0.104655	no
hsa-miR-363-5p	6_17665239_17675770	circRNA	ENSG00000124789	NUP153	nucleoporin 153 [Source:HGNC Symbol;Acc:HGNC:8062]	-0.608131	0.00959675	0.0869723	no
hsa-miR-6782-3p	15_90980884_90981981	circRNA	ENSG00000198901	PRC1	protein regulator of cytokinesis 1 [Source:HGNC Symbol;Acc:HGNC:9341]	-0.578724	0.0149341	0.100418	no
hsa-miR-1229-3p	4_102714438_102734571	circRNA	ENSG00000109323	MANBA	mannosidase beta [Source:HGNC Symbol;Acc:HGNC:6831]	-0.556189	0.0204209	0.111852	no
hsa-miR-6882-3p	9_37349357_37357459	circRNA	ENSG00000147905	ZCCHC7	zinc finger CCHC-type containing 7 [Source:HGNC Symbol;Acc:HGNC:26209]	-0.490022	0.0458487	0.151407	no
hsa-miR-92a-1-5p	2_24522329_24556055	circRNA	ENSG00000084676	NCOA1	nuclear receptor coactivator 1 [Source:HGNC Symbol;Acc:HGNC:7668]	-0.610681	0.00921758	0.0857952	no
hsa-miR-6881-3p	5_55649207_55664863	circRNA	ENSG00000177058	SLC38A9	solute carrier family 38 member 9 [Source:HGNC Symbol;Acc:HGNC:26907]	-0.605543	0.00999416	0.0882843	no
hsa-miR-92a-1-5p	10_26500819_26511906	circRNA	ENSG00000077420	APBB1IP	amyloid beta precursor protein binding family B member 1 interacting protein [Source:HGNC Symbol;Acc:HGNC:17379]	-0.724138	0.00101252	0.0436841	no
hsa-miR-6881-3p	17_50990450_50998617	circRNA	ENSG00000008294	SPAG9	sperm associated antigen 9 [Source:HGNC Symbol;Acc:HGNC:14524]	-0.501582	0.0402329	0.143005	no
hsa-miR-6862-5p	7_139371387_139398697	circRNA	ENSG00000146963	LUC7L2	LUC7 like 2, pre-mRNA splicing factor [Source:HGNC Symbol;Acc:HGNC:21608]	-0.54031	0.0251492	0.120987	no
hsa-miR-6862-5p	6_90206569_90271941	circRNA	ENSG00000112182	BACH2	BTB domain and CNC homolog 2 [Source:HGNC Symbol;Acc:HGNC:14078]	-0.701722	0.00169177	0.0538894	no
hsa-miR-363-5p	15_25393746_25415842	circRNA	ENSG00000114062	UBE3A	ubiquitin protein ligase E3A [Source:HGNC Symbol;Acc:HGNC:12496]	-0.560837	0.0191773	0.110269	no
hsa-miR-6782-3p	7_92457552_92492286	circRNA				-0.503092	0.0395398	0.141902	no
hsa-miR-199a-5p	2_28935521_28941574	circRNA	ENSG00000163811	WDR43	WD repeat domain 43 [Source:HGNC Symbol;Acc:HGNC:28945]	-0.567482	0.0175034	0.106378	no
hsa-miR-6855-5p	8_89724629_89725641	circRNA				-0.571427	0.0165651	0.104361	no
hsa-miR-6749-3p	7_148828740_148847305	circRNA	ENSG00000106462	EZH2	enhancer of zeste 2 polycomb repressive complex 2 subunit [Source:HGNC Symbol;Acc:HGNC:3527]	-0.538411	0.0257669	0.120987	no
hsa-miR-6780a-5p	2_233386181_233390483	circRNA	ENSG00000077044	DGKD	diacylglycerol kinase delta [Source:HGNC Symbol;Acc:HGNC:2851]	-0.774329	0.000263497	0.0335771	no
hsa-miR-363-5p	5_55649207_55664863	circRNA	ENSG00000177058	SLC38A9	solute carrier family 38 member 9 [Source:HGNC Symbol;Acc:HGNC:26907]	-0.663769	0.00366738	0.0671316	no
hsa-miR-23a-5p	1_207655190_207683957	circRNA	ENSG00000197721	CR1L	complement C3b/C4b receptor 1 like [Source:HGNC Symbol;Acc:HGNC:2335]	-0.735745	0.000761369	0.0414409	no
hsa-miR-6825-5p	1_233177802_233236980	circRNA	ENSG00000135749	PCNX2	pecanex 2 [Source:HGNC Symbol;Acc:HGNC:8736]	-0.515379	0.0342318	0.132721	no
hsa-miR-1260a	7_77396982_77404615	circRNA	ENSG00000186088	GSAP	gamma-secretase activating protein [Source:HGNC Symbol;Acc:HGNC:28042]	-0.488945	0.0464005	0.151905	no
hsa-miR-4745-3p	5_73041291_73056107	circRNA	ENSG00000157107	FCHO2	FCH domain only 2 [Source:HGNC Symbol;Acc:HGNC:25180]	-0.512255	0.0355265	0.135126	no
hsa-miR-23a-5p	22_42516011_42577098	circRNA				-0.484366	0.0488027	0.155642	no
hsa-miR-1976	15_65715478_65741784	circRNA	ENSG00000174485	DENND4A	DENN domain containing 4A [Source:HGNC Symbol;Acc:HGNC:24321]	-0.652696	0.00450744	0.0703359	no
hsa-miR-629-3p	2_171447687_171476950	circRNA	ENSG00000115827	DCAF17	DDB1 and CUL4 associated factor 17 [Source:HGNC Symbol;Acc:HGNC:25784]	-0.55466	0.0208434	0.112539	no
hsa-miR-4745-3p	7_139371387_139398697	circRNA	ENSG00000146963	LUC7L2	LUC7 like 2, pre-mRNA splicing factor [Source:HGNC Symbol;Acc:HGNC:21608]	-0.551109	0.0218507	0.114495	no
hsa-miR-6734-5p	1_65272073_65366196	circRNA	ENSG00000116675	DNAJC6	DnaJ heat shock protein family (Hsp40) member C6 [Source:HGNC Symbol;Acc:HGNC:15469]	-0.488444	0.0466591	0.152663	no
hsa-miR-92a-1-5p	7_129857511_129951320	circRNA	ENSG00000186591	UBE2H	ubiquitin conjugating enzyme E2 H [Source:HGNC Symbol;Acc:HGNC:12484]	-0.725812	0.000972564	0.0436841	no
hsa-miR-363-5p	3_136472413_136502779	circRNA	ENSG00000118007	STAG1	stromal antigen 1 [Source:HGNC Symbol;Acc:HGNC:11354]	-0.600543	0.0107992	0.0903179	no
hsa-miR-6511b-3p	13_72731281_72743602	circRNA	ENSG00000136122	BORA	bora, aurora kinase A activator [Source:HGNC Symbol;Acc:HGNC:24724]	-0.559967	0.0194054	0.110269	no
hsa-miR-4732-3p	6_36894504_36916574	circRNA	ENSG00000198663	C6orf89	chromosome 6 open reading frame 89 [Source:HGNC Symbol;Acc:HGNC:21114]	-0.544697	0.0237658	0.117484	no
hsa-miR-1343-3p	4_102714438_102734571	circRNA	ENSG00000109323	MANBA	mannosidase beta [Source:HGNC Symbol;Acc:HGNC:6831]	-0.497776	0.0420207	0.14607	no
hsa-miR-6780a-5p	6_90206569_90271941	circRNA	ENSG00000112182	BACH2	BTB domain and CNC homolog 2 [Source:HGNC Symbol;Acc:HGNC:14078]	-0.718578	0.00115508	0.0462031	no
hsa-miR-6511b-3p	17_47482992_47491192	circRNA				-0.488256	0.0467563	0.152718	no
hsa-miR-6780a-5p	9_37349357_37357459	circRNA	ENSG00000147905	ZCCHC7	zinc finger CCHC-type containing 7 [Source:HGNC Symbol;Acc:HGNC:26209]	-0.521568	0.0317737	0.129966	no
hsa-miR-125a-3p	2_112074912_112089718	circRNA	ENSG00000153214	TMEM87B	transmembrane protein 87B [Source:HGNC Symbol;Acc:HGNC:25913]	-0.730537	0.00086678	0.0431869	no
hsa-miR-1260a	3_196069455_196077122	circRNA	ENSG00000072274	TFRC	transferrin receptor [Source:HGNC Symbol;Acc:HGNC:11763]	-0.727941	0.000923647	0.0436841	no
hsa-miR-6780a-5p	17_60252381_60265474	circRNA	ENSG00000170832	USP32	ubiquitin specific peptidase 32 [Source:HGNC Symbol;Acc:HGNC:19143]	-0.487618	0.0470874	0.153138	no
hsa-miR-6855-5p	8_42459896_42472654	circRNA	ENSG00000168575	SLC20A2	solute carrier family 20 member 2 [Source:HGNC Symbol;Acc:HGNC:10947]	-0.610391	0.0092601	0.0857952	no
hsa-miR-1260a	4_102714438_102734571	circRNA	ENSG00000109323	MANBA	mannosidase beta [Source:HGNC Symbol;Acc:HGNC:6831]	-0.563808	0.0184142	0.108718	no
hsa-miR-616-3p	15_51451645_51453641	circRNA	ENSG00000104093	DMXL2	Dmx like 2 [Source:HGNC Symbol;Acc:HGNC:2938]	-0.535093	0.0268745	0.12251	no
hsa-miR-125a-3p	2_217814912_217836211	circRNA	ENSG00000079308	TNS1	tensin 1 [Source:HGNC Symbol;Acc:HGNC:11973]	-0.596167	0.011545	0.091208	no
hsa-miR-6511b-3p	14_31364189_31387375	circRNA	ENSG00000129493	HEATR5A	HEAT repeat containing 5A [Source:HGNC Symbol;Acc:HGNC:20276]	-0.615846	0.0084862	0.0837638	no
hsa-miR-1976	15_65722848_65756472	circRNA	ENSG00000174485	DENND4A	DENN domain containing 4A [Source:HGNC Symbol;Acc:HGNC:24321]	-0.610294	0.00927434	0.0857952	no
hsa-miR-6780a-5p	10_119578726_119588248	circRNA	ENSG00000151923	TIAL1	TIA1 cytotoxic granule associated RNA binding protein like 1 [Source:HGNC Symbol;Acc:HGNC:11804]	-0.542999	0.0242939	0.118956	no
hsa-miR-6882-3p	14_103386041_103428440	circRNA	ENSG00000075413	MARK3	microtubule affinity regulating kinase 3 [Source:HGNC Symbol;Acc:HGNC:6897]	-0.50142	0.0403081	0.143137	no
hsa-miR-3180-3p	17_43057052_43074521	circRNA	ENSG00000012048	BRCA1	BRCA1, DNA repair associated [Source:HGNC Symbol;Acc:HGNC:1100]	-0.537183	0.0261727	0.121654	no
hsa-miR-4745-3p	2_61498673_61533903	circRNA	ENSG00000082898	XPO1	exportin 1 [Source:HGNC Symbol;Acc:HGNC:12825]	-0.519927	0.0324121	0.130412	no
hsa-miR-6780a-5p	5_134167170_134174022	circRNA	ENSG00000272772,ENSG00000113558	AC104109.3,SKP1		-0.64436	0.00523746	0.0732728	no
hsa-miR-1226-3p	16_15611592_15623126	circRNA	ENSG00000166783	MARF1	meiosis regulator and mRNA stability factor 1 [Source:HGNC Symbol;Acc:HGNC:29562]	-0.589407	0.0127772	0.0949058	no
hsa-miR-6881-3p	14_103386041_103428440	circRNA	ENSG00000075413	MARK3	microtubule affinity regulating kinase 3 [Source:HGNC Symbol;Acc:HGNC:6897]	-0.523614	0.0309919	0.129512	no
hsa-miR-5010-3p	3_136472413_136502779	circRNA	ENSG00000118007	STAG1	stromal antigen 1 [Source:HGNC Symbol;Acc:HGNC:11354]	-0.617914	0.00820673	0.0832493	no
hsa-miR-2110	6_107744949_107772386	circRNA	ENSG00000146285	SCML4	Scm polycomb group protein like 4 [Source:HGNC Symbol;Acc:HGNC:21397]	-0.501582	0.0402329	0.143005	no
hsa-miR-6780a-5p	5_50402286_50411383	circRNA	ENSG00000170571	EMB	embigin [Source:HGNC Symbol;Acc:HGNC:30465]	-0.49908	0.0414014	0.144876	no
hsa-miR-363-5p	7_148828740_148847305	circRNA	ENSG00000106462	EZH2	enhancer of zeste 2 polycomb repressive complex 2 subunit [Source:HGNC Symbol;Acc:HGNC:3527]	-0.581586	0.0143301	0.0985413	no
hsa-miR-6780a-5p	2_85637369_85641118	circRNA	ENSG00000168883	USP39	ubiquitin specific peptidase 39 [Source:HGNC Symbol;Acc:HGNC:20071]	-0.556189	0.0204209	0.111852	no
hsa-miR-6780a-5p	6_17665239_17675770	circRNA	ENSG00000124789	NUP153	nucleoporin 153 [Source:HGNC Symbol;Acc:HGNC:8062]	-0.631421	0.00655692	0.078789	no
hsa-miR-204-5p	21_15014344_15045323	circRNA	ENSG00000180530	NRIP1	nuclear receptor interacting protein 1 [Source:HGNC Symbol;Acc:HGNC:8001]	-0.598061	0.0112174	0.0906626	no
hsa-miR-6825-5p	4_145081660_145096111	circRNA	ENSG00000164162	ANAPC10	anaphase promoting complex subunit 10 [Source:HGNC Symbol;Acc:HGNC:24077]	-0.562814	0.0186668	0.10881	no
hsa-miR-3127-5p	5_180851381_180859006	circRNA	ENSG00000196670	ZFP62	ZFP62 zinc finger protein [Source:HGNC Symbol;Acc:HGNC:23241]	-0.57449	0.0158643	0.102049	no
hsa-miR-877-5p	15_90980884_90981981	circRNA	ENSG00000198901	PRC1	protein regulator of cytokinesis 1 [Source:HGNC Symbol;Acc:HGNC:9341]	-0.558681	0.0197465	0.11127	no
hsa-miR-4685-3p	14_31364189_31387375	circRNA	ENSG00000129493	HEATR5A	HEAT repeat containing 5A [Source:HGNC Symbol;Acc:HGNC:20276]	-0.681232	0.00260401	0.059163	no
hsa-miR-6511a-3p	16_15611592_15623126	circRNA	ENSG00000166783	MARF1	meiosis regulator and mRNA stability factor 1 [Source:HGNC Symbol;Acc:HGNC:29562]	-0.498465	0.0416926	0.145374	no
hsa-miR-6780a-5p	11_16014942_16049938	circRNA	ENSG00000110693	SOX6	SRY-box 6 [Source:HGNC Symbol;Acc:HGNC:16421]	-0.690356	0.00215797	0.0566907	no
hsa-miR-6855-5p	1_235223166_235231189	circRNA	ENSG00000054267	ARID4B	AT-rich interaction domain 4B [Source:HGNC Symbol;Acc:HGNC:15550]	-0.524116	0.030802	0.129512	no
hsa-miR-6780a-5p	16_11883015_11887750	circRNA	ENSG00000103342	GSPT1	G1 to S phase transition 1 [Source:HGNC Symbol;Acc:HGNC:4621]	-0.519849	0.0324424	0.130412	no
hsa-miR-6799-3p	X_51327721_51357027	circRNA				-0.646194	0.00506925	0.0730795	no
hsa-miR-363-5p	10_86451967_86473973	circRNA	ENSG00000062650	WAPL	WAPL cohesin release factor [Source:HGNC Symbol;Acc:HGNC:23293]	-0.504908	0.0387183	0.140176	no
hsa-miR-6882-3p	2_144208603_144237339	circRNA	ENSG00000121964	GTDC1	glycosyltransferase like domain containing 1 [Source:HGNC Symbol;Acc:HGNC:20887]	-0.530733	0.0283853	0.125534	no
hsa-miR-363-5p	22_31441774_31447568	circRNA	ENSG00000184708	EIF4ENIF1	eukaryotic translation initiation factor 4E nuclear import factor 1 [Source:HGNC Symbol;Acc:HGNC:16687]	-0.581198	0.0144107	0.0987367	no
hsa-miR-4732-3p	6_107744949_107772386	circRNA	ENSG00000146285	SCML4	Scm polycomb group protein like 4 [Source:HGNC Symbol;Acc:HGNC:21397]	-0.520159	0.032321	0.130412	no
hsa-miR-3619-3p	15_65722848_65756472	circRNA	ENSG00000174485	DENND4A	DENN domain containing 4A [Source:HGNC Symbol;Acc:HGNC:24321]	-0.526961	0.0297444	0.127686	no
hsa-miR-3619-3p	7_92457552_92492286	circRNA				-0.6227	0.007588	0.0818629	no
hsa-miR-3127-5p	1_65272073_65366196	circRNA	ENSG00000116675	DNAJC6	DnaJ heat shock protein family (Hsp40) member C6 [Source:HGNC Symbol;Acc:HGNC:15469]	-0.65446	0.00436414	0.0696302	no
hsa-miR-6511b-3p	3_182947238_182964049	circRNA	ENSG00000043093	DCUN1D1	defective in cullin neddylation 1 domain containing 1 [Source:HGNC Symbol;Acc:HGNC:18184]	-0.741876	0.000651117	0.0406411	no
hsa-miR-6881-3p	6_107744949_107772386	circRNA	ENSG00000146285	SCML4	Scm polycomb group protein like 4 [Source:HGNC Symbol;Acc:HGNC:21397]	-0.546698	0.0231547	0.116585	no
hsa-miR-1260a	3_121436122_121440116	circRNA	ENSG00000051341	POLQ	DNA polymerase theta [Source:HGNC Symbol;Acc:HGNC:9186]	-0.538295	0.025805	0.120987	no
hsa-miR-6894-3p	8_140846260_140890769	circRNA	ENSG00000169398	PTK2	protein tyrosine kinase 2 [Source:HGNC Symbol;Acc:HGNC:9611]	-0.509202	0.0368273	0.137799	no
hsa-miR-629-3p	17_60252381_60265474	circRNA	ENSG00000170832	USP32	ubiquitin specific peptidase 32 [Source:HGNC Symbol;Acc:HGNC:19143]	-0.538411	0.0257669	0.120987	no
hsa-miR-6509-3p	9_85672550_85712566	circRNA	ENSG00000135049	AGTPBP1	ATP/GTP binding protein 1 [Source:HGNC Symbol;Acc:HGNC:17258]	-0.504236	0.0390208	0.140633	no
hsa-miR-210-5p	3_37806079_37808880	circRNA	ENSG00000144668	ITGA9	integrin subunit alpha 9 [Source:HGNC Symbol;Acc:HGNC:6145]	-0.567841	0.0174162	0.106256	no
hsa-miR-423-5p	7_129857511_129951320	circRNA	ENSG00000186591	UBE2H	ubiquitin conjugating enzyme E2 H [Source:HGNC Symbol;Acc:HGNC:12484]	-0.522355	0.0314713	0.129958	no
hsa-miR-6881-3p	6_36894504_36916574	circRNA	ENSG00000198663	C6orf89	chromosome 6 open reading frame 89 [Source:HGNC Symbol;Acc:HGNC:21114]	-0.717573	0.00118252	0.0462436	no
hsa-miR-423-5p	2_61498673_61533903	circRNA	ENSG00000082898	XPO1	exportin 1 [Source:HGNC Symbol;Acc:HGNC:12825]	-0.535868	0.0266126	0.121707	no
hsa-miR-6780a-5p	11_77611315_77629899	circRNA				-0.602256	0.0105178	0.0903179	no
hsa-miR-3619-3p	10_119578726_119588248	circRNA	ENSG00000151923	TIAL1	TIA1 cytotoxic granule associated RNA binding protein like 1 [Source:HGNC Symbol;Acc:HGNC:11804]	-0.670764	0.00320568	0.0641079	no
hsa-miR-363-5p	7_139371387_139398697	circRNA	ENSG00000146963	LUC7L2	LUC7 like 2, pre-mRNA splicing factor [Source:HGNC Symbol;Acc:HGNC:21608]	-0.619681	0.00797376	0.0829505	no
hsa-miR-1260a	1_95134782_95152552	circRNA	ENSG00000271092,ENSG00000152078	TMEM56-RWDD3,TMEM56		-0.75046	0.000519284	0.0394072	no
hsa-miR-6855-5p	15_65729072_65761438	circRNA	ENSG00000174485	DENND4A	DENN domain containing 4A [Source:HGNC Symbol;Acc:HGNC:24321]	-0.493835	0.0439351	0.148454	no
hsa-miR-4732-5p	3_47169169_47175828	circRNA				-0.597122	0.011379	0.0909578	no
hsa-miR-5010-5p	2_217814912_217836211	circRNA	ENSG00000079308	TNS1	tensin 1 [Source:HGNC Symbol;Acc:HGNC:11973]	-0.584987	0.0136374	0.0973124	no
hsa-miR-3180-3p	5_73041291_73056107	circRNA	ENSG00000157107	FCHO2	FCH domain only 2 [Source:HGNC Symbol;Acc:HGNC:25180]	-0.622877	0.00756587	0.0818629	no
hsa-miR-23a-5p	1_193069034_193070619	circRNA	ENSG00000116747	RO60	Ro60, Y RNA binding protein [Source:HGNC Symbol;Acc:HGNC:11313]	-0.683173	0.00250334	0.0582744	no
hsa-miR-3180-3p	1_233177802_233236980	circRNA	ENSG00000135749	PCNX2	pecanex 2 [Source:HGNC Symbol;Acc:HGNC:8736]	-0.598729	0.0111036	0.0906626	no
hsa-miR-363-5p	15_75407055_75422823	circRNA	ENSG00000169375,ENSG00000140398	SIN3A,NEIL1		-0.550634	0.0219885	0.114531	no
hsa-miR-125a-3p	1_233177802_233236980	circRNA	ENSG00000135749	PCNX2	pecanex 2 [Source:HGNC Symbol;Acc:HGNC:8736]	-0.661958	0.00379528	0.0671563	no
hsa-miR-877-5p	6_36894504_36916574	circRNA	ENSG00000198663	C6orf89	chromosome 6 open reading frame 89 [Source:HGNC Symbol;Acc:HGNC:21114]	-0.751874	0.000499862	0.0394072	no
hsa-miR-363-5p	15_43021275_43025429	circRNA	ENSG00000159459	UBR1	ubiquitin protein ligase E3 component n-recognin 1 [Source:HGNC Symbol;Acc:HGNC:16808]	-0.572483	0.0163207	0.103495	no
hsa-miR-6780a-5p	11_78103980_78121174	circRNA	ENSG00000159063	ALG8	ALG8, alpha-1,3-glucosyltransferase [Source:HGNC Symbol;Acc:HGNC:23161]	-0.562625	0.0187152	0.10881	no
hsa-miR-363-5p	1_207655190_207683957	circRNA	ENSG00000197721	CR1L	complement C3b/C4b receptor 1 like [Source:HGNC Symbol;Acc:HGNC:2335]	-0.529736	0.0287395	0.126445	no
hsa-miR-92b-3p	3_20099862_20152365	circRNA	ENSG00000114166	KAT2B	lysine acetyltransferase 2B [Source:HGNC Symbol;Acc:HGNC:8638]	-0.620395	0.00788109	0.0824394	no
hsa-miR-6511a-3p	10_96544076_96576829	circRNA	ENSG00000077147	TM9SF3	transmembrane 9 superfamily member 3 [Source:HGNC Symbol;Acc:HGNC:21529]	-0.562845	0.0186589	0.10881	no
hsa-miR-363-5p	14_90961900_90978524	circRNA	ENSG00000100784	RPS6KA5	ribosomal protein S6 kinase A5 [Source:HGNC Symbol;Acc:HGNC:10434]	-0.591814	0.0123271	0.0936876	no
hsa-miR-363-5p	2_112074912_112089718	circRNA	ENSG00000153214	TMEM87B	transmembrane protein 87B [Source:HGNC Symbol;Acc:HGNC:25913]	-0.631452	0.00655355	0.078789	no
hsa-miR-194-3p	9_123440360_123454779	circRNA	ENSG00000119522,ENSG00000148204	DENND1A,CRB2		-0.599776	0.0109271	0.0903179	no
hsa-miR-6780a-5p	10_5768213_5800705	circRNA	ENSG00000057608	GDI2	GDP dissociation inhibitor 2 [Source:HGNC Symbol;Acc:HGNC:4227]	-0.514839	0.0344531	0.132944	no
hsa-miR-6825-5p	12_89459638_89525204	circRNA	ENSG00000139323	POC1B	POC1 centriolar protein B [Source:HGNC Symbol;Acc:HGNC:30836]	-0.558081	0.0199072	0.111615	no
hsa-miR-125a-3p	9_123440360_123454779	circRNA	ENSG00000119522,ENSG00000148204	DENND1A,CRB2		-0.543403	0.0241674	0.118559	no
hsa-miR-6882-3p	7_129857511_129951320	circRNA	ENSG00000186591	UBE2H	ubiquitin conjugating enzyme E2 H [Source:HGNC Symbol;Acc:HGNC:12484]	-0.523086	0.0311923	0.129797	no
hsa-miR-363-5p	17_43057052_43074521	circRNA	ENSG00000012048	BRCA1	BRCA1, DNA repair associated [Source:HGNC Symbol;Acc:HGNC:1100]	-0.490408	0.0456519	0.151367	no
hsa-miR-6894-3p	6_17665239_17675770	circRNA	ENSG00000124789	NUP153	nucleoporin 153 [Source:HGNC Symbol;Acc:HGNC:8062]	-0.578726	0.0149336	0.100418	no
hsa-miR-1226-3p	5_55649207_55672695	circRNA	ENSG00000177058	SLC38A9	solute carrier family 38 member 9 [Source:HGNC Symbol;Acc:HGNC:26907]	-0.501859	0.0401051	0.142916	no
hsa-miR-423-5p	6_107744949_107772386	circRNA	ENSG00000146285	SCML4	Scm polycomb group protein like 4 [Source:HGNC Symbol;Acc:HGNC:21397]	-0.514852	0.0344479	0.132944	no
hsa-miR-1226-3p	16_31273365_31277049	circRNA	ENSG00000169896	ITGAM	integrin subunit alpha M [Source:HGNC Symbol;Acc:HGNC:6149]	-0.559967	0.0194054	0.110269	no
hsa-miR-4732-5p	1_185143357_185151935	circRNA	ENSG00000121486	TRMT1L	tRNA methyltransferase 1 like [Source:HGNC Symbol;Acc:HGNC:16782]	-0.735745	0.000761369	0.0414409	no
hsa-miR-23a-5p	11_85996826_86068738	circRNA	ENSG00000073921	PICALM	phosphatidylinositol binding clathrin assembly protein [Source:HGNC Symbol;Acc:HGNC:15514]	-0.710349	0.0013961	0.0477787	no
hsa-miR-4732-5p	5_171964198_171997051	circRNA	ENSG00000072803	FBXW11	F-box and WD repeat domain containing 11 [Source:HGNC Symbol;Acc:HGNC:13607]	-0.655832	0.0042552	0.0689632	no
hsa-miR-6747-3p	1_207655190_207683957	circRNA	ENSG00000197721	CR1L	complement C3b/C4b receptor 1 like [Source:HGNC Symbol;Acc:HGNC:2335]	-0.52851	0.0291802	0.127166	no
hsa-miR-92a-1-5p	3_136472413_136502779	circRNA	ENSG00000118007	STAG1	stromal antigen 1 [Source:HGNC Symbol;Acc:HGNC:11354]	-0.582118	0.0142198	0.0983783	no
hsa-miR-5100	1_65272073_65366196	circRNA	ENSG00000116675	DNAJC6	DnaJ heat shock protein family (Hsp40) member C6 [Source:HGNC Symbol;Acc:HGNC:15469]	-0.606438	0.00985525	0.0876022	no
hsa-miR-6825-5p	3_20099862_20152365	circRNA	ENSG00000114166	KAT2B	lysine acetyltransferase 2B [Source:HGNC Symbol;Acc:HGNC:8638]	-0.751256	0.000508268	0.0394072	no
hsa-miR-125a-3p	5_171964198_171997051	circRNA	ENSG00000072803	FBXW11	F-box and WD repeat domain containing 11 [Source:HGNC Symbol;Acc:HGNC:13607]	-0.723391	0.00103077	0.0436841	no
hsa-miR-6882-3p	1_207646918_207657351	circRNA	ENSG00000197721	CR1L	complement C3b/C4b receptor 1 like [Source:HGNC Symbol;Acc:HGNC:2335]	-0.665677	0.0035364	0.0665124	no
hsa-miR-6881-3p	14_90961900_90978524	circRNA	ENSG00000100784	RPS6KA5	ribosomal protein S6 kinase A5 [Source:HGNC Symbol;Acc:HGNC:10434]	-0.528121	0.0293212	0.127166	no
hsa-miR-766-3p	10_26500819_26511906	circRNA	ENSG00000077420	APBB1IP	amyloid beta precursor protein binding family B member 1 interacting protein [Source:HGNC Symbol;Acc:HGNC:17379]	-0.710076	0.00140476	0.0477787	no
hsa-miR-486-3p	2_171447687_171476950	circRNA	ENSG00000115827	DCAF17	DDB1 and CUL4 associated factor 17 [Source:HGNC Symbol;Acc:HGNC:25784]	-0.756354	0.000442272	0.0374941	no
hsa-miR-6780a-5p	12_122534664_122539754	circRNA	ENSG00000184445	KNTC1	kinetochore associated 1 [Source:HGNC Symbol;Acc:HGNC:17255]	-0.684644	0.00242913	0.05773	no
hsa-miR-636	3_136472413_136502779	circRNA	ENSG00000118007	STAG1	stromal antigen 1 [Source:HGNC Symbol;Acc:HGNC:11354]	-0.61295	0.00889027	0.0845842	no
hsa-miR-616-3p	3_136472413_136502779	circRNA	ENSG00000118007	STAG1	stromal antigen 1 [Source:HGNC Symbol;Acc:HGNC:11354]	-0.749437	0.000533712	0.0394072	no
hsa-miR-197-3p	1_65272073_65366196	circRNA	ENSG00000116675	DNAJC6	DnaJ heat shock protein family (Hsp40) member C6 [Source:HGNC Symbol;Acc:HGNC:15469]	-0.599578	0.0109602	0.0903179	no
hsa-miR-6780a-5p	17_68433468_68452992	circRNA	ENSG00000070540,ENSG00000141337	WIPI1,ARSG		-0.538851	0.0256226	0.120987	no
hsa-miR-6802-3p	10_101800242_101807901	circRNA	ENSG00000198408	OGA	O-GlcNAcase [Source:HGNC Symbol;Acc:HGNC:7056]	-0.635251	0.00614129	0.0775555	no
hsa-miR-6511b-3p	15_65722848_65756472	circRNA	ENSG00000174485	DENND4A	DENN domain containing 4A [Source:HGNC Symbol;Acc:HGNC:24321]	-0.664216	0.00363635	0.0671316	no
hsa-miR-1260a	1_207655190_207683957	circRNA	ENSG00000197721	CR1L	complement C3b/C4b receptor 1 like [Source:HGNC Symbol;Acc:HGNC:2335]	-0.55794	0.0199452	0.111615	no
hsa-miR-6894-3p	1_61111371_61163075	circRNA	ENSG00000162599	NFIA	nuclear factor I A [Source:HGNC Symbol;Acc:HGNC:7784]	-0.48793	0.0469252	0.153093	no
hsa-miR-194-3p	8_42459896_42472654	circRNA	ENSG00000168575	SLC20A2	solute carrier family 20 member 2 [Source:HGNC Symbol;Acc:HGNC:10947]	-0.626314	0.007146	0.0803192	no
hsa-miR-5010-5p	2_174915058_174952202	circRNA	ENSG00000128656	CHN1	chimerin 1 [Source:HGNC Symbol;Acc:HGNC:1943]	-0.576307	0.0154597	0.101526	no
hsa-miR-3180-3p	5_171964198_171997051	circRNA	ENSG00000072803	FBXW11	F-box and WD repeat domain containing 11 [Source:HGNC Symbol;Acc:HGNC:13607]	-0.714029	0.00128364	0.0463446	no
hsa-miR-3619-3p	1_244408712_244417752	circRNA	ENSG00000035687	ADSS	adenylosuccinate synthase [Source:HGNC Symbol;Acc:HGNC:292]	-0.505395	0.0385001	0.14009	no
hsa-miR-423-5p	13_73943981_73995053	circRNA				-0.64436	0.00523746	0.0732728	no
hsa-miR-6780a-5p	8_140846260_140890769	circRNA	ENSG00000169398	PTK2	protein tyrosine kinase 2 [Source:HGNC Symbol;Acc:HGNC:9611]	-0.570202	0.016852	0.104655	no
hsa-miR-6511a-3p	4_145081660_145096111	circRNA	ENSG00000164162	ANAPC10	anaphase promoting complex subunit 10 [Source:HGNC Symbol;Acc:HGNC:24077]	-0.55994	0.0194127	0.110269	no
hsa-miR-25-5p	15_75407055_75422823	circRNA	ENSG00000169375,ENSG00000140398	SIN3A,NEIL1		-0.510484	0.036277	0.136344	no
hsa-miR-6780a-5p	3_182947238_182964049	circRNA	ENSG00000043093	DCUN1D1	defective in cullin neddylation 1 domain containing 1 [Source:HGNC Symbol;Acc:HGNC:18184]	-0.500307	0.0408255	0.144164	no
hsa-miR-3180-3p	15_92900786_92929091	circRNA	ENSG00000173575	CHD2	chromodomain helicase DNA binding protein 2 [Source:HGNC Symbol;Acc:HGNC:1917]	-0.655779	0.00425935	0.0689632	no
hsa-miR-6881-3p	3_136472413_136502779	circRNA	ENSG00000118007	STAG1	stromal antigen 1 [Source:HGNC Symbol;Acc:HGNC:11354]	-0.570764	0.0167201	0.104477	no
hsa-miR-363-5p	3_20099862_20152365	circRNA	ENSG00000114166	KAT2B	lysine acetyltransferase 2B [Source:HGNC Symbol;Acc:HGNC:8638]	-0.62784	0.00696575	0.079769	no
hsa-miR-6511b-3p	15_65715478_65756472	circRNA	ENSG00000174485	DENND4A	DENN domain containing 4A [Source:HGNC Symbol;Acc:HGNC:24321]	-0.506144	0.0381667	0.139404	no
hsa-miR-6825-5p	1_65272073_65366196	circRNA	ENSG00000116675	DNAJC6	DnaJ heat shock protein family (Hsp40) member C6 [Source:HGNC Symbol;Acc:HGNC:15469]	-0.586226	0.0133917	0.0965368	no
hsa-miR-6793-3p	17_4296717_4331888	circRNA	ENSG00000132388	UBE2G1	ubiquitin conjugating enzyme E2 G1 [Source:HGNC Symbol;Acc:HGNC:12482]	-0.5333	0.0274881	0.123133	no
hsa-miR-363-5p	2_61498673_61502310	circRNA	ENSG00000082898	XPO1	exportin 1 [Source:HGNC Symbol;Acc:HGNC:12825]	-0.490761	0.0454727	0.151132	no
hsa-miR-3180-3p	1_65272073_65366196	circRNA	ENSG00000116675	DNAJC6	DnaJ heat shock protein family (Hsp40) member C6 [Source:HGNC Symbol;Acc:HGNC:15469]	-0.618177	0.00817163	0.0832493	no
hsa-miR-6780a-5p	6_99558497_99562948	circRNA	ENSG00000112237	CCNC	cyclin C [Source:HGNC Symbol;Acc:HGNC:1581]	-0.490408	0.0456519	0.151367	no
hsa-miR-6881-3p	8_19704761_19715024	circRNA	ENSG00000147408	CSGALNACT1	chondroitin sulfate N-acetylgalactosaminyltransferase 1 [Source:HGNC Symbol;Acc:HGNC:24290]	-0.793757	0.000142577	0.0316266	no
hsa-miR-4732-5p	1_233177802_233236980	circRNA	ENSG00000135749	PCNX2	pecanex 2 [Source:HGNC Symbol;Acc:HGNC:8736]	-0.576254	0.0154714	0.101526	no
hsa-miR-1538	13_113585774_113640375	circRNA	ENSG00000198176	TFDP1	transcription factor Dp-1 [Source:HGNC Symbol;Acc:HGNC:11749]	-0.615699	0.00850636	0.0837638	no
hsa-miR-6511b-3p	7_156734177_156826744	circRNA	ENSG00000105983	LMBR1	limb development membrane protein 1 [Source:HGNC Symbol;Acc:HGNC:13243]	-0.525322	0.0303503	0.128266	no
hsa-miR-616-3p	21_15014344_15045323	circRNA	ENSG00000180530	NRIP1	nuclear receptor interacting protein 1 [Source:HGNC Symbol;Acc:HGNC:8001]	-0.5	0.040969	0.144357	no
hsa-miR-3127-5p	15_67226901_67236820	circRNA	ENSG00000103591	AAGAB	alpha and gamma adaptin binding protein [Source:HGNC Symbol;Acc:HGNC:25662]	-0.553502	0.0211679	0.11306	no
hsa-miR-6825-5p	2_174915058_174952202	circRNA	ENSG00000128656	CHN1	chimerin 1 [Source:HGNC Symbol;Acc:HGNC:1943]	-0.560162	0.0193542	0.110269	no
hsa-miR-6780a-5p	7_23694891_23702196	circRNA	ENSG00000188732	FAM221A	family with sequence similarity 221 member A [Source:HGNC Symbol;Acc:HGNC:27977]	-0.62222	0.00764825	0.0819661	no
hsa-miR-197-3p	3_170113360_170117476	circRNA	ENSG00000173889	PHC3	polyhomeotic homolog 3 [Source:HGNC Symbol;Acc:HGNC:15682]	-0.666122	0.00350637	0.0661666	no
hsa-miR-6727-3p	7_139371387_139398697	circRNA	ENSG00000146963	LUC7L2	LUC7 like 2, pre-mRNA splicing factor [Source:HGNC Symbol;Acc:HGNC:21608]	-0.569813	0.0169441	0.104954	no
hsa-miR-6894-3p	15_65729072_65761438	circRNA	ENSG00000174485	DENND4A	DENN domain containing 4A [Source:HGNC Symbol;Acc:HGNC:24321]	-0.494137	0.0437857	0.148454	no
hsa-miR-3180-3p	6_98899268_98934879	circRNA	ENSG00000112234	FBXL4	F-box and leucine rich repeat protein 4 [Source:HGNC Symbol;Acc:HGNC:13601]	-0.623116	0.00753607	0.0818629	no
hsa-miR-6780a-5p	1_65272073_65366196	circRNA	ENSG00000116675	DNAJC6	DnaJ heat shock protein family (Hsp40) member C6 [Source:HGNC Symbol;Acc:HGNC:15469]	-0.735409	0.000767824	0.0414409	no
hsa-miR-1538	16_15611592_15623126	circRNA	ENSG00000166783	MARF1	meiosis regulator and mRNA stability factor 1 [Source:HGNC Symbol;Acc:HGNC:29562]	-0.596805	0.0114338	0.0909578	no
hsa-miR-224-5p	11_85996826_86068738	circRNA	ENSG00000073921	PICALM	phosphatidylinositol binding clathrin assembly protein [Source:HGNC Symbol;Acc:HGNC:15514]	-0.483917	0.0490428	0.156161	no
hsa-miR-5010-3p	7_100328836_100332576	circRNA				-0.489093	0.0463245	0.151831	no
hsa-miR-6780a-5p	14_102376650_102414793	circRNA	ENSG00000196663	TECPR2	tectonin beta-propeller repeat containing 2 [Source:HGNC Symbol;Acc:HGNC:19957]	-0.565275	0.0180461	0.107444	no
hsa-let-7d-3p	20_41533050_41551360	circRNA	ENSG00000124177	CHD6	chromodomain helicase DNA binding protein 6 [Source:HGNC Symbol;Acc:HGNC:19057]	-0.511058	0.0360323	0.136079	no
hsa-miR-3180-3p	16_15611592_15623126	circRNA	ENSG00000166783	MARF1	meiosis regulator and mRNA stability factor 1 [Source:HGNC Symbol;Acc:HGNC:29562]	-0.591772	0.0123349	0.0936876	no
hsa-miR-6734-5p	11_116762553_116765446	circRNA	ENSG00000137656	BUD13	BUD13 homolog [Source:HGNC Symbol;Acc:HGNC:28199]	-0.668323	0.00336103	0.0650885	no
hsa-miR-224-5p	16_31273365_31277049	circRNA	ENSG00000169896	ITGAM	integrin subunit alpha M [Source:HGNC Symbol;Acc:HGNC:6149]	-0.634276	0.00624505	0.0779102	no
hsa-miR-6511b-3p	15_65715478_65741784	circRNA	ENSG00000174485	DENND4A	DENN domain containing 4A [Source:HGNC Symbol;Acc:HGNC:24321]	-0.746664	0.000574533	0.0394072	no
hsa-miR-664b-3p	11_85996826_86068738	circRNA	ENSG00000073921	PICALM	phosphatidylinositol binding clathrin assembly protein [Source:HGNC Symbol;Acc:HGNC:15514]	-0.74399	0.000616323	0.0402381	no
hsa-miR-125a-3p	3_142355401_142371328	circRNA	ENSG00000114127	XRN1	5'-3' exoribonuclease 1 [Source:HGNC Symbol;Acc:HGNC:30654]	-0.580536	0.0145494	0.0992083	no
hsa-miR-4433b-5p	7_142463288_142482603	circRNA				-0.538411	0.0257669	0.120987	no
hsa-miR-6509-3p	14_91797785_91813825	circRNA	ENSG00000165929	TC2N	tandem C2 domains, nuclear [Source:HGNC Symbol;Acc:HGNC:19859]	-0.589974	0.01267	0.0945672	no
hsa-miR-1976	13_73943981_73995053	circRNA				-0.561551	0.0189918	0.109963	no
hsa-miR-194-3p	17_43057052_43074521	circRNA	ENSG00000012048	BRCA1	BRCA1, DNA repair associated [Source:HGNC Symbol;Acc:HGNC:1100]	-0.576445	0.0154293	0.101526	no
hsa-miR-423-5p	10_101800242_101807901	circRNA	ENSG00000198408	OGA	O-GlcNAcase [Source:HGNC Symbol;Acc:HGNC:7056]	-0.676412	0.0028684	0.0598989	no
hsa-miR-6855-5p	4_88107184_88113553	circRNA	ENSG00000118777	ABCG2	ATP binding cassette subfamily G member 2 (Junior blood group) [Source:HGNC Symbol;Acc:HGNC:74]	-0.639963	0.00565932	0.0747556	no
hsa-miR-6734-5p	4_39300021_39303151	circRNA	ENSG00000035928	RFC1	replication factor C subunit 1 [Source:HGNC Symbol;Acc:HGNC:9969]	-0.505558	0.0384273	0.139915	no
hsa-miR-125a-3p	3_182947238_182964049	circRNA	ENSG00000043093	DCUN1D1	defective in cullin neddylation 1 domain containing 1 [Source:HGNC Symbol;Acc:HGNC:18184]	-0.67737	0.00281418	0.0598154	no
hsa-miR-3127-5p	12_801904_813814	circRNA	ENSG00000060237	WNK1	WNK lysine deficient protein kinase 1 [Source:HGNC Symbol;Acc:HGNC:14540]	-0.501279	0.040373	0.143137	no
hsa-miR-328-3p	19_10163326_10179982	circRNA	ENSG00000130816	DNMT1	DNA methyltransferase 1 [Source:HGNC Symbol;Acc:HGNC:2976]	-0.617141	0.00831027	0.0832493	no
hsa-miR-125a-3p	2_27677295_27682359	circRNA	ENSG00000163798	SLC4A1AP	solute carrier family 4 member 1 adaptor protein [Source:HGNC Symbol;Acc:HGNC:13813]	-0.615679	0.0085091	0.0837638	no
hsa-miR-224-5p	10_73467553_73479517	circRNA	ENSG00000107758	PPP3CB	protein phosphatase 3 catalytic subunit beta [Source:HGNC Symbol;Acc:HGNC:9315]	-0.511081	0.0360226	0.136079	no
hsa-miR-1226-3p	11_16014942_16049938	circRNA	ENSG00000110693	SOX6	SRY-box 6 [Source:HGNC Symbol;Acc:HGNC:16421]	-0.570228	0.0168461	0.104655	no
hsa-miR-3180-3p	7_92457552_92492286	circRNA				-0.578039	0.0150816	0.100662	no
hsa-miR-6894-3p	6_98899268_98934879	circRNA	ENSG00000112234	FBXL4	F-box and leucine rich repeat protein 4 [Source:HGNC Symbol;Acc:HGNC:13601]	-0.52021	0.0323012	0.130412	no
hsa-miR-6780a-5p	15_25393746_25415842	circRNA	ENSG00000114062	UBE3A	ubiquitin protein ligase E3A [Source:HGNC Symbol;Acc:HGNC:12496]	-0.665064	0.00357807	0.0666342	no
hsa-miR-328-3p	13_113585774_113640375	circRNA	ENSG00000198176	TFDP1	transcription factor Dp-1 [Source:HGNC Symbol;Acc:HGNC:11749]	-0.559967	0.0194054	0.110269	no
hsa-miR-877-5p	2_233386181_233390483	circRNA	ENSG00000077044	DGKD	diacylglycerol kinase delta [Source:HGNC Symbol;Acc:HGNC:2851]	-0.550634	0.0219885	0.114531	no
hsa-miR-6734-5p	2_23798138_23834078	circRNA	ENSG00000119778	ATAD2B	ATPase family, AAA domain containing 2B [Source:HGNC Symbol;Acc:HGNC:29230]	-0.678188	0.00276855	0.0598154	no
hsa-miR-6802-3p	13_113585774_113640375	circRNA	ENSG00000198176	TFDP1	transcription factor Dp-1 [Source:HGNC Symbol;Acc:HGNC:11749]	-0.520159	0.032321	0.130412	no
hsa-miR-3127-5p	6_90206569_90271941	circRNA	ENSG00000112182	BACH2	BTB domain and CNC homolog 2 [Source:HGNC Symbol;Acc:HGNC:14078]	-0.565297	0.0180405	0.107444	no
hsa-miR-6734-5p	2_11455342_11457233	circRNA	ENSG00000169016	E2F6	E2F transcription factor 6 [Source:HGNC Symbol;Acc:HGNC:3120]	-0.675178	0.00293951	0.060223	no
hsa-miR-6780a-5p	1_212006639_212021212	circRNA	ENSG00000143493	INTS7	integrator complex subunit 7 [Source:HGNC Symbol;Acc:HGNC:24484]	-0.61295	0.00889027	0.0845842	no
hsa-miR-5010-5p	7_129857511_129951320	circRNA	ENSG00000186591	UBE2H	ubiquitin conjugating enzyme E2 H [Source:HGNC Symbol;Acc:HGNC:12484]	-0.650125	0.00472325	0.0707906	no
hsa-miR-92b-3p	5_55649207_55664863	circRNA	ENSG00000177058	SLC38A9	solute carrier family 38 member 9 [Source:HGNC Symbol;Acc:HGNC:26907]	-0.569314	0.0170625	0.105457	no
hsa-miR-3180-3p	4_102714438_102734571	circRNA	ENSG00000109323	MANBA	mannosidase beta [Source:HGNC Symbol;Acc:HGNC:6831]	-0.719987	0.00111747	0.0456634	no
hsa-miR-194-3p	6_90206569_90271941	circRNA	ENSG00000112182	BACH2	BTB domain and CNC homolog 2 [Source:HGNC Symbol;Acc:HGNC:14078]	-0.62661	0.00711082	0.0803192	no
hsa-miR-6882-3p	7_148828740_148847305	circRNA	ENSG00000106462	EZH2	enhancer of zeste 2 polycomb repressive complex 2 subunit [Source:HGNC Symbol;Acc:HGNC:3527]	-0.602632	0.0104569	0.0903179	no
hsa-miR-6799-3p	8_100268785_100288267	circRNA	ENSG00000034677,ENSG00000104450	RNF19A,SPAG1		-0.54857	0.0225943	0.115826	no
hsa-miR-3180-3p	12_801904_813814	circRNA	ENSG00000060237	WNK1	WNK lysine deficient protein kinase 1 [Source:HGNC Symbol;Acc:HGNC:14540]	-0.620603	0.00785429	0.0824394	no
hsa-miR-766-3p	12_89459638_89525204	circRNA	ENSG00000139323	POC1B	POC1 centriolar protein B [Source:HGNC Symbol;Acc:HGNC:30836]	-0.59131	0.0124202	0.0936876	no
hsa-miR-6882-3p	4_102714438_102734571	circRNA	ENSG00000109323	MANBA	mannosidase beta [Source:HGNC Symbol;Acc:HGNC:6831]	-0.539474	0.0254197	0.120987	no
hsa-miR-6749-3p	1_207646918_207657351	circRNA	ENSG00000197721	CR1L	complement C3b/C4b receptor 1 like [Source:HGNC Symbol;Acc:HGNC:2335]	-0.625166	0.00728412	0.0811251	no
hsa-miR-363-5p	8_124495472_124516030	circRNA	ENSG00000147687	TATDN1	TatD DNase domain containing 1 [Source:HGNC Symbol;Acc:HGNC:24220]	-0.515486	0.0341882	0.132643	no
hsa-miR-1976	20_62854016_62860308	circRNA	ENSG00000101190	TCFL5	transcription factor like 5 [Source:HGNC Symbol;Acc:HGNC:11646]	-0.700623	0.00173288	0.0539317	no
hsa-miR-210-5p	15_67226901_67236820	circRNA	ENSG00000103591	AAGAB	alpha and gamma adaptin binding protein [Source:HGNC Symbol;Acc:HGNC:25662]	-0.668217	0.00336793	0.0650885	no
hsa-miR-3180-3p	8_140846260_140890769	circRNA	ENSG00000169398	PTK2	protein tyrosine kinase 2 [Source:HGNC Symbol;Acc:HGNC:9611]	-0.650573	0.00468506	0.0707906	no
hsa-miR-6734-5p	12_89459638_89525204	circRNA	ENSG00000139323	POC1B	POC1 centriolar protein B [Source:HGNC Symbol;Acc:HGNC:30836]	-0.494268	0.0437213	0.148454	no
hsa-miR-6780a-5p	7_142463288_142482603	circRNA				-0.573967	0.0159823	0.102576	no
hsa-miR-423-5p	4_145081660_145096111	circRNA	ENSG00000164162	ANAPC10	anaphase promoting complex subunit 10 [Source:HGNC Symbol;Acc:HGNC:24077]	-0.555874	0.0205073	0.111981	no
hsa-miR-2110	14_31364189_31387375	circRNA	ENSG00000129493	HEATR5A	HEAT repeat containing 5A [Source:HGNC Symbol;Acc:HGNC:20276]	-0.641696	0.00548988	0.0740678	no
hsa-miR-6747-3p	X_51327721_51357027	circRNA				-0.552827	0.0213587	0.113381	no
hsa-miR-363-5p	2_23798138_23834078	circRNA	ENSG00000119778	ATAD2B	ATPase family, AAA domain containing 2B [Source:HGNC Symbol;Acc:HGNC:29230]	-0.575843	0.0155621	0.101536	no
hsa-miR-629-3p	2_217814912_217836211	circRNA	ENSG00000079308	TNS1	tensin 1 [Source:HGNC Symbol;Acc:HGNC:11973]	-0.514839	0.0344531	0.132944	no
hsa-miR-6780a-5p	6_35874233_35886811	circRNA	ENSG00000096063,ENSG00000197753	SRPK1,LHFPL5		-0.536021	0.0265609	0.121707	no
hsa-miR-6780a-5p	9_336582_340321	circRNA	ENSG00000227155,ENSG00000107099	AL161725.1,DOCK8		-0.716188	0.00122122	0.0462436	no
hsa-miR-363-5p	5_180851381_180859006	circRNA	ENSG00000196670	ZFP62	ZFP62 zinc finger protein [Source:HGNC Symbol;Acc:HGNC:23241]	-0.715525	0.00124014	0.0463446	no
hsa-miR-1260a	17_4296717_4331888	circRNA	ENSG00000132388	UBE2G1	ubiquitin conjugating enzyme E2 G1 [Source:HGNC Symbol;Acc:HGNC:12482]	-0.507883	0.0374008	0.138296	no
hsa-miR-6780a-5p	2_23857415_23869761	circRNA	ENSG00000119778	ATAD2B	ATPase family, AAA domain containing 2B [Source:HGNC Symbol;Acc:HGNC:29230]	-0.591744	0.01234	0.0936876	no
hsa-miR-3180-3p	10_68355353_68364113	circRNA	ENSG00000204130	RUFY2	RUN and FYVE domain containing 2 [Source:HGNC Symbol;Acc:HGNC:19761]	-0.653266	0.00446071	0.0703282	no
hsa-miR-125a-3p	22_31441774_31447568	circRNA	ENSG00000184708	EIF4ENIF1	eukaryotic translation initiation factor 4E nuclear import factor 1 [Source:HGNC Symbol;Acc:HGNC:16687]	-0.506019	0.0382221	0.139404	no
hsa-miR-6862-5p	15_25393746_25415842	circRNA	ENSG00000114062	UBE3A	ubiquitin protein ligase E3A [Source:HGNC Symbol;Acc:HGNC:12496]	-0.614414	0.00868421	0.0845842	no
hsa-miR-363-5p	19_10163326_10179982	circRNA	ENSG00000130816	DNMT1	DNA methyltransferase 1 [Source:HGNC Symbol;Acc:HGNC:2976]	-0.690792	0.00213833	0.0566907	no
hsa-miR-6780a-5p	16_74942738_74956610	circRNA	ENSG00000103091	WDR59	WD repeat domain 59 [Source:HGNC Symbol;Acc:HGNC:25706]	-0.546698	0.0231547	0.116585	no
hsa-miR-6780a-5p	16_8905187_8917156	circRNA	ENSG00000187555	USP7	ubiquitin specific peptidase 7 [Source:HGNC Symbol;Acc:HGNC:12630]	-0.540773	0.0250003	0.120443	no
hsa-miR-6780a-5p	7_148828740_148847305	circRNA	ENSG00000106462	EZH2	enhancer of zeste 2 polycomb repressive complex 2 subunit [Source:HGNC Symbol;Acc:HGNC:3527]	-0.733966	0.000796107	0.0414852	no
hsa-miR-3180	7_92457552_92492286	circRNA				-0.578039	0.0150816	0.100662	no
hsa-miR-766-3p	13_113585774_113640375	circRNA	ENSG00000198176	TFDP1	transcription factor Dp-1 [Source:HGNC Symbol;Acc:HGNC:11749]	-0.538736	0.0256602	0.120987	no
hsa-miR-1229-3p	1_53860056_53878722	circRNA	ENSG00000058799	YIPF1	Yip1 domain family member 1 [Source:HGNC Symbol;Acc:HGNC:25231]	-0.504236	0.0390208	0.140633	no
hsa-miR-636	19_10163326_10179982	circRNA	ENSG00000130816	DNMT1	DNA methyltransferase 1 [Source:HGNC Symbol;Acc:HGNC:2976]	-0.553649	0.0211264	0.11306	no
hsa-miR-196b-5p	10_45626571_45639963	circRNA	ENSG00000172671	ZFAND4	zinc finger AN1-type containing 4 [Source:HGNC Symbol;Acc:HGNC:23504]	-0.487391	0.0472055	0.153227	no
hsa-miR-194-3p	14_103386041_103428440	circRNA	ENSG00000075413	MARK3	microtubule affinity regulating kinase 3 [Source:HGNC Symbol;Acc:HGNC:6897]	-0.493835	0.0439351	0.148454	no
hsa-miR-6780a-5p	14_52439204_52457174	circRNA	ENSG00000087301	TXNDC16	thioredoxin domain containing 16 [Source:HGNC Symbol;Acc:HGNC:19965]	-0.621928	0.00768513	0.0820518	no
hsa-miR-6780a-5p	2_144208603_144237339	circRNA	ENSG00000121964	GTDC1	glycosyltransferase like domain containing 1 [Source:HGNC Symbol;Acc:HGNC:20887]	-0.559967	0.0194054	0.110269	no
22_28029	2_45546317_45562756	circRNA	ENSG00000068784	SRBD1	S1 RNA binding domain 1 [Source:HGNC Symbol;Acc:HGNC:25521]	-0.585768	0.0134823	0.0967742	no
1_1081	1_233177802_233236980	circRNA	ENSG00000135749	PCNX2	pecanex 2 [Source:HGNC Symbol;Acc:HGNC:8736]	-0.687388	0.00229557	0.0566907	no
22_28029	3_196069455_196077122	circRNA	ENSG00000072274	TFRC	transferrin receptor [Source:HGNC Symbol;Acc:HGNC:11763]	-0.631622	0.00653459	0.078789	no
22_28029	9_37349357_37357459	circRNA	ENSG00000147905	ZCCHC7	zinc finger CCHC-type containing 7 [Source:HGNC Symbol;Acc:HGNC:26209]	-0.559804	0.0194484	0.110269	no
15_20525	17_48133535_48137337	circRNA	ENSG00000141293	SKAP1	src kinase associated phosphoprotein 1 [Source:HGNC Symbol;Acc:HGNC:15605]	-0.538411	0.0257669	0.120987	no
1_1085	1_233177802_233236980	circRNA	ENSG00000135749	PCNX2	pecanex 2 [Source:HGNC Symbol;Acc:HGNC:8736]	-0.687388	0.00229557	0.0566907	no
19_24991	X_41183998_41189475	circRNA	ENSG00000124486	USP9X	ubiquitin specific peptidase 9 X-linked [Source:HGNC Symbol;Acc:HGNC:12632]	-0.668217	0.00336793	0.0650885	no
15_20525	22_42516011_42577098	circRNA				-0.621705	0.00771348	0.0820705	no
15_20525	2_36877891_36894033	circRNA	ENSG00000115808	STRN	striatin [Source:HGNC Symbol;Acc:HGNC:11424]	-0.539209	0.0255059	0.120987	no
2_4210	11_16014942_16049938	circRNA	ENSG00000110693	SOX6	SRY-box 6 [Source:HGNC Symbol;Acc:HGNC:16421]	-0.565666	0.0179491	0.107316	no
22_28029	3_43299754_43309942	circRNA	ENSG00000163788	SNRK	SNF related kinase [Source:HGNC Symbol;Acc:HGNC:30598]	-0.505984	0.0382379	0.139404	no
22_28029	19_10163326_10179982	circRNA	ENSG00000130816	DNMT1	DNA methyltransferase 1 [Source:HGNC Symbol;Acc:HGNC:2976]	-0.536233	0.02649	0.121707	no
2_4210	13_113585774_113640375	circRNA	ENSG00000198176	TFDP1	transcription factor Dp-1 [Source:HGNC Symbol;Acc:HGNC:11749]	-0.496274	0.0427425	0.146887	no
22_28029	2_217814912_217836211	circRNA	ENSG00000079308	TNS1	tensin 1 [Source:HGNC Symbol;Acc:HGNC:11973]	-0.636125	0.00604945	0.0773894	no
1_1079	1_233177802_233236980	circRNA	ENSG00000135749	PCNX2	pecanex 2 [Source:HGNC Symbol;Acc:HGNC:8736]	-0.687388	0.00229557	0.0566907	no
22_28029	5_55645789_55664863	circRNA	ENSG00000177058	SLC38A9	solute carrier family 38 member 9 [Source:HGNC Symbol;Acc:HGNC:26907]	-0.564272	0.0182972	0.108598	no
1_1081	10_73467553_73479517	circRNA	ENSG00000107758	PPP3CB	protein phosphatase 3 catalytic subunit beta [Source:HGNC Symbol;Acc:HGNC:9315]	-0.787916	0.00017261	0.0316266	no
15_20525	16_15611592_15623126	circRNA	ENSG00000166783	MARF1	meiosis regulator and mRNA stability factor 1 [Source:HGNC Symbol;Acc:HGNC:29562]	-0.63873	0.0057824	0.0756775	no
1_1083	10_73467553_73479517	circRNA	ENSG00000107758	PPP3CB	protein phosphatase 3 catalytic subunit beta [Source:HGNC Symbol;Acc:HGNC:9315]	-0.787916	0.00017261	0.0316266	no
15_20525	2_174915058_174952202	circRNA	ENSG00000128656	CHN1	chimerin 1 [Source:HGNC Symbol;Acc:HGNC:1943]	-0.50715	0.0377221	0.138412	no
19_24991	3_182947238_182964049	circRNA	ENSG00000043093	DCUN1D1	defective in cullin neddylation 1 domain containing 1 [Source:HGNC Symbol;Acc:HGNC:18184]	-0.58737	0.0131682	0.0959841	no
15_20525	7_92457552_92492286	circRNA				-0.510491	0.036274	0.136344	no
19_24991	8_124495472_124516030	circRNA	ENSG00000147687	TATDN1	TatD DNase domain containing 1 [Source:HGNC Symbol;Acc:HGNC:24220]	-0.50028	0.0408381	0.144164	no
22_28029	7_129857511_129951320	circRNA	ENSG00000186591	UBE2H	ubiquitin conjugating enzyme E2 H [Source:HGNC Symbol;Acc:HGNC:12484]	-0.637482	0.00590916	0.0766612	no
19_24991	2_171447687_171476950	circRNA	ENSG00000115827	DCAF17	DDB1 and CUL4 associated factor 17 [Source:HGNC Symbol;Acc:HGNC:25784]	-0.62366	0.00746846	0.0818629	no
19_24991	9_75077159_75080941	circRNA	ENSG00000106733	NMRK1	nicotinamide riboside kinase 1 [Source:HGNC Symbol;Acc:HGNC:26057]	-0.483908	0.0490476	0.156161	no
2_4210	13_73943981_73995053	circRNA				-0.508501	0.0371312	0.138027	no
21_27366	10_73467553_73479517	circRNA	ENSG00000107758	PPP3CB	protein phosphatase 3 catalytic subunit beta [Source:HGNC Symbol;Acc:HGNC:9315]	-0.787916	0.00017261	0.0316266	no
1_1083	1_233177802_233236980	circRNA	ENSG00000135749	PCNX2	pecanex 2 [Source:HGNC Symbol;Acc:HGNC:8736]	-0.687388	0.00229557	0.0566907	no
15_20525	1_207646918_207657351	circRNA	ENSG00000197721	CR1L	complement C3b/C4b receptor 1 like [Source:HGNC Symbol;Acc:HGNC:2335]	-0.57461	0.0158372	0.102049	no
19_24991	11_16014942_16049938	circRNA	ENSG00000110693	SOX6	SRY-box 6 [Source:HGNC Symbol;Acc:HGNC:16421]	-0.515486	0.0341882	0.132643	no
22_28029	2_23875829_23888399	circRNA	ENSG00000119778	ATAD2B	ATPase family, AAA domain containing 2B [Source:HGNC Symbol;Acc:HGNC:29230]	-0.494984	0.0433702	0.147776	no
15_20525	6_90206569_90271941	circRNA	ENSG00000112182	BACH2	BTB domain and CNC homolog 2 [Source:HGNC Symbol;Acc:HGNC:14078]	-0.647456	0.00495601	0.0723654	no
15_20525	10_5959754_5966339	circRNA	ENSG00000134470	IL15RA	interleukin 15 receptor subunit alpha [Source:HGNC Symbol;Acc:HGNC:5978]	-0.57351	0.016086	0.102886	no
15_20525	1_185143357_185151935	circRNA	ENSG00000121486	TRMT1L	tRNA methyltransferase 1 like [Source:HGNC Symbol;Acc:HGNC:16782]	-0.669528	0.0032836	0.0647598	no
X_28928	13_113585774_113640375	circRNA	ENSG00000198176	TFDP1	transcription factor Dp-1 [Source:HGNC Symbol;Acc:HGNC:11749]	-0.598144	0.0112031	0.0906626	no
19_24991	1_207655190_207683957	circRNA	ENSG00000197721	CR1L	complement C3b/C4b receptor 1 like [Source:HGNC Symbol;Acc:HGNC:2335]	-0.533415	0.0274483	0.123051	no
22_28029	5_55649207_55664863	circRNA	ENSG00000177058	SLC38A9	solute carrier family 38 member 9 [Source:HGNC Symbol;Acc:HGNC:26907]	-0.680889	0.00262215	0.059338	no
15_20525	1_207652547_207657351	circRNA	ENSG00000197721	CR1L	complement C3b/C4b receptor 1 like [Source:HGNC Symbol;Acc:HGNC:2335]	-0.675554	0.00291771	0.0600457	no
2_4210	1_95134782_95152552	circRNA	ENSG00000271092,ENSG00000152078	TMEM56-RWDD3,TMEM56		-0.763399	0.000362938	0.0343582	no
2_4210	6_24830509_24832391	circRNA	ENSG00000111913	RIPOR2	RHO family interacting cell polarization regulator 2 [Source:HGNC Symbol;Acc:HGNC:13872]	-0.50028	0.0408381	0.144164	no
17_23382	2_68217092_68234659	circRNA	ENSG00000221823	PPP3R1	protein phosphatase 3 regulatory subunit B, alpha [Source:HGNC Symbol;Acc:HGNC:9317]	-0.554242	0.0209601	0.11264	no
15_20525	4_88938088_88991150	circRNA	ENSG00000138640	FAM13A	family with sequence similarity 13 member A [Source:HGNC Symbol;Acc:HGNC:19367]	-0.540773	0.0250003	0.120443	no
19_24991	1_207646918_207657351	circRNA	ENSG00000197721	CR1L	complement C3b/C4b receptor 1 like [Source:HGNC Symbol;Acc:HGNC:2335]	-0.568445	0.0172706	0.106256	no
22_28029	3_149068240_149073322	circRNA	ENSG00000071794	HLTF	helicase like transcription factor [Source:HGNC Symbol;Acc:HGNC:11099]	-0.559001	0.0196612	0.1109	no
1_1085	10_73467553_73479517	circRNA	ENSG00000107758	PPP3CB	protein phosphatase 3 catalytic subunit beta [Source:HGNC Symbol;Acc:HGNC:9315]	-0.787916	0.00017261	0.0316266	no
1_1079	10_73467553_73479517	circRNA	ENSG00000107758	PPP3CB	protein phosphatase 3 catalytic subunit beta [Source:HGNC Symbol;Acc:HGNC:9315]	-0.787916	0.00017261	0.0316266	no
17_23382	X_51327721_51357027	circRNA				-0.509975	0.0364945	0.136824	no
19_24991	10_26500819_26511906	circRNA	ENSG00000077420	APBB1IP	amyloid beta precursor protein binding family B member 1 interacting protein [Source:HGNC Symbol;Acc:HGNC:17379]	-0.545456	0.0235325	0.117044	no
19_24991	2_23798138_23834078	circRNA	ENSG00000119778	ATAD2B	ATPase family, AAA domain containing 2B [Source:HGNC Symbol;Acc:HGNC:29230]	-0.540084	0.0252219	0.120987	no
15_20525	4_39300021_39303151	circRNA	ENSG00000035928	RFC1	replication factor C subunit 1 [Source:HGNC Symbol;Acc:HGNC:9969]	-0.540084	0.0252219	0.120987	no
19_24991	13_113585774_113640375	circRNA	ENSG00000198176	TFDP1	transcription factor Dp-1 [Source:HGNC Symbol;Acc:HGNC:11749]	-0.621007	0.00780247	0.0820705	no
19_24991	10_96544076_96576829	circRNA	ENSG00000077147	TM9SF3	transmembrane 9 superfamily member 3 [Source:HGNC Symbol;Acc:HGNC:21529]	-0.512255	0.0355265	0.135126	no
15_20525	1_207655190_207683957	circRNA	ENSG00000197721	CR1L	complement C3b/C4b receptor 1 like [Source:HGNC Symbol;Acc:HGNC:2335]	-0.624157	0.00740724	0.0818543	no
21_27366	1_233177802_233236980	circRNA	ENSG00000135749	PCNX2	pecanex 2 [Source:HGNC Symbol;Acc:HGNC:8736]	-0.687388	0.00229557	0.0566907	no
19_24991	1_207652547_207657351	circRNA	ENSG00000197721	CR1L	complement C3b/C4b receptor 1 like [Source:HGNC Symbol;Acc:HGNC:2335]	-0.563808	0.0184142	0.108718	no
hsa-miR-328-3p	ENST00000615189	mRNA	ENSG00000100003	SEC14L2	SEC14 like lipid binding 2 [Source:HGNC Symbol;Acc:HGNC:10699]	-0.613216	0.0088526	0.0845842	no
hsa-miR-766-3p	ENST00000399696	mRNA	ENSG00000186184	POLR1D	RNA polymerase I and III subunit D [Source:HGNC Symbol;Acc:HGNC:20422]	-0.585537	0.0135279	0.0967742	no
hsa-miR-6855-5p	ENST00000520958	mRNA	ENSG00000081059	TCF7	transcription factor 7 [Source:HGNC Symbol;Acc:HGNC:11639]	-0.707542	0.00148723	0.0496911	no
hsa-miR-3127-5p	ENST00000357043	mRNA	ENSG00000068028	RASSF1	Ras association domain family member 1 [Source:HGNC Symbol;Acc:HGNC:9882]	-0.575391	0.0156626	0.101809	no
hsa-miR-6799-3p	ENST00000556626	mRNA	ENSG00000070182	SPTB	spectrin beta, erythrocytic [Source:HGNC Symbol;Acc:HGNC:11274]	-0.539845	0.0252994	0.120987	no
hsa-miR-766-3p	ENST00000556626	mRNA	ENSG00000070182	SPTB	spectrin beta, erythrocytic [Source:HGNC Symbol;Acc:HGNC:11274]	-0.567482	0.0175034	0.106378	no
hsa-miR-6727-3p	ENST00000556626	mRNA	ENSG00000070182	SPTB	spectrin beta, erythrocytic [Source:HGNC Symbol;Acc:HGNC:11274]	-0.528267	0.0292681	0.127166	no
hsa-miR-6825-5p	ENST00000469257	mRNA	ENSG00000173812	EIF1	eukaryotic translation initiation factor 1 [Source:HGNC Symbol;Acc:HGNC:3249]	-0.635285	0.00613775	0.0775555	no
hsa-miR-6747-3p	ENST00000645560	mRNA	ENSG00000100150	DEPDC5	DEP domain containing 5 [Source:HGNC Symbol;Acc:HGNC:18423]	-0.706597	0.00151898	0.0502767	no
hsa-miR-125a-3p	ENST00000615189	mRNA	ENSG00000100003	SEC14L2	SEC14 like lipid binding 2 [Source:HGNC Symbol;Acc:HGNC:10699]	-0.747983	0.000554813	0.0394072	no
hsa-miR-6894-3p	ENST00000645560	mRNA	ENSG00000100150	DEPDC5	DEP domain containing 5 [Source:HGNC Symbol;Acc:HGNC:18423]	-0.689183	0.00221153	0.0566907	no
hsa-miR-92a-1-5p	ENST00000554143	mRNA	ENSG00000165795	NDRG2	NDRG family member 2 [Source:HGNC Symbol;Acc:HGNC:14460]	-0.745985	0.000584915	0.0394323	no
hsa-miR-6734-5p	ENST00000354567	mRNA	ENSG00000154027	AK5	adenylate kinase 5 [Source:HGNC Symbol;Acc:HGNC:365]	-0.750638	0.000516803	0.0394072	no
hsa-miR-6780a-5p	ENST00000469257	mRNA	ENSG00000173812	EIF1	eukaryotic translation initiation factor 1 [Source:HGNC Symbol;Acc:HGNC:3249]	-0.617647	0.00824233	0.0832493	no
hsa-miR-125a-3p	ENST00000417037	mRNA	ENSG00000172936	MYD88	MYD88, innate immune signal transduction adaptor [Source:HGNC Symbol;Acc:HGNC:7562]	-0.508613	0.0370824	0.138027	no
hsa-miR-141-3p	ENST00000613823	mRNA	ENSG00000169764	UGP2	UDP-glucose pyrophosphorylase 2 [Source:HGNC Symbol;Acc:HGNC:12527]	-0.493621	0.0440409	0.148458	no
hsa-miR-4745-3p	ENST00000376358	mRNA	ENSG00000196998	WDR45	WD repeat domain 45 [Source:HGNC Symbol;Acc:HGNC:28912]	-0.663393	0.00369365	0.0671316	no
hsa-miR-1538	ENST00000376358	mRNA	ENSG00000196998	WDR45	WD repeat domain 45 [Source:HGNC Symbol;Acc:HGNC:28912]	-0.517201	0.0334938	0.132087	no
hsa-miR-1976	ENST00000647932	mRNA	ENSG00000146409	SLC18B1	solute carrier family 18 member B1 [Source:HGNC Symbol;Acc:HGNC:21573]	-0.583181	0.0140019	0.097717	no
hsa-miR-6882-3p	ENST00000645560	mRNA	ENSG00000100150	DEPDC5	DEP domain containing 5 [Source:HGNC Symbol;Acc:HGNC:18423]	-0.545926	0.0233889	0.116788	no
hsa-miR-6855-5p	ENST00000371027	mRNA	ENSG00000213390	ARHGAP19	Rho GTPase activating protein 19 [Source:HGNC Symbol;Acc:HGNC:23724]	-0.53514	0.0268584	0.12251	no
hsa-miR-1226-3p	ENST00000645560	mRNA	ENSG00000100150	DEPDC5	DEP domain containing 5 [Source:HGNC Symbol;Acc:HGNC:18423]	-0.66132	0.00384124	0.0677585	no
hsa-miR-6741-3p	ENST00000556626	mRNA	ENSG00000070182	SPTB	spectrin beta, erythrocytic [Source:HGNC Symbol;Acc:HGNC:11274]	-0.490098	0.0458099	0.151367	no
hsa-miR-1343-3p	ENST00000559158	mRNA	ENSG00000185787	MORF4L1	mortality factor 4 like 1 [Source:HGNC Symbol;Acc:HGNC:16989]	-0.545763	0.0234386	0.116884	no
hsa-miR-1343-3p	ENST00000417037	mRNA	ENSG00000172936	MYD88	MYD88, innate immune signal transduction adaptor [Source:HGNC Symbol;Acc:HGNC:7562]	-0.547559	0.0228956	0.116552	no
hsa-miR-4732-5p	ENST00000647932	mRNA	ENSG00000146409	SLC18B1	solute carrier family 18 member B1 [Source:HGNC Symbol;Acc:HGNC:21573]	-0.692451	0.00206495	0.0566907	no
hsa-miR-1908-5p	ENST00000321358	mRNA	ENSG00000065978	YBX1	Y-box binding protein 1 [Source:HGNC Symbol;Acc:HGNC:8014]	-0.497549	0.0421293	0.146179	no
hsa-miR-5010-3p	ENST00000621592	mRNA	ENSG00000136997	MYC	MYC proto-oncogene, bHLH transcription factor [Source:HGNC Symbol;Acc:HGNC:7553]	-0.610191	0.00928946	0.0857953	no
hsa-miR-1908-5p	ENST00000615189	mRNA	ENSG00000100003	SEC14L2	SEC14 like lipid binding 2 [Source:HGNC Symbol;Acc:HGNC:10699]	-0.646529	0.00503892	0.0728271	no
hsa-miR-6881-3p	ENST00000399696	mRNA	ENSG00000186184	POLR1D	RNA polymerase I and III subunit D [Source:HGNC Symbol;Acc:HGNC:20422]	-0.569568	0.0170022	0.105199	no
hsa-miR-6862-5p	ENST00000621592	mRNA	ENSG00000136997	MYC	MYC proto-oncogene, bHLH transcription factor [Source:HGNC Symbol;Acc:HGNC:7553]	-0.615734	0.0085016	0.0837638	no
hsa-miR-6894-3p	ENST00000556626	mRNA	ENSG00000070182	SPTB	spectrin beta, erythrocytic [Source:HGNC Symbol;Acc:HGNC:11274]	-0.526349	0.0299695	0.127718	no
hsa-miR-766-3p	ENST00000651436	mRNA	ENSG00000160305	DIP2A	disco interacting protein 2 homolog A [Source:HGNC Symbol;Acc:HGNC:17217]	-0.624289	0.00739104	0.0818345	no
hsa-miR-636	ENST00000554143	mRNA	ENSG00000165795	NDRG2	NDRG family member 2 [Source:HGNC Symbol;Acc:HGNC:14460]	-0.544828	0.0237255	0.117484	no
hsa-miR-202-5p	ENST00000457474	mRNA	ENSG00000139436	GIT2	GIT ArfGAP 2 [Source:HGNC Symbol;Acc:HGNC:4273]	-0.54724	0.0229914	0.116585	no
hsa-miR-6881-3p	ENST00000417037	mRNA	ENSG00000172936	MYD88	MYD88, innate immune signal transduction adaptor [Source:HGNC Symbol;Acc:HGNC:7562]	-0.570165	0.0168609	0.104655	no
hsa-miR-509-3-5p	ENST00000371027	mRNA	ENSG00000213390	ARHGAP19	Rho GTPase activating protein 19 [Source:HGNC Symbol;Acc:HGNC:23724]	-0.494608	0.0435542	0.148314	no
hsa-miR-6780a-5p	ENST00000457361	mRNA	ENSG00000030419	IKZF2	IKAROS family zinc finger 2 [Source:HGNC Symbol;Acc:HGNC:13177]	-0.650122	0.00472352	0.0707906	no
hsa-miR-6855-5p	ENST00000615189	mRNA	ENSG00000100003	SEC14L2	SEC14 like lipid binding 2 [Source:HGNC Symbol;Acc:HGNC:10699]	-0.766211	0.000334771	0.0335771	no
hsa-miR-1908-5p	ENST00000479035	mRNA	ENSG00000125691	RPL23	ribosomal protein L23 [Source:HGNC Symbol;Acc:HGNC:10316]	-0.522379	0.031462	0.129958	no
hsa-miR-4745-3p	ENST00000567212	mRNA	ENSG00000103353	UBFD1	ubiquitin family domain containing 1 [Source:HGNC Symbol;Acc:HGNC:30565]	-0.512162	0.0355657	0.135126	no
hsa-miR-5100	ENST00000615189	mRNA	ENSG00000100003	SEC14L2	SEC14 like lipid binding 2 [Source:HGNC Symbol;Acc:HGNC:10699]	-0.610748	0.00920777	0.0857952	no
hsa-miR-3173-5p	ENST00000556626	mRNA	ENSG00000070182	SPTB	spectrin beta, erythrocytic [Source:HGNC Symbol;Acc:HGNC:11274]	-0.609859	0.00933852	0.0858297	no
hsa-miR-1538	ENST00000556626	mRNA	ENSG00000070182	SPTB	spectrin beta, erythrocytic [Source:HGNC Symbol;Acc:HGNC:11274]	-0.51405	0.034778	0.133925	no
hsa-miR-6882-3p	ENST00000556626	mRNA	ENSG00000070182	SPTB	spectrin beta, erythrocytic [Source:HGNC Symbol;Acc:HGNC:11274]	-0.486833	0.0474972	0.153748	no
hsa-miR-1343-3p	ENST00000615189	mRNA	ENSG00000100003	SEC14L2	SEC14 like lipid binding 2 [Source:HGNC Symbol;Acc:HGNC:10699]	-0.487365	0.0472191	0.153227	no
hsa-miR-6727-3p	ENST00000457361	mRNA	ENSG00000030419	IKZF2	IKAROS family zinc finger 2 [Source:HGNC Symbol;Acc:HGNC:13177]	-0.63079	0.0066276	0.0790856	no
hsa-miR-6882-3p	ENST00000615189	mRNA	ENSG00000100003	SEC14L2	SEC14 like lipid binding 2 [Source:HGNC Symbol;Acc:HGNC:10699]	-0.58171	0.0143043	0.0985413	no
hsa-miR-6782-3p	ENST00000645560	mRNA	ENSG00000100150	DEPDC5	DEP domain containing 5 [Source:HGNC Symbol;Acc:HGNC:18423]	-0.659948	0.00394153	0.0686084	no
hsa-miR-3605-3p	ENST00000354567	mRNA	ENSG00000154027	AK5	adenylate kinase 5 [Source:HGNC Symbol;Acc:HGNC:365]	-0.577794	0.0151347	0.100662	no
hsa-miR-1226-3p	ENST00000520958	mRNA	ENSG00000081059	TCF7	transcription factor 7 [Source:HGNC Symbol;Acc:HGNC:11639]	-0.564071	0.0183477	0.108718	no
hsa-miR-6749-3p	ENST00000563576	mRNA	ENSG00000174197	MGA	MGA, MAX dimerization protein [Source:HGNC Symbol;Acc:HGNC:14010]	-0.616516	0.00839476	0.0837638	no
hsa-miR-4732-3p	ENST00000615189	mRNA	ENSG00000100003	SEC14L2	SEC14 like lipid binding 2 [Source:HGNC Symbol;Acc:HGNC:10699]	-0.483663	0.0491792	0.156492	no
hsa-miR-194-3p	ENST00000617418	mRNA	ENSG00000101040	ZMYND8	zinc finger MYND-type containing 8 [Source:HGNC Symbol;Acc:HGNC:9397]	-0.525845	0.0301559	0.127896	no
hsa-miR-616-3p	ENST00000512565	mRNA	ENSG00000013561	RNF14	ring finger protein 14 [Source:HGNC Symbol;Acc:HGNC:10058]	-0.695706	0.00192692	0.0566907	no
hsa-miR-6882-3p	ENST00000520958	mRNA	ENSG00000081059	TCF7	transcription factor 7 [Source:HGNC Symbol;Acc:HGNC:11639]	-0.603543	0.0103103	0.0902348	no
hsa-miR-1229-3p	ENST00000520958	mRNA	ENSG00000081059	TCF7	transcription factor 7 [Source:HGNC Symbol;Acc:HGNC:11639]	-0.515022	0.0343781	0.132944	no
15_20525	ENST00000372484	mRNA	ENSG00000064601	CTSA	cathepsin A [Source:HGNC Symbol;Acc:HGNC:9251]	-0.626936	0.00707215	0.0803192	no
19_24991	ENST00000554143	mRNA	ENSG00000165795	NDRG2	NDRG family member 2 [Source:HGNC Symbol;Acc:HGNC:14460]	-0.523566	0.0310099	0.129512	no
hsa-miR-6511a-3p	MSTRG.14674.7	mRNA	ENSG00000141349	G6PC3	glucose-6-phosphatase catalytic subunit 3 [Source:HGNC Symbol;Acc:HGNC:24861]	-0.516408	0.0338134	0.132087	no
hsa-miR-6825-5p	MSTRG.14674.7	mRNA	ENSG00000141349	G6PC3	glucose-6-phosphatase catalytic subunit 3 [Source:HGNC Symbol;Acc:HGNC:24861]	-0.602437	0.0104884	0.0903179	no
